# Supplementary material for: Construction of highly enantioselective spiro-oxindole derivatives with fused chromene via organocascade catalysis
Source: Royal Society of Chemistry journal article supplement (doi:10.1039/c6ra06812j), 2016-01-01
Supplement: c6ra06812j1.pdf [file c6ra06812j1.pdf]

## Supporting Information

### Construction of Highly Enantioselective Spiro-oxindole Derivatives with Fused Chromene via Organocascade Catalysis

Prathibha kumari,<sup>a, b</sup> Sekhar Nandi,<sup>a, b</sup> Gaurav Kumar,<sup>a, b</sup> Noorul H. Khan,\*<sup>a, b</sup> Rukhsana I. Kureshy,<sup>a, b</sup> Sayed H. R. Abdi<sup>a, b</sup> E. Suresh,<sup>b, c</sup> and Hari C. Bajaj<sup>a, b</sup>

<sup>a</sup> Division of Inorganic Materials and Catalysis, Central Salt and Marine Chemicals Research Institute (CSIR-CSMCRI), Council of Scientific & Industrial Research (CSIR), G. B. Marg, Bhavnagar, 364002, Gujarat, India.

<sup>b</sup> Academy of Scientific & Innovative Research (AcSIR)

<sup>c</sup> Analytical Discipline and Centralised Instrumental Facility, Central Salt and Marine Chemicals Research Institute (CSIR-CSMCRI), G. B. Marg, Bhavnagar 364 002, Gujarat, India.

# Contents

|                                                                     | <b>Page no.</b> |
|---------------------------------------------------------------------|-----------------|
| <b>I. General Information.....</b>                                  | <b>3</b>        |
| <b>II. General procedure for asymmetric catalytic reaction.....</b> | <b>3</b>        |
| <b>III. Characterization of the desired products .....</b>          | <b>4-30</b>     |
| <b>IV. NMR spectra of compounds .....</b>                           | <b>31-47</b>    |
| <b>V. HRMS charts of compounds.....</b>                             | <b>48-65</b>    |

## 1. General Experimental methods:

Different isatin, naphthols and sesamols (Aldrich, TCI Chemicals and Germany) were used as received. All the solvents used in the present study were dried by known purification technique.<sup>1</sup> NMR spectra were obtained with a Bruker F113V spectrometer (500 MHz / 200 MHz) and are referenced internally with TMS. Splitting patterns were reported as s, singlet; d, doublet; dd, doublet of doublet; t, triplet; q, quartet; m, multiplet; br, broad. Enantiomeric excess (ee) were determined by HPLC (Shimadzu SCL-10AVP or Shimadzu VP-Prominence) using Daicel Chiralpak IA, IB and IC chiral columns with 2-propanol/hexane as eluent. FT-IR spectra were carried out using KBr (Perkin-Elmer spectrum GX spectrophotometer). High-resolution mass spectra were obtained with a LC-MS (Q-TOF), and for electrolyte quadruple, for calibration leucine was used. All samples were prepared in acetonitrile. Optical rotations were determined by automatic polarimeter (Digipol-781, Rudolph Instrument, USA). For the product purification flash chromatography was performed using silica gel 240-400 mesh.

## 2. General procedure for asymmetric catalytic reaction:

In a reaction vial **Cat. 5** (2 mol%), indonylidene cyanoacetate (0.2 mmol) and 30 mg of 4 ÅMS were dissolved in 2 mL of dry Ph-CF<sub>3</sub> at room temperature and the solution was stirred for 10 mins at RT. After 10 mins 1-naphthol/ sesamol (0.4 mmol) was added slowly over a period of 30 mins. The reaction was stirred at room temperature till the reaction was completed (TLC). Finally the reaction mixture was subjected to column chromatography, using 9:1 (DCM/ EtOAc) as eluent to efford desired product and enantiomeric excess was determined by HPLC.

### 3. Characterization data for products

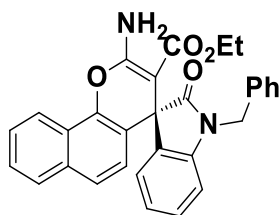

**3a**; Enantiomeric excess (99%) was determined by chiral HPLC (chiralpak IA), hexane-*i*-PrOH 70:30, 0.7 mL/min, major enantiomer  $t_r = 15.87$  min, minor enantiomer  $t_r = 10.2$  min.

$[\alpha]_D^{20} -58$  ( $c = 1$ ) (99% *ee*);  $^1\text{H NMR}$  (500 MHz,  $\text{CDCl}_3$ )  $\delta$  8.15 (d,  $J = 8$  Hz, 1H), 7.68 (d,  $J = 7$  Hz, 1H), 7.49-7.45 (m, 5H), 7.35 (t,  $J = 14.5$  Hz, 3H), 7.34-7.32 (m, 2H), 7.13-7.15 (m, 1H), 6.98 (s, 1H), 6.53 (d,  $J = 8.5$  Hz, 1H), 5.26 (d,  $J = 15$ , 1H), 4.67 (d,  $J = 15.5$  Hz, 1H), 3.97-3.66 (m, 2H), 0.70 (t,  $J = 13$  Hz, 3H).;  $^{13}\text{C NMR}$  (125 MHz,  $\text{CDCl}_3$ )  $\delta$  141.3, 140.0, 136.1, 133.4, 128.8, 128.2, 127.9, 127.7, 127.4, 127.0, 126.6, 124.6, 124.2, 122.9, 121.0, 109.3, 96.1, 59.4, 50.5, 44.6, 13.6. HRMS (TOF ES): Calcd for  $\text{C}_{30}\text{H}_{25}\text{N}_2\text{O}_4$  ( $\text{M}+1$ )<sup>+</sup> 477.1800 found 477.1804, error 0.8 ppm.

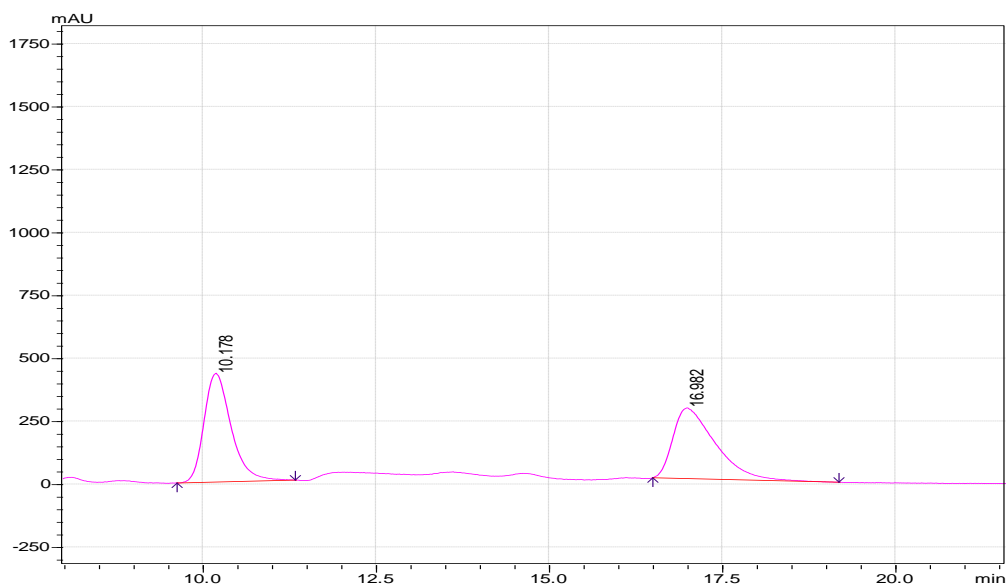

| Peak# | Ret. Time | Peak Start | Peak End | Area%   |
|-------|-----------|------------|----------|---------|
| 1     | 10.178    | 9.621      | 11.328   | 49.7249 |
| 2     | 16.982    | 16.491     | 19.179   | 50.2751 |

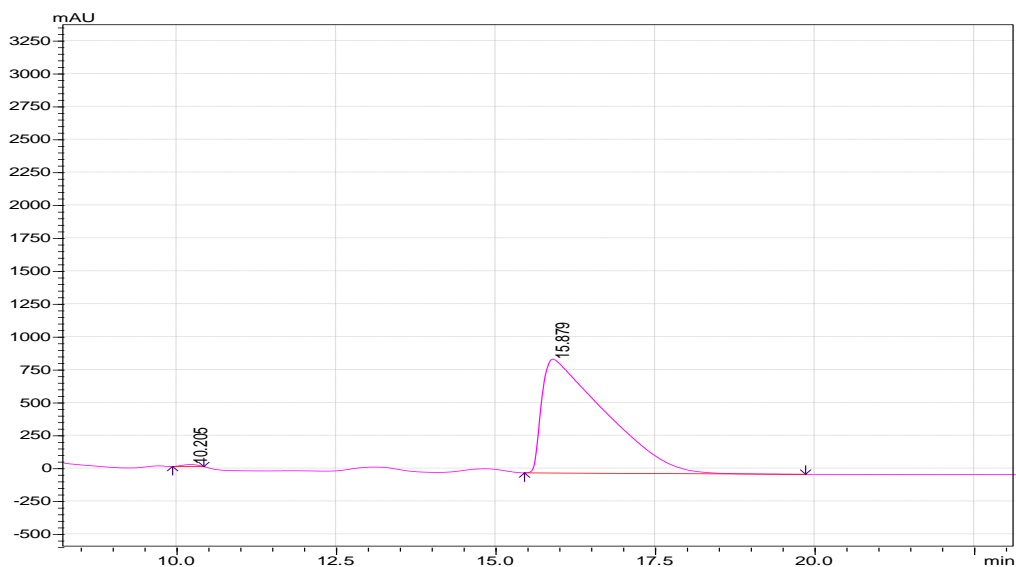

| Peak# | Ret. Time | Peak Start | Peak End | Area%   |
|-------|-----------|------------|----------|---------|
| 1     | 10.205    | 9.931      | 10.421   | 0.4318  |
| 2     | 15.879    | 15.445     | 19.851   | 99.5682 |

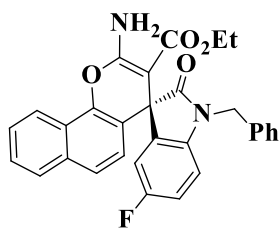

**3b**; Enantiomeric excess (98%) was determined by chiral HPLC (chiralpak IA), hexane-*i*-PrOH 70:30, 0.7 mL/min, major enantiomer  $t_r = 32.9$  min, minor enantiomer  $t_r = 16.9$  min.

$[\alpha]_D^{20} -58.1$  ( $c = 1$ ) (98% ee);  $^1\text{H NMR}$  (500 MHz,  $\text{CDCl}_3$ )  $\delta$  8.12–8.11 (m, 1H), 7.66–7.65 (m, 1H), 7.49 (d,  $J = 7$  Hz, 3H), 7.46–7.44 (m, 2H), 7.39 (t,  $J = 14.5$ , 3H), 7.33 (t,  $J = 14.5$  Hz, 2H), 6.89–6.85 (m, 1H), 6.81–6.79 (m, 1H), 6.77–6.75 (m, 1H), 6.54 (d,  $J = 8.5$  Hz, 1H), 5.26 (d,  $J = 15$  Hz, 1H), 4.68 (d,  $J = 15.5$  Hz, 1H), 3.98–3.64 (m, 2H), 0.68 (t,  $J = 14$  Hz, 3H);  $^{13}\text{C NMR}$  (125 MHz,  $\text{CDCl}_3$ )  $\delta$  179.8, 168.2, 161.0, 160.6, 158.7, 143.1, 140.17, 140.12, 138.7, 136.3, 133.4, 128.8, 128.2, 127.9, 127.4, 127.0, 126.5, 124.5, 123.3, 122.9, 121.0, 115.4, 114.1, 113.9, 111.9, 11.7, 108.9, 108.8, 74.8, 59.4, 50.8, 44.7, 13.6. HRMS (TOF ES): Calcd for  $\text{C}_{30}\text{H}_{24}\text{N}_2\text{O}_4\text{F}$  ( $\text{M}+1$ ) $^+$  495.1714 found 495.1705, error -1.81 ppm.

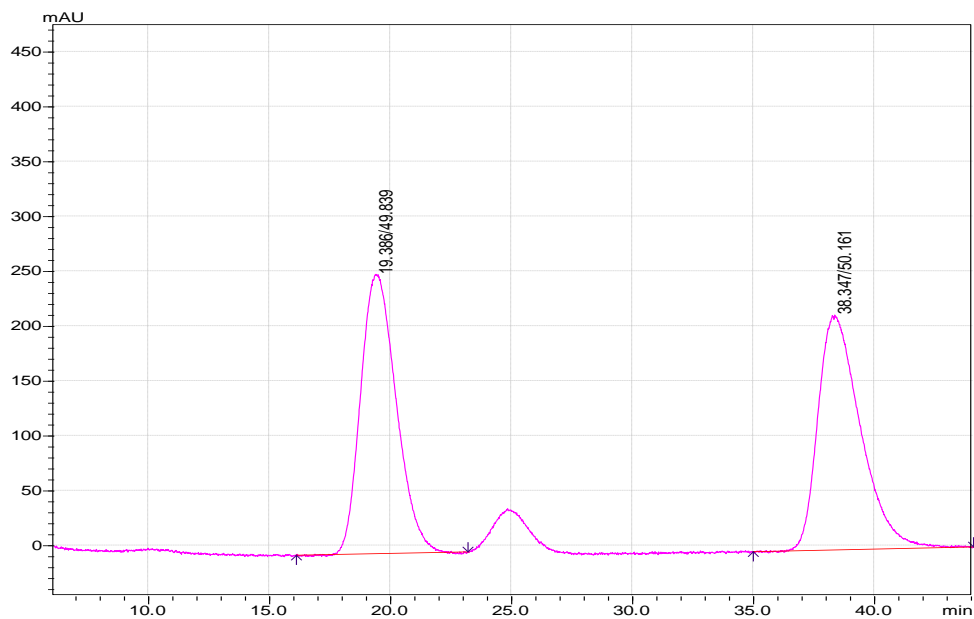

| Peak# | Ret. Time | Area     | Peak Start | Peak End | Area%   |
|-------|-----------|----------|------------|----------|---------|
| 1     | 19.386    | 25923330 | 16.107     | 23.200   | 49.8392 |
| 2     | 38.347    | 26090612 | 34.987     | 44.085   | 50.1608 |

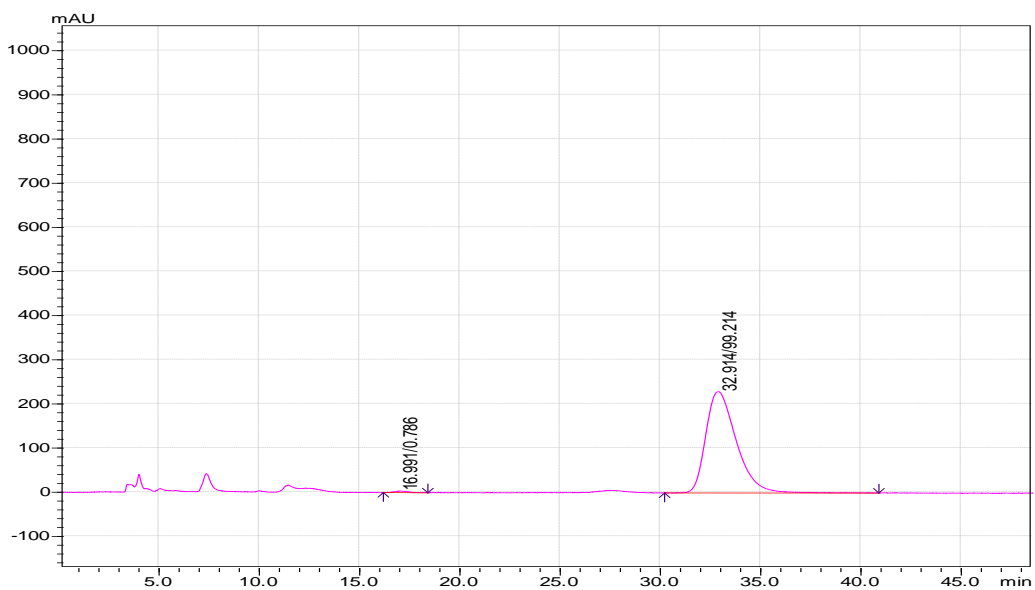

| Peak# | Ret. Time | Area     | Peak Start | Peak End | Area%   |
|-------|-----------|----------|------------|----------|---------|
| 1     | 16.991    | 192533   | 16.181     | 18.400   | 0.7863  |
| 2     | 32.914    | 24293390 | 30.208     | 40.896   | 99.2137 |

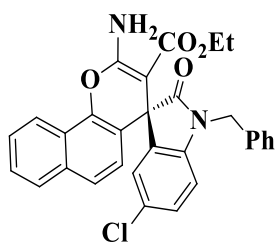

**3c**; Enantiomeric excess (97%) was determined by chiral HPLC (chiralpak IC), hexane-*i*PrOH 70:30, 0.7 mL/min, major enantiomer  $t_r = 34.534$  min, minor enantiomer  $t_r = 13.66$  min.  $[\alpha]_D^{20} -40.2$  ( $c = 1$ ) (97% *ee*);  $^1\text{H}$  NMR (500 MHz,  $\text{CDCl}_3$ )  $\delta$  8.11–8.09 (m, 1H), 7.65–7.64 (m, 1H), 7.49 (d,  $J = 7$  Hz, 3H), 7.44-7.42 (m, 2H), 7.40-7.37 (m, 2H), 7.34-7.31 (m, 3H), 6.88-6.84 (m, 1H), 6.81-6.79 (m, 1H), 6.77-6.75 (m, 1H), 6.54 (d,  $J = 8.5$  Hz, 1H), 5.26 (d,  $J = 15$  Hz, 1H), 4.69 (d,  $J = 15$  Hz, 1H), 3.97-3.64 (m, 2H), 0.68 (t,  $J = 14$  Hz, 3 H);  $^{13}\text{C}$  NMR (125 MHz,  $\text{CDCl}_3$ )  $\delta$  179.8, 168.2, 161.1, 143.2, 140.2, 138.7, 136.3, 133.4, 128.8, 128.2, 127.9, 127.3, 127.0, 126.5, 124.5, 123.3, 122.9, 121.0, 115.3, 114.1, 113.9, 111.9, 108.9, 108.8, 74.7, 59.4, 50.9, 44.7, 13.6. HRMS (TOF ES): Calcd for  $\text{C}_{30}\text{H}_{24}\text{N}_2\text{O}_4\text{Cl}$  ( $\text{M}+1$ ) $^+$  511.1419 found 511.1405, error -2.73 ppm.

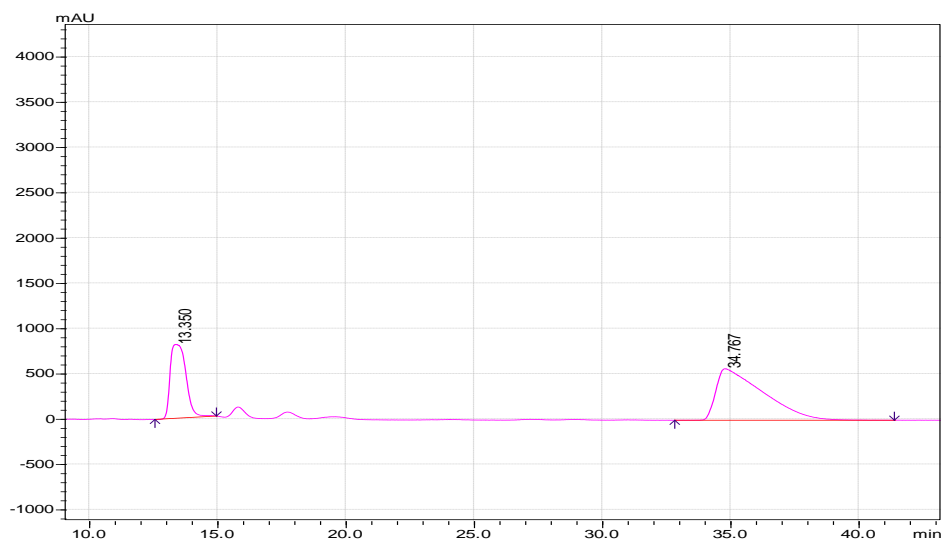

| Peak# | Ret. Time | Area     | Peak Start | Peak End | Area%   |
|-------|-----------|----------|------------|----------|---------|
| 1     | 13.350    | 62850036 | 12.544     | 14.944   | 50.7564 |
| 2     | 34.767    | 60976824 | 32.811     | 41.376   | 49.2436 |

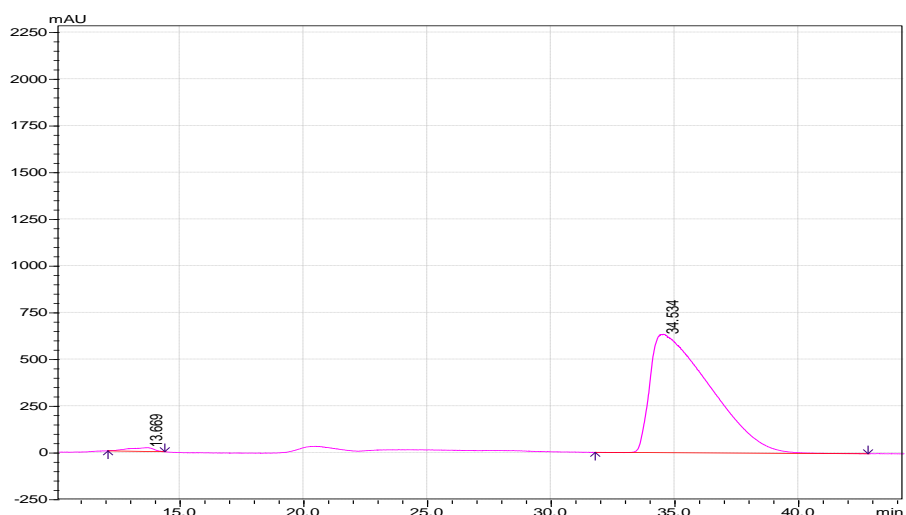

| Peak# | Ret. Time | Peak Start | Peak End | Area%   |
|-------|-----------|------------|----------|---------|
| 1     | 13.669    | 12.085     | 14.379   | 1.2917  |
| 2     | 34.534    | 31.776     | 42.805   | 98.7083 |

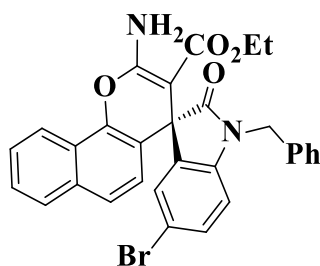

**3d**; Enantiomeric excess (99 %) was determined by chiral HPLC (chiralpak IB), hexane-*i*-PrOH 80:20, 0.7 mL/min, major enantiomer  $t_r = 23.2$  min, minor enantiomer  $t_r = 19.2$  min.

$[\alpha]_D^{20} -23.5$  ( $c = 1$ ) (99 % *ee*);  $^1\text{H NMR}$  (500 MHz,  $\text{CDCl}_3$ )  $\delta$  8.22 (d,  $J = 8.5$  Hz, 1H), 7.73 (d,  $J = 8$  Hz, 1H), 7.57 (t,  $J = 15$  Hz, 1H), 7.52 (t,  $J = 15$  Hz, 1H), 7.47 (d,  $J = 7.5$  Hz, 1H), 7.38 (t,  $J = 15.5$  Hz, 2H), 7.34 (d,  $J = 8.5$  Hz, 3H), 7.29 (d,  $J = 8$  Hz, 1H), 7.11 (s, 1H), 6.76 (d,  $J = 8$  Hz, 1H), 6.54 (d,  $J = 8.5$  Hz, 1H), 5.24 (d,  $J = 15$  Hz, 1H), 4.66 (d,  $J = 15$  Hz, 1H), 3.97-3.66 (m, 2H), 0.70 (t,  $J = 14$  Hz, 3H).;  $^{13}\text{C NMR}$  (125 MHz,  $\text{CDCl}_3$ )  $\delta$  179.8, 168.1, 160.9, 144.1, 143.1, 137.3, 135.9, 133.4, 130.8, 128.89, 128.80, 127.4, 127.0, 126.6, 125.8, 125.0, 124.5, 123.2, 122.9, 121.0, 115.3, 111.6, 74.7, 59.4, 44.6, 13.6. HRMS (TOF ES): Calcd for  $\text{C}_{30}\text{H}_{24}\text{N}_2\text{O}_4\text{Br}$  ( $\text{M}+1$ ) $^+$  554.0914 found 555.0941, error 4.86 ppm



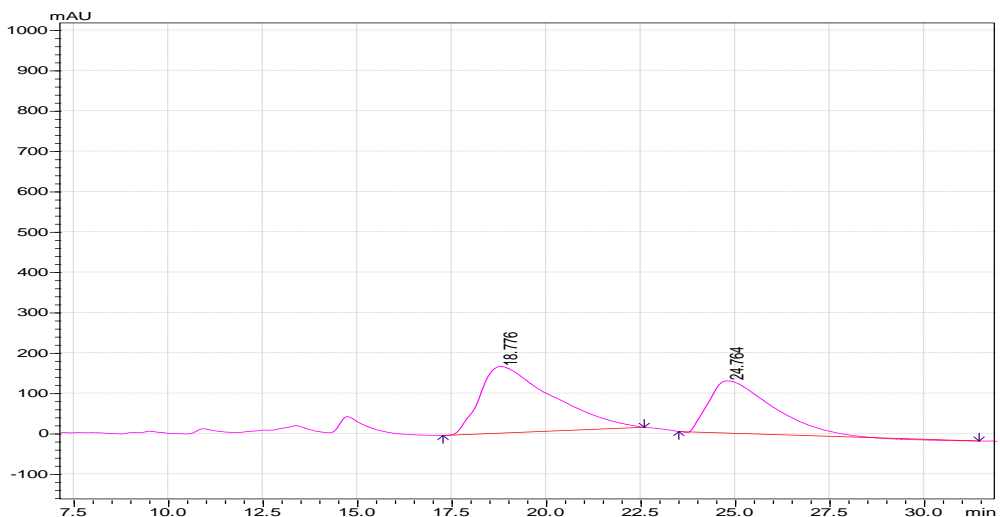

| Peak# | Ret. Time | Area     | Peak Start | Peak End | Area%   |
|-------|-----------|----------|------------|----------|---------|
| 1     | 18.776    | 21973239 | 17.259     | 22.581   | 59.1268 |
| 2     | 24.764    | 15189646 | 23.499     | 31.445   | 40.8732 |

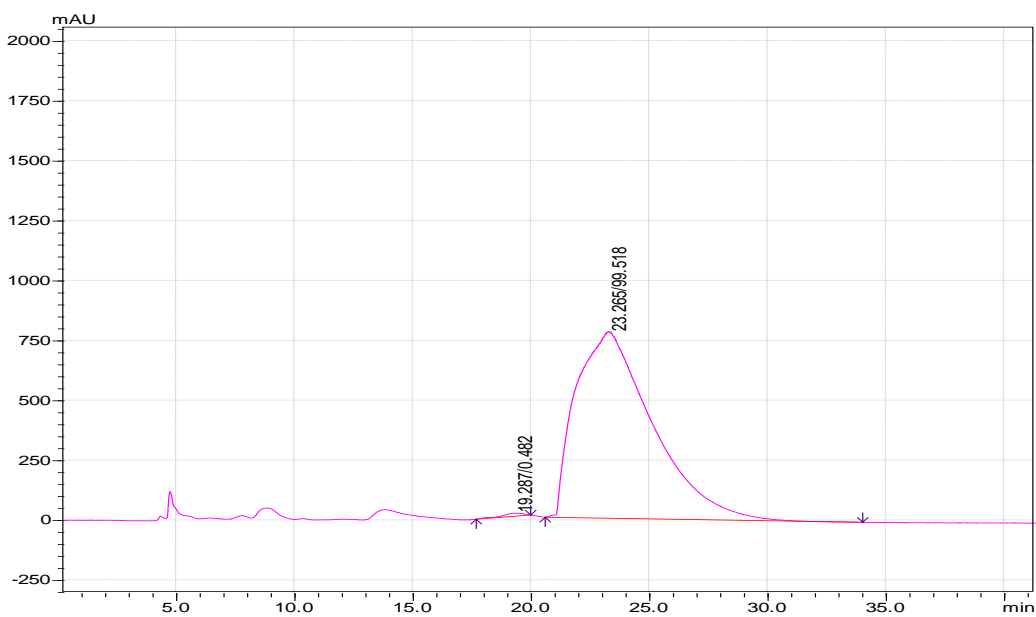

| Peak# | Ret. Time | Area      | Peak Start | Peak End | Area%   |
|-------|-----------|-----------|------------|----------|---------|
| 1     | 19.287    | 846995    | 17.664     | 19.968   | 0.4816  |
| 2     | 23.265    | 175024311 | 20.576     | 34.005   | 99.5184 |

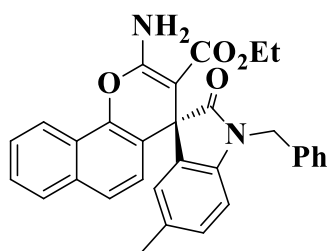

**3e**; Enantiomeric excess (98%) was determined by chiral HPLC (chiralpak IC), hexane-*i*-PrOH 70:30, 0.7 mL/min, major enantiomer  $t_r = 48.9$  min, minor enantiomer  $t_r = 18.19$  min.

$[\alpha]_D^{25} = +17.5$  ( $c = 1$ ) (98% ee);  $^1\text{H NMR}$  (500 MHz,  $\text{CDCl}_3$ )  $\delta$  8.10 (d,  $J = 9.5$  Hz, 1H), 7.62(m, 1H), 7.49 (d,  $J = 7.5$  Hz, 2H), 7.43-7.40(m, 3H), 7.35(t,  $J = 15$  Hz, 2H), 7.31-7.23(m, 3H), 6.93(d,  $J = 8$  Hz, 1H), 6.79 (s, 1H), 6.75(d,  $J = 8$  Hz, 1H), 6.55(d,  $J = 8.5$ , 1H), 5.25(d,  $J = 15$ , 1H), 4.64(d,  $J = 15$  Hz, 1H), 3.93-3.66(m, 1H), 3.70-3.64(m, 1H), 2.13(s, 3H), 0.66(t,  $J = 14.5$  Hz, 3H);  $^{13}\text{C NMR}$  (125 MHz,  $\text{CDCl}_3$ ) .180.01, 168.6, 161.0, 143.1, 140.4, 138.5, 136.7, 133.3, 132.6, 128.8, 128.0, 127.8, 127.4, 126.5, 124.6, 124.4, 23.4, 121.08, 116.3, 108.2, 75.5, 59.4, 50.5, 44.6, 29.7, 21.0, 13.7. HRMS (TOF ES): Calcd for  $\text{C}_{30}\text{H}_{26}\text{N}_2\text{O}_4$  ( $\text{M}+1$ )<sup>+</sup> 491.1965 found 491.1972, error 1.42 ppm.

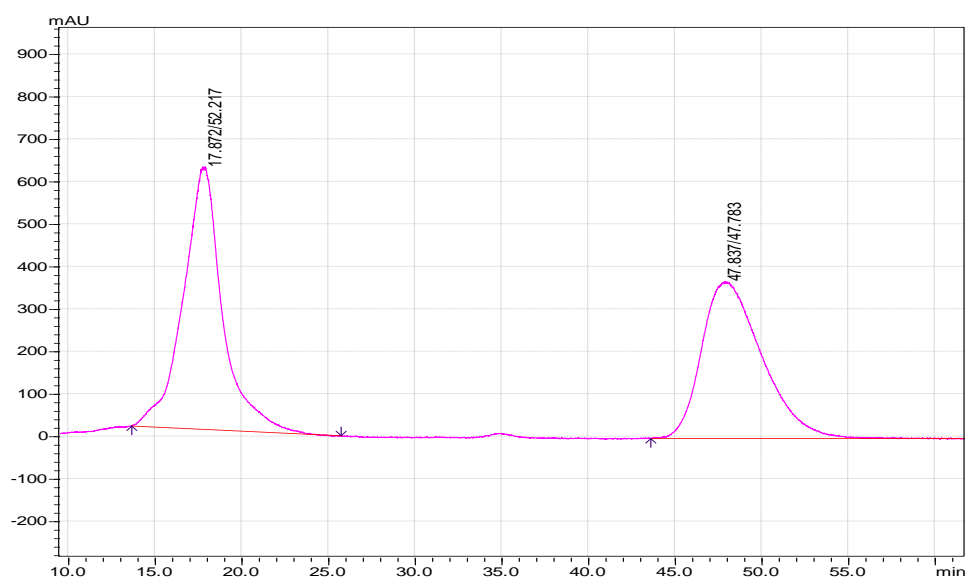

| Peak# | Ret. Time | Area     | Peak Start | Peak End | Area%   |
|-------|-----------|----------|------------|----------|---------|
| 1     | 17.872    | 97679043 | 13.643     | 25.717   | 52.2175 |
| 2     | 47.837    | 89382955 | 43.584     | 63.872   | 47.7825 |

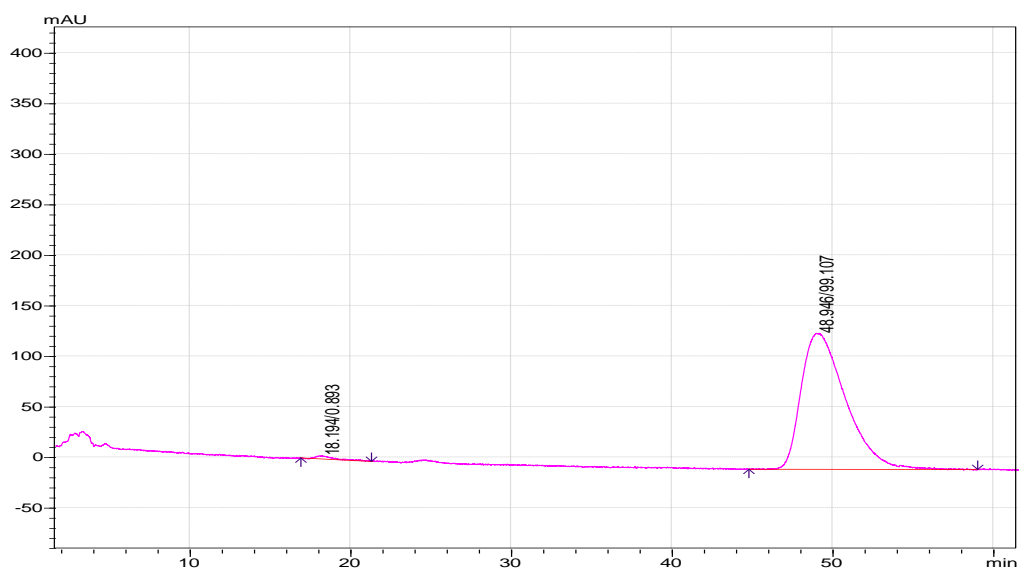

| Peak# | Ret. Time | Area     | Peak Start | Peak End | Area%   |
|-------|-----------|----------|------------|----------|---------|
| 1     | 18.194    | 232620   | 16.885     | 21.280   | 0.8930  |
| 2     | 48.946    | 25817315 | 44.768     | 58.997   | 99.1070 |

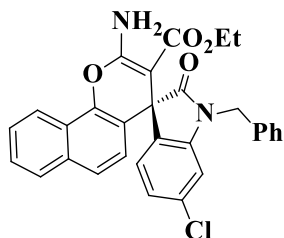

**3f**; Enantiomeric excess (99%) was determined by chiral HPLC (chiralpak IA), hexane-*i*PrOH 70:30, 0.7 mL/min, major enantiomer  $t_r = 14.4$  min, minor enantiomer  $t_r = 12.0$  min.;  $[\alpha]_D^{20} -62$  ( $c = 1$ ) (99% *ee*);  $^1\text{H NMR}$  (500 MHz,  $\text{CDCl}_3$ )  $\delta$  8.15–8.14 (m, 1H), 7.68 (d,  $J = 7$  Hz, 1H), 7.50-7.47(m, 5H), 7.40 (*t*,  $J = 14.5$  Hz, 2H), 7.35-7.31 (m, 2H), 6.90 (m, 4H), 6.52 (d,  $J = 8.5$  Hz, 1H), 5.24 (d,  $J = 15$  Hz, 1H), 4.66 (d,  $J = 15$  Hz, 1H), 3.95-3.65 (m, 2H), 0.70 (*t*,  $J = 14$  Hz, 3H).;  $^{13}\text{C NMR}$  (125 MHz,  $\text{CDCl}_3$ )  $\delta$  179.9, 168.2, 144.0, 143.1, 136.0, 136.0, 133.4, 133.3, 128.9, 128.2, 128.0, 127.4, 127.0, 126.6, 124.7, 124.6, 123.3, 122.93, 122.91,

121.1, 115.4, 108.0, 74.8, 59.5, 50.1, 44.7, 13.7. HRMS (TOF ES): Calcd for C<sub>30</sub>H<sub>24</sub>N<sub>2</sub>O<sub>4</sub>Cl (M<sup>+</sup>) 511.1425 found 511.1419, error -1.17 ppm.

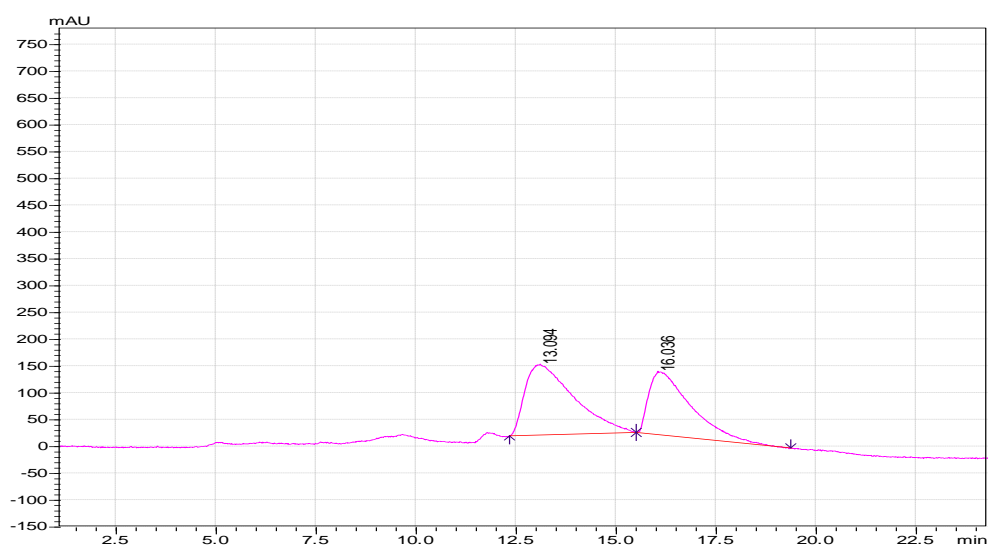

| Peak# | Ret. Time | Area     | Peak Start | Peak End | Area%   |
|-------|-----------|----------|------------|----------|---------|
| 1     | 13.094    | 11197558 | 12.331     | 15.499   | 56.2887 |
| 2     | 16.036    | 8695525  | 15.499     | 19.360   | 43.7113 |

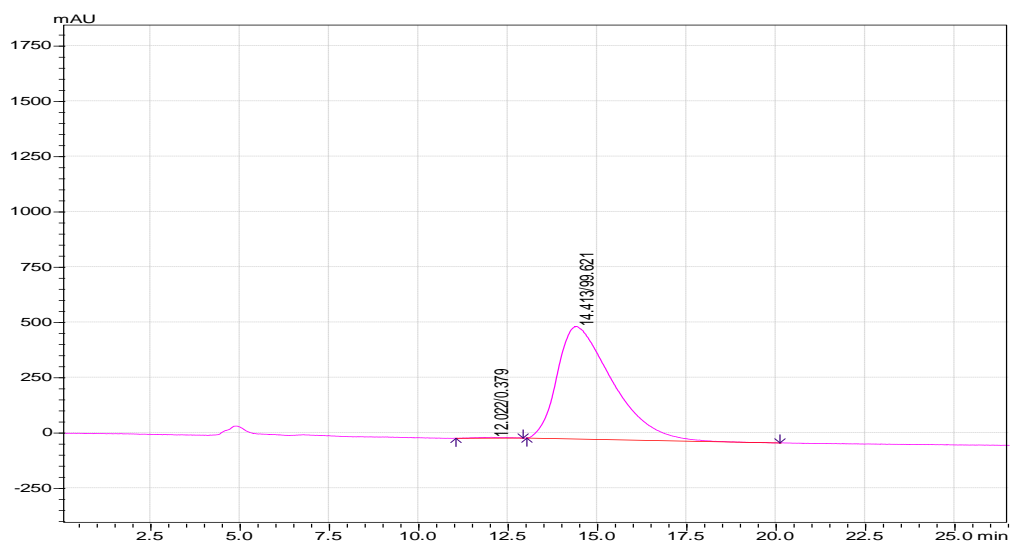

| Peak# | Ret. Time | Area     | Peak Start | Peak End | Area%   |
|-------|-----------|----------|------------|----------|---------|
| 1     | 12.022    | 208137   | 11.040     | 12.917   | 0.3792  |
| 2     | 14.413    | 54683924 | 13.024     | 20.107   | 99.6208 |

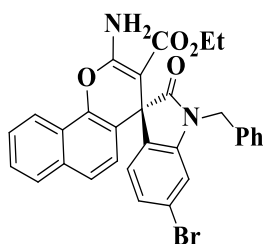

**3g**; Enantiomeric excess (99.8%) was determined by chiral HPLC (chiralpak IB), hexane-*i*-PrOH 80:20, 0.7 mL/min, major enantiomer  $t_r = 44.7$  min, minor enantiomer  $t_r = 19.3$  min.;  $[\alpha]_D^{20} -72$  ( $c = 1$ ) (99.8 % *ee*);  $^1\text{H NMR}$  (500 MHz,  $\text{CDCl}_3$ )  $\delta$  8.20 (d,  $J = 8$  Hz, 1H), 7.72 (d,  $J = 8$  Hz, 1H), 7.55 (t,  $J = 15$  Hz, 1H), 7.51 (d,  $J = 7$  Hz, 1H), 7.48 (d,  $J = 7.5$  Hz, 3H), 7.40 (t,  $J = 15$  Hz, 3H), 7.36-7.33 (m, 2H), 7.07-7.05 (m, 1H), 7.03 (d,  $J = 1.5$  Hz, 1H), 6.87 (d,  $J = 8$  Hz, 1H), 6.53 (d,  $J = 8.5$  Hz, 1H), 5.23 (d,  $J = 15.5$  Hz, 1H), 4.65 (d,  $J = 15$  Hz, 1H), 3.96-3.66 (m, 2H), 0.71 (t,  $J = 14$  Hz, 3H).;  $^{13}\text{C NMR}$  (125 MHz,  $\text{CDCl}_3$ )  $\delta$  179.8, 168.1, 160.9, 144.1, 143.1, 137.3, 135.9, 133.4, 130.8, 128.89, 128.80, 127.4, 127.0, 126.6, 125.8, 125.0, 124.5, 123.2, 122.9, 121.0, 115.3, 111.6, 74.7, 59.4, 44.6, 13.6. HRMS (TOF ES): Calcd for  $\text{C}_{30}\text{H}_{24}\text{N}_2\text{O}_4\text{Br}$  ( $\text{M}+1$ ) $^+$  555.0914 found 555.0938, error 4.32 ppm.

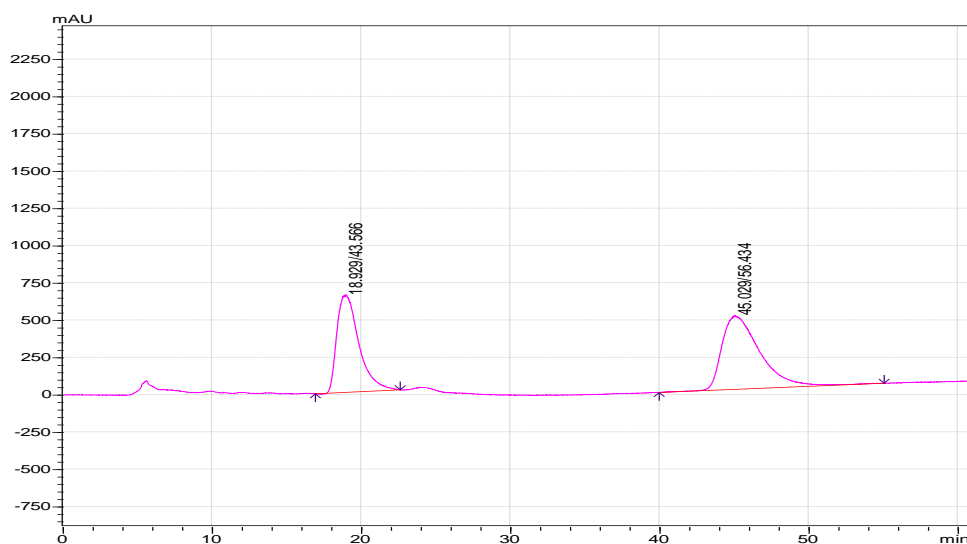

| Peak# | Ret. Time | Area     | Peak Start | Peak End | Area%   |
|-------|-----------|----------|------------|----------|---------|
| 1     | 18.929    | 67005902 | 16.907     | 22.581   | 43.5665 |
| 2     | 45.029    | 86795701 | 39.947     | 55.029   | 56.4335 |

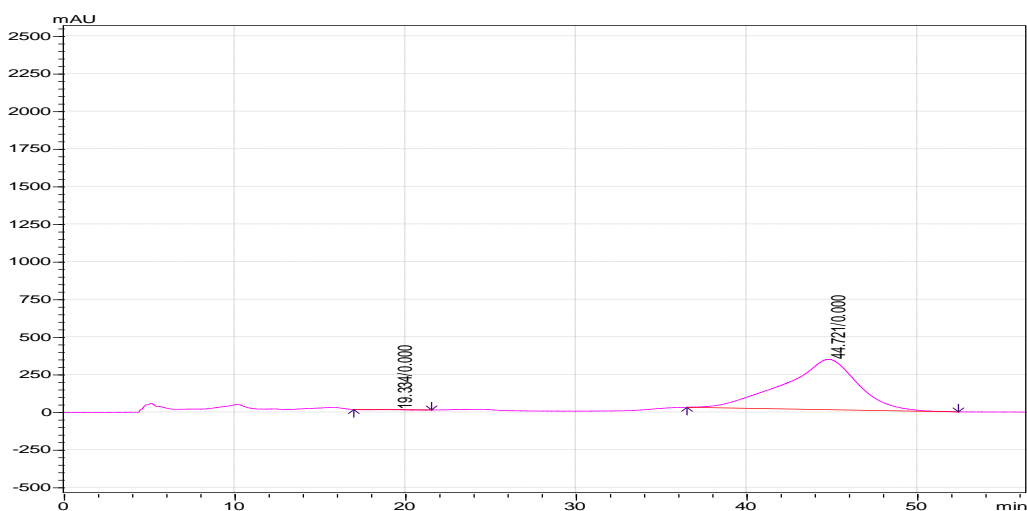

| Peak# | Ret. Time | Area     | Peak Start | Peak End | Area%   |
|-------|-----------|----------|------------|----------|---------|
| 1     | 19.334    | 14633    | 16.960     | 21.515   | 0.0147  |
| 2     | 44.721    | 99580844 | 36.480     | 52.384   | 99.9853 |

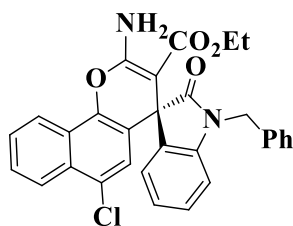

**3h**; Enantiomeric excess (99%) was determined by chiral HPLC (chiralpak IA), hexane-*i*-PrOH 70:30, 0.7 mL/min, major enantiomer  $t_r = 14.4$  min, minor enantiomer  $t_r = 12.0$  min.;  $[\alpha]_D^{20} -56.02$  ( $c = 1$ ) (99% *ee*);  $^1\text{H NMR}$  (500 MHz,  $\text{CDCl}_3$ )  $\delta$  7.90 (d,  $J = 8.5$  Hz, 1H), 7.82 (d,  $J = 8.5$  Hz, 1H), 7.54 (*t*,  $J = 16.5$  Hz, 2H), 7.45-7.39 (m, 4H), 7.35 (*t*,  $J = 14.5$  Hz, 1H), 7.28 (*t*,  $J = 15$  Hz, 1H), 6.96 (d,  $J = 7.5$  Hz, 2H), 6.91 (d,  $J = 7.5$  Hz, 2H), 6.62 (d,  $J = 19.5$  Hz, 1H), 5.37 (d,  $J = 15.5$  Hz, 1H), 4.69 (d,  $J = 15$  Hz, 1H), 3.94-3.64 (m, 2H), 0.68 (*t*,  $J = 14.5$  Hz, 3H);  $^{13}\text{C NMR}$  (125 MHz,  $\text{CDCl}_3$ )  $\delta$  180.2, 168.2, 161.1, 142.4, 142.2, 138.1, 136.4, 130.0, 129.0, 128.1, 128.0, 127.5, 127.0, 124.1, 124.0, 123.3, 122.8, 121.2, 116.1, 108.6, 74.4, 59.3, 50.5, 44.5, 13.6. HRMS (TOF ES): Calcd for  $\text{C}_{30}\text{H}_{24}\text{N}_2\text{O}_4\text{Cl}$  ( $\text{M}+1$ )<sup>+</sup> 511.1419 found 511.1425, error 1.17 ppm.

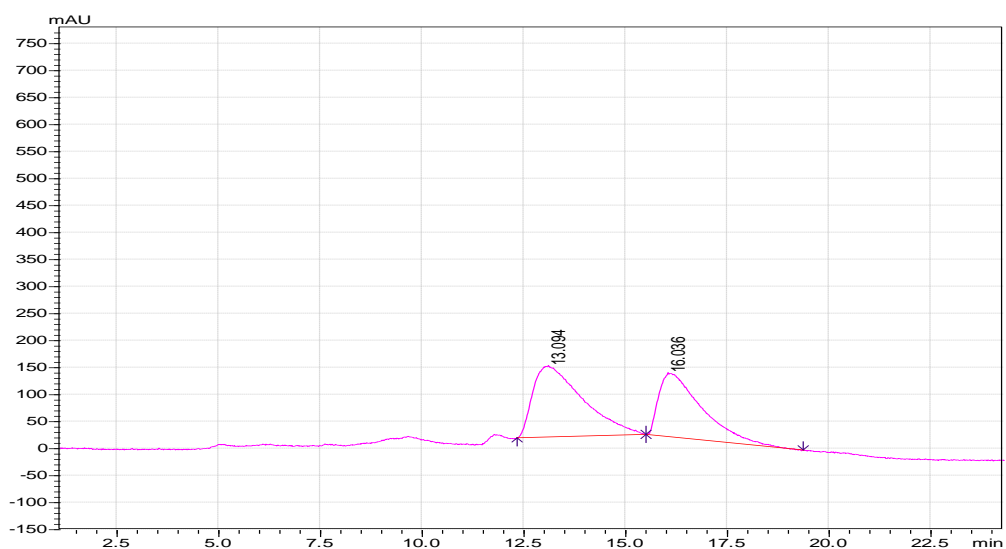

| Peak# | Ret. Time | Area     | Peak Start | Peak End | Area%   |
|-------|-----------|----------|------------|----------|---------|
| 1     | 13.094    | 11197558 | 12.331     | 15.499   | 56.2887 |
| 2     | 16.036    | 8695525  | 15.499     | 19.360   | 43.7113 |

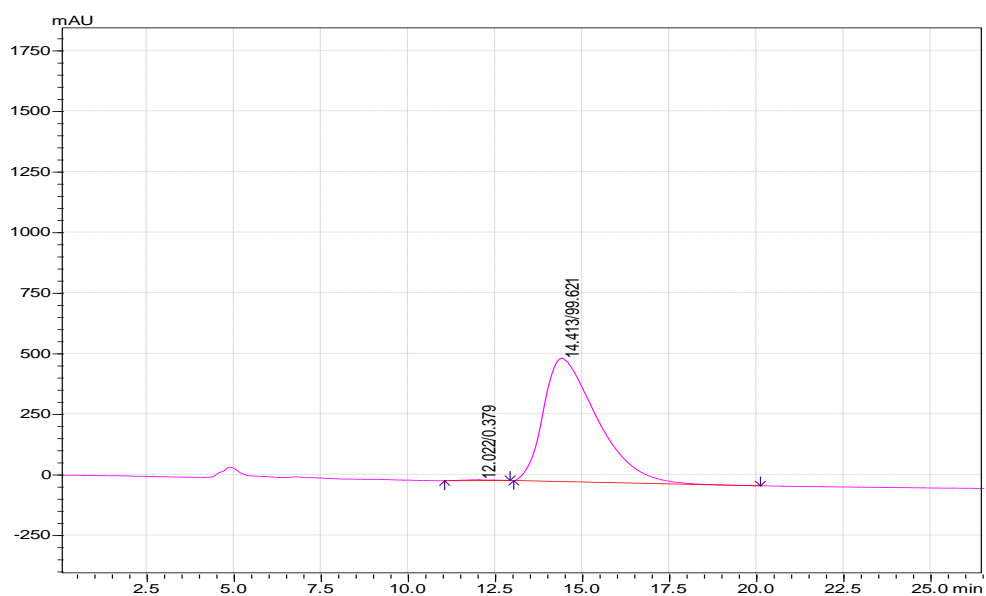

| Peak# | Ret. Time | Area     | Peak Start | Peak End | Area%   |
|-------|-----------|----------|------------|----------|---------|
| 1     | 12.022    | 208137   | 11.040     | 12.917   | 0.3792  |
| 2     | 14.413    | 54683924 | 13.024     | 20.107   | 99.6208 |

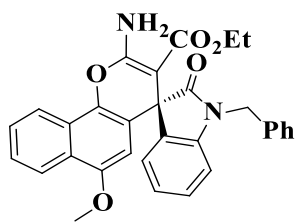

**3i**; (*S*) Enantiomeric excess (99%) was determined by chiral HPLC (chiralpak IC), hexane-*i*PrOH 70:30, 0.7 mL/min, major enantiomer  $t_r = 18.4$  min, minor enantiomer  $t_r = 11.5$  min.;  $[\alpha]_D^{20} -78.5$  ( $c = 1$ ) (99% *ee*);  $^1\text{H NMR}$  (500 MHz,  $\text{CDCl}_3$ )  $\delta$  8.09 (d,  $J = 8$  Hz, 1H), 8.03 (d,  $J = 8$  Hz, 1H), 7.56 (d,  $J = 7.5$  Hz, 2H), 7.49-7.43 (m, 3H), 7.35 (t,  $J = 15$  Hz, 2H), 7.31 (d,  $J = 7.5$  Hz, 1H), 7.01 (d,  $J = 7$  Hz, 1H), 6.94 (d,  $J = 7.5$  Hz, 3H), 5.77 (d,  $J = 3$  Hz, 1H), 5.41 (d,  $J = 15$  Hz, 1H), 4.56 (d,  $J = 15$  Hz, 1H), 3.92-3.76 (m, 2H), 3.41 (s, 3H), 0.77 (t,  $J = 7$  Hz, 3H);  $^{13}\text{C NMR}$  (125 MHz,  $\text{CDCl}_3$ )  $\delta$  179.8, 168.3, 160.9, 152.0, 142.4, 138.0, 137.1, 136.6, 128.6, 128.1, 127.6, 126.8, 126.0, 123.6, 122.8, 121.6, 120.5, 115.3, 107.0, 99.7, 74.8, 59.1, 55.0, 50.6, 44.3, 13.5. HRMS (TOF ES): Calcd for  $\text{C}_{30}\text{H}_{26}\text{N}_2\text{O}_4$  ( $\text{M}+1$ ) $^+$  507.1914 found 507.1925, error 2.16 ppm.

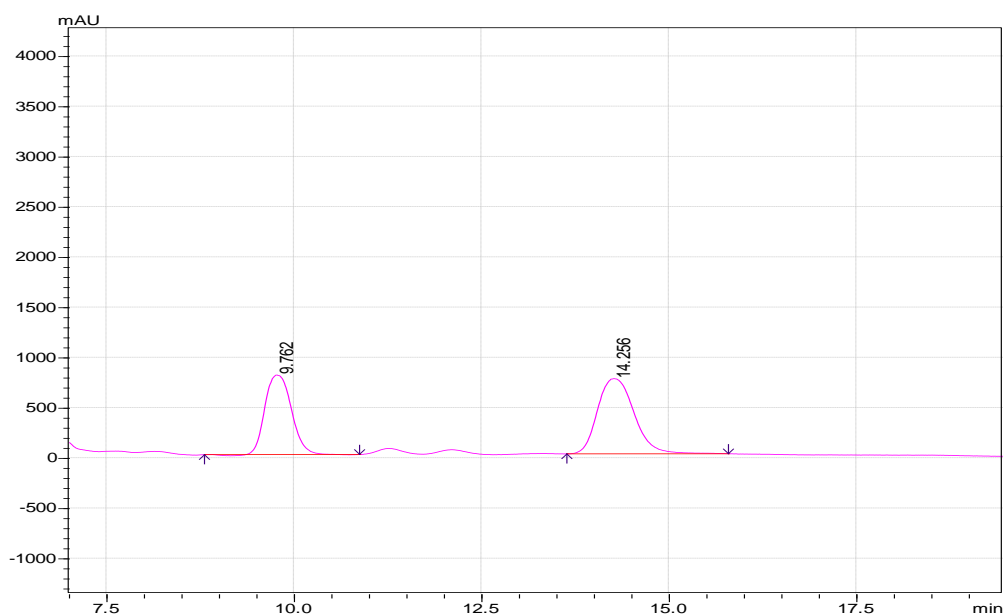

| Peak# | Ret. Time | Peak Start | Peak End | Area%   |
|-------|-----------|------------|----------|---------|
| 1     | 9.762     | 8.800      | 10.869   | 43.1674 |
| 2     | 14.256    | 13.632     | 15.787   | 56.8326 |



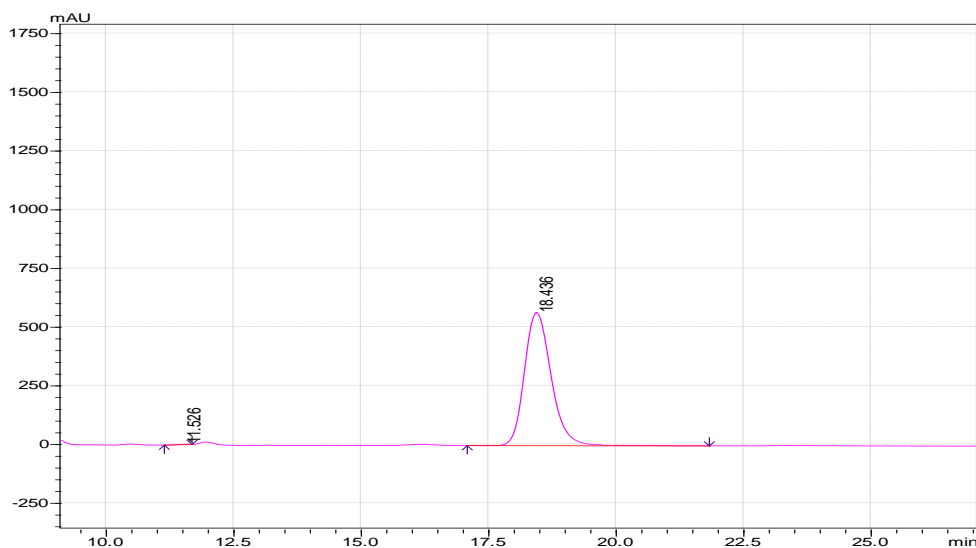

| Peak# | Ret. Time | Peak Start | Peak End | Area%   |
|-------|-----------|------------|----------|---------|
| 1     | 11.526    | 11.136     | 11.680   | 0.1535  |
| 2     | 18.436    | 17.077     | 21.824   | 99.8465 |

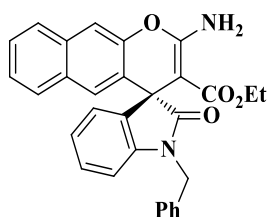

**3j**; Enantiomeric excess (92%) was determined by chiral HPLC (chiralpak IA), hexane-*i*PrOH 70:30, 0.7 mL/min, major enantiomer  $t_r = 26.0$  min, minor enantiomer  $t_r = 16.2$  min.;  $[\alpha]_D^{20} - 64$  ( $c = 1$ ) (92% ee);  $^1\text{H NMR}$  (500 MHz,  $\text{CDCl}_3$ )  $\delta$  7.71 (d,  $J = 9$  Hz, 1H), 7.65 (d,  $J = 8$  Hz, 1H), 7.58 (d,  $J = 6.5$  Hz, 2H), 7.36 (d,  $J = 7.5$ , 3H), 7.28 (d,  $J = 9$ Hz, 1H), 7.19-7.15 (m, 3H), 6.99 (t,  $J = 14.5$  Hz, 2H), 6.87 (t,  $J = 14.5$  Hz, 1H), 6.70 (t,  $J = 15$  Hz, 2H), 5.42 (d,  $J = 15$  Hz, 1H), 4.62 (d,  $J = 15$  Hz, 1H), 3.92-3.67 (m 2H), 0.82 (t,  $J = 14$  Hz, 3H).;  $^{13}\text{C NMR}$  (125 MHz,  $\text{CDCl}_3$ )  $\delta$  179.5, 168.3, 159.7, 147.2, 144.0, 136.5, 135.8, 131.6, 130.9, 129.2, 128.7, 127.9, 127.0, 124.4, 124.3, 123.6, 123.0, 117.1, 113.4, 108.0, 78.2, 59.4, 50.4, 45.3,

29.6, 14.0. HRMS (TOF ES): Calcd for  $C_{30}H_{25}N_2O_4$  (M+1)<sup>+</sup> 477.1808 found 477.1825, error 3.56 ppm.

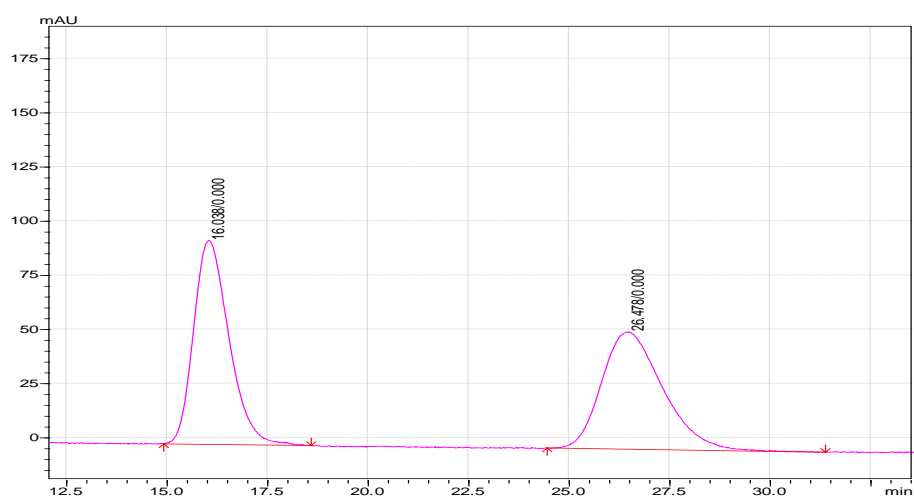

| Peak# | Ret. Time | Peak Start | Peak End | Area%   |
|-------|-----------|------------|----------|---------|
| 1     | 16.038    | 14.912     | 18.581   | 50.1661 |
| 2     | 26.478    | 24.448     | 31.371   | 49.8339 |

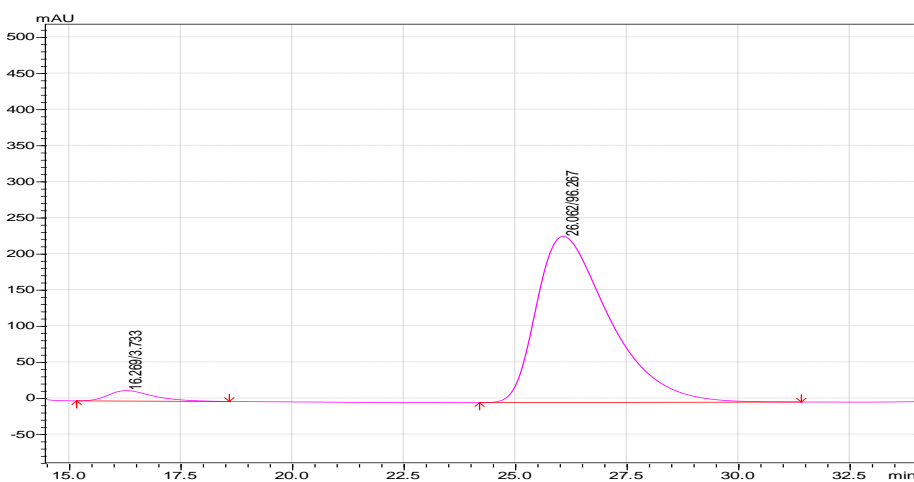

| Peak# | Ret. Time | Peak Start | Peak End | Area %  |
|-------|-----------|------------|----------|---------|
| 1     | 16.269    | 15.157     | 18.581   | 3.7328  |
| 2     | 26.062    | 24.192     | 31.403   | 96.2672 |

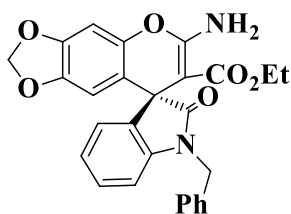

**4a**; Enantiomeric excess (94%) was determined by chiral HPLC (chiralpak IB), hexane-*i*PrOH 70:30, 0.7 mL/min, major enantiomer  $t_r = 12.2$  min, minor enantiomer  $t_r = 13.7$  min.;  $[\alpha]_D^{20} - 34$  ( $c = 1$ ) (92% ee);  $^1\text{H NMR}$  (500 MHz,  $\text{CDCl}_3$ )  $\delta$  7.47 (d,  $J = 7.5$  Hz, 2H), 7.35 (t,  $J = 15$  Hz, 2H), 7.29 (t,  $J = 15$  Hz, 1H), 7.14 (t,  $J = 15$  Hz, 1H), 6.99 (d,  $J = 7.5$  Hz, 1H), 6.93 (t,  $J = 14.5$  Hz, 1H), 6.84 (d,  $J = 8$  Hz, 1H), 6.50 (s, 1H), 5.94 (s, 1H), 5.84 (d,  $J = 12$  Hz, 2H), 5.15 (d,  $J = 15$  Hz, 1H), 4.70 (d,  $J = 15$  Hz, 1H), 3.90-3.83 (m, 1H), 3.59-3.53 (m, 1H), 0.56 (t,  $J = 14$  Hz, 3H);  $^{13}\text{C NMR}$  (125 MHz,  $\text{CDCl}_3$ ) 179.8, 168.3, 161.0, 147.6, 144.7, 142.9, 142.5, 138.3, 136.4, 128.7, 128.1, 127.7, 127.6, 123.3, 122.9, 113.5, 108.4, 105.1, 101.6, 97.9, 74.6, 60.3, 59.1, 53.3, 50.1, 44.4, 21.3, 13.4. HRMS (TOF ES): Calcd for  $\text{C}_{27}\text{H}_{23}\text{N}_2\text{O}_6$  ( $\text{M}+1$ ) $^+$  471.1550 found 471.1538, error 0.5 ppm.

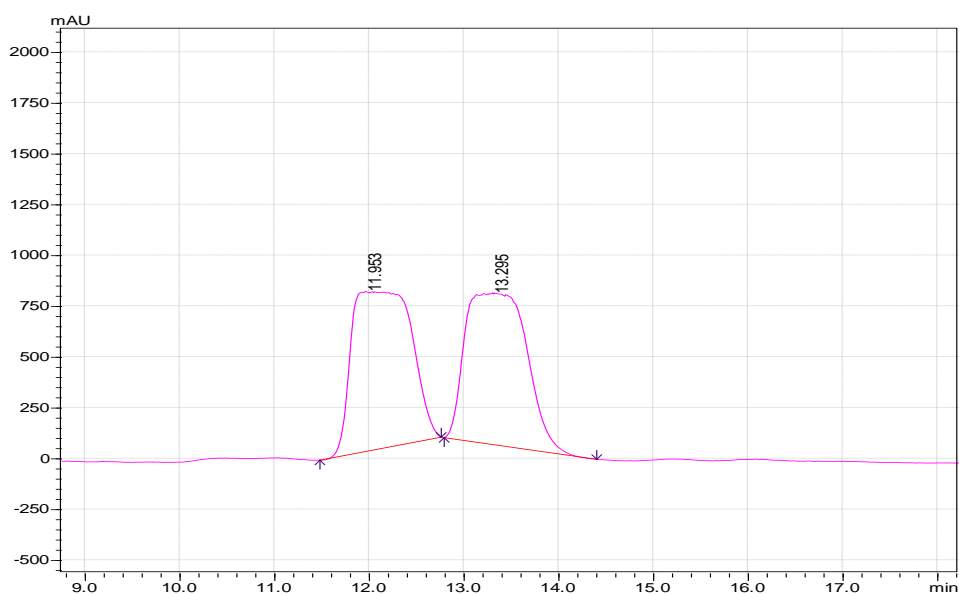

| Peak# | Ret. Time | Peak Start | Peak End | Area%   |
|-------|-----------|------------|----------|---------|
| 1     | 11.953    | 11.521     | 12.655   | 49.8962 |
| 2     | 13.296    | 12.823     | 14.457   | 50.1038 |

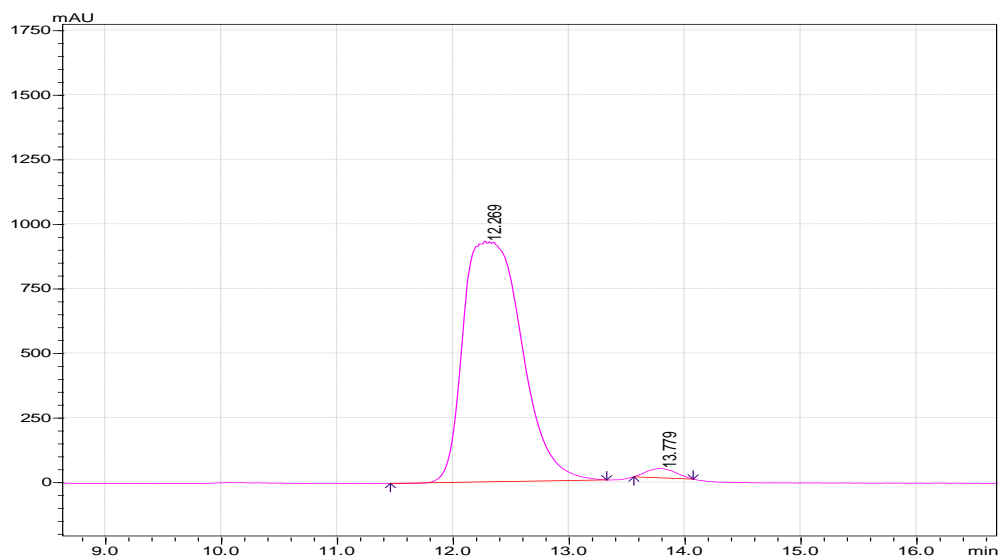

| Peak# | Ret. Time | Peak Start | Peak End | Area%   |
|-------|-----------|------------|----------|---------|
| 1     | 12.269    | 11.521     | 12.655   | 97.2345 |
| 2     | 13.779    | 12.823     | 14.457   | 2.7655  |

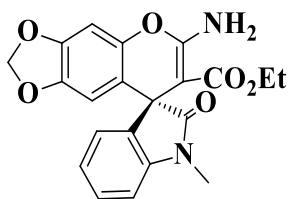

**4b**; Enantiomeric excess (98%) was determined by chiral HPLC (chiralpak IA), hexane-*i*-PrOH 70:30, 0.7 mL/min, major enantiomer  $t_r = 45.71$  min, minor enantiomer  $t_r = 16.09$  min.;  $[\alpha]_D^{25} = 68$  ( $c = 1$ ) (98% *ee*);  $^1\text{H NMR}$  (500 MHz,  $\text{CDCl}_3$ )  $\delta$  7.17–7.13 (m, 1H), 6.91–6.86 (m, 2H), 6.77 (d,  $J = 7.5$  Hz, 1H), 6.4 (s, 1H), 5.8 (s, 1H), 5.75 (s, 2H), 3.72–3.68 (q, 2H), 3.20 (s, 3H);  $^{13}\text{C NMR}$  (125 MHz,  $\text{CDCl}_3$ )  $\delta$  180.1, 168.4, 161.0, 147.6, 144.7, 143.3, 142.9, 138.3, 127.9, 123.3, 123.0, 13.5, 107.6, 105.1, 106.6, 98.0, 74.6, 59.3, 50.3, 26.6, 13.7. HRMS (TOF ES): Calcd for  $\text{C}_{27}\text{H}_{19}\text{N}_2\text{O}_6$  ( $\text{M}+1$ ) $^+$ , 395.1237 found 395.1266, error 7.33 ppm.

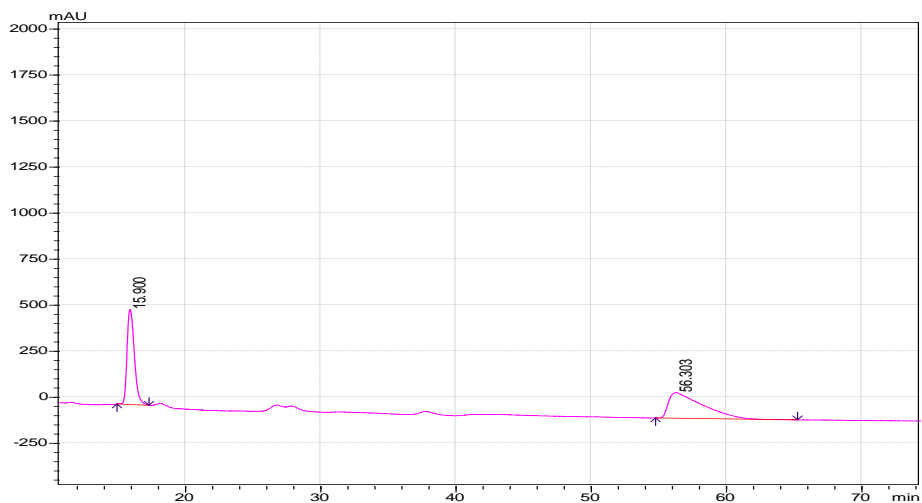

| Peak# | Ret. Time | Peak Start | Peak End | Area%   |
|-------|-----------|------------|----------|---------|
| 1     | 15.900    | 14.933     | 17.301   | 50.0005 |
| 2     | 56.303    | 54.752     | 65.248   | 49.9995 |

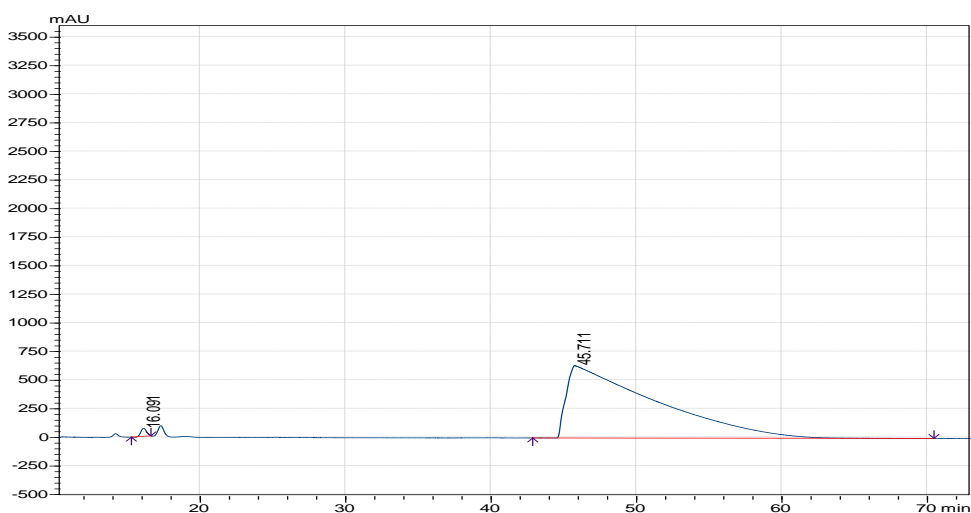

| Peak# | Ret. Time | Peak Start | Peak End | Area%   |
|-------|-----------|------------|----------|---------|
| 1     | 16.091    | 15.264     | 16.608   | 0.6996  |
| 2     | 45.711    | 42.859     | 70.453   | 99.3004 |

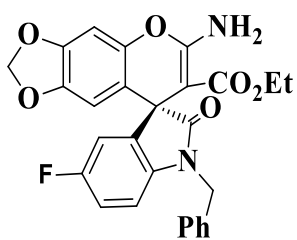

**4c**; Enantiomeric excess (97 %) was determined by chiral HPLC (chiralpak IA), hexane-*i*-PrOH 70:30, 0.7 mL/min, major enantiomer  $t_r = 57.1$  min, minor enantiomer  $t_r = 19.6$  min.;  $[\alpha]_D^{25} = -17.4$  ( $c = 1$ ) (97% *ee*);  $^1\text{H NMR}$  (500 MHz,  $\text{CDCl}_3$ )  $\delta$  7.43 (d,  $J = 8$  Hz, 2H), 7.31 (t,  $J = 15$  Hz, 2H), 7.24 (d,  $J = 12$  Hz, 1H), 6.90 (d,  $J = 7.5$  Hz, 1H), 6.76(s, 1H), 6.69(d,  $J = 8$  Hz, 1H), 6.47(s, 1H), 5.91(s, 1H), 5.81(d,  $J = 9.5$  Hz, 2H), 5.11(d,  $J = 15$  Hz, 1H), 4.62(d,  $J = 15.5$  Hz, 1H), 3.86-3.80(m, 1H), 3.60-3.53(m, 1H), 0.57(t,  $J = 14$  Hz, 3H).  $^{13}\text{C NMR}$  125MHz, $\text{CDCl}_3$ ) $\delta$  179.9, 168.5, 161.0, 147.6, 144.8, 142.9, 140.2, 138.3, 136.6, 132.5, 128.7, 128.2, 127.9, 127.8, 124.2, 113.9, 108.2, 105.3, 101.1, 98.0, 74.9, 59.3, 53.4, 50.3, 44.5, 39.7, 21.0, 13.6. HRMS (TOF ES): Calcd for  $\text{C}_{27}\text{H}_{23}\text{N}_2\text{O}_6$  ( $\text{M}+1$ ) $^+$  489.1456 found 489.1487, error 6.3 ppm

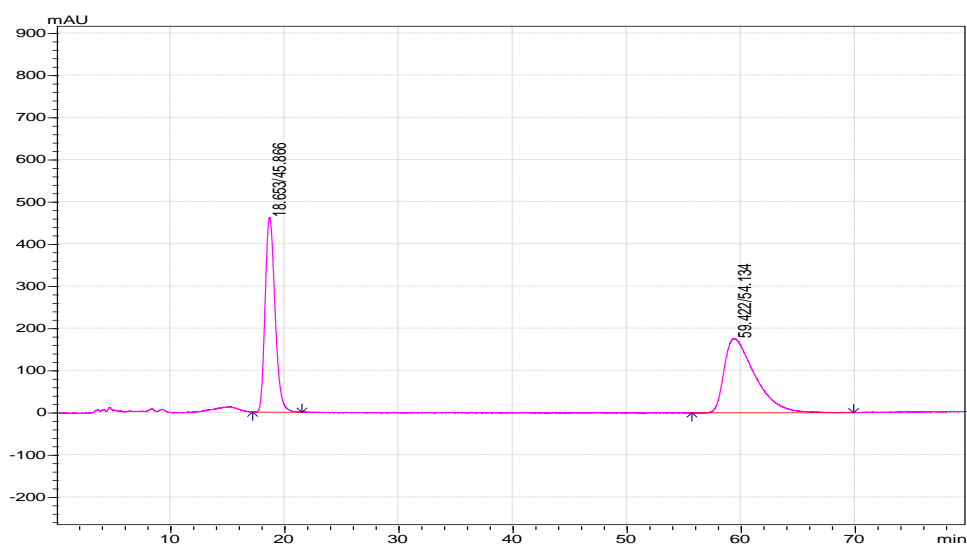

| Peak# | Ret. Time | Area     | Peak Start | Peak End | Area%   |
|-------|-----------|----------|------------|----------|---------|
| 1     | 18.653    | 27870737 | 17.163     | 21.493   | 45.8658 |
| 2     | 59.422    | 32895061 | 55.669     | 69.856   | 54.1342 |

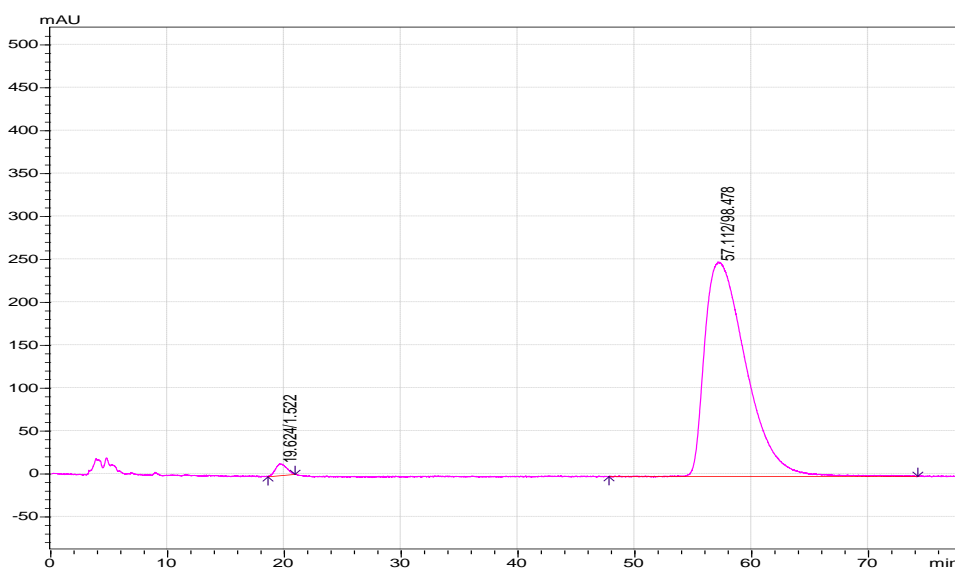

| Peak# | Ret. Time | Area     | Peak Start | Peak End | Area%   |
|-------|-----------|----------|------------|----------|---------|
| 1     | 19.624    | 945443   | 18.592     | 20.917   | 1.5222  |
| 2     | 57.112    | 61166462 | 47.787     | 74.229   | 98.4778 |

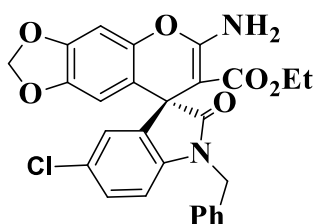

**4d**; Enantiomeric excess (98%) was determined by chiral HPLC (chiralpak IA), hexane-*i*PrOH 70:30, 0.7 mL/min, major enantiomer  $t_r = 41.2$  min, minor enantiomer  $t_r = 15.3$  min.;  $[\alpha]_D^{25} = -19$  ( $c = 1$ ) (98% ee);  $^1\text{H NMR}$  (500 MHz,  $\text{CDCl}_3$ )  $\delta$  7.41(d,  $J = 7.5$  Hz, 2H), 7.33(t,  $J = 14.5$  Hz, 2H), 7.30(d,  $J = 7.5$  Hz, 1H), 7.10-7.08 (m, 1H), 6.94 (d,  $J = 2$  Hz, 1H), 6.73(d,  $J = 8.5$ , 1H), 6.49(s, 1H), 5.88 (s, 1H), 5.85 (d,  $J = 1.5$  Hz, 1H), 5.43 (d,  $J = 1.5$  Hz, 1H), 5.11 (d,  $J = 15$  Hz, 1H), 4.64 (d,  $J = 15$  Hz, 1H), 3.90-3.84 (m, 1H), 3.61-3.55(m, 1H), 0.60 (t,  $J = 14$  Hz, 3H);  $^{13}\text{C NMR}$  (125 MHz,  $\text{CDCl}_3$ ) 179.5, 168.2, 161.1, 147.9, 144.9, 142.9, 141.2, 139.9, 126.1, 128.9, 128.4, 128.2, 128.0, 127.7, 124.0, 112.8, 109.4, 105.0, 101.8, 98.2, 74.2, 59.4, 50.5, 46.6, 31.6, 29.7, 22.7, 14.1. HRMS (TOF ES): Calcd for  $\text{C}_{27}\text{H}_{22}\text{N}_2\text{O}_6\text{Cl}$  ( $\text{M}+1$ )<sup>+</sup> 505.1160 found 505.1155, error -1.18 ppm

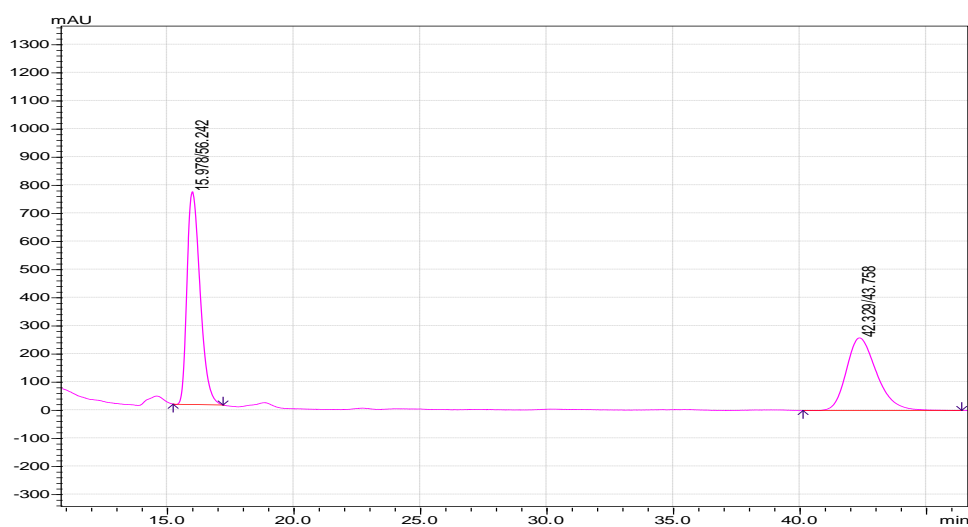

| Peak# | Ret. Time | Area     | Peak Start | Peak End | Area%   |
|-------|-----------|----------|------------|----------|---------|
| 1     | 15.978    | 27435477 | 15.221     | 17.195   | 56.2420 |
| 2     | 42.329    | 21345642 | 40.117     | 46.389   | 43.7580 |

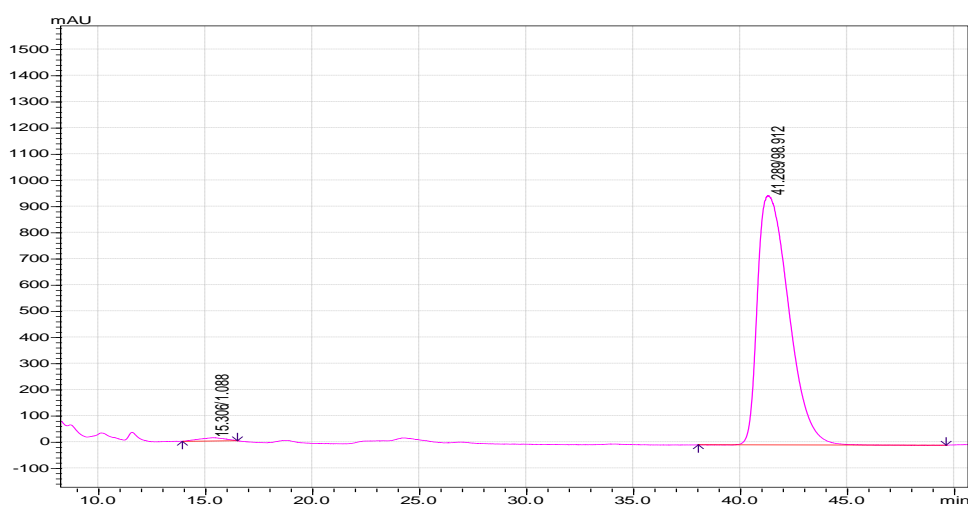

| Peak# | Ret. Time | Area     | Peak Start | Peak End | Area%   |
|-------|-----------|----------|------------|----------|---------|
| 1     | 15.306    | 1061986  | 13.909     | 16.480   | 1.0883  |
| 2     | 41.289    | 96519695 | 38.027     | 49.611   | 98.9117 |

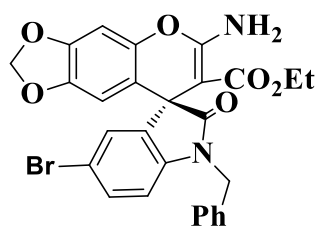



**4e**; Enantiomeric excess (93%) was determined by chiral HPLC (chiralpak IC), hexane-*i*PrOH 70:30, 0.7 mL/min, major enantiomer  $t_r = 24.5$  min, minor enantiomer  $t_r = 15.6$  min.;

$[\alpha]_D^{25} = -52$  ( $c = 1$ ) (93% *ee*);  $^1\text{H NMR}$  (500 MHz,  $\text{CDCl}_3$ )  $\delta$  7.43(d,  $J = 7.5$  Hz, 2H), 7.35(t,  $J = 14.5$  Hz, 2H), 7.31(d,  $J = 7$  Hz, 1H), 7.28-7.26(m, 2H), 7.10(d,  $J = 2$  Hz, 1H), 6.71(d,  $J = 8.5$  Hz, 1H), 6.52(s, 1H), 5.90 (s, 1H), 5.87(d,  $J = 8$ Hz, 2H), 5.13(d,  $J = 15.5$  Hz, 1H), 4.66 (d,  $J = 15$  Hz, 1H), 3.92-3.60(m, 1H), 3.67-3.60 (m, 1H), 0.63(t,  $J = 14$  Hz, 3H);  $^{13}\text{C NMR}$  (125MHz,  $\text{CDCl}_3$ )  $\delta$  179.9, 168.8, 161.0, 147.9, 144.9, 142.9, 141.6, 140.2, 136.0, 130.5, 128.8, 128.0, 126.7, 115.6, 112.6, 109.9, 104.9, 101.7, 98.16, 74.1, 59.4, 50.3, 44.6, 13.6. HRMS (TOF ES): Calcd for  $\text{C}_{27}\text{H}_{21}\text{N}_2\text{O}_6\text{Br}$  ( $\text{M}+1$ ) $^+$  549.0655 found 549.0619, error 6.5 ppm.

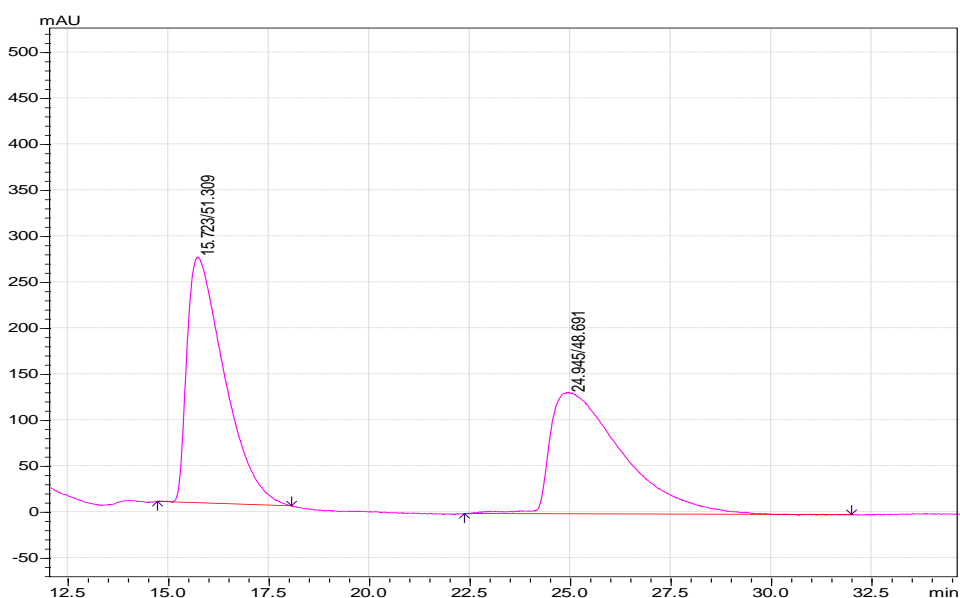

| Peak# | Ret. Time | Area     | Peak Start | Peak End | Area%   |
|-------|-----------|----------|------------|----------|---------|
| 1     | 15.723    | 17284176 | 14.720     | 18.059   | 51.3086 |
| 2     | 24.945    | 16402542 | 22.357     | 31.989   | 48.6914 |

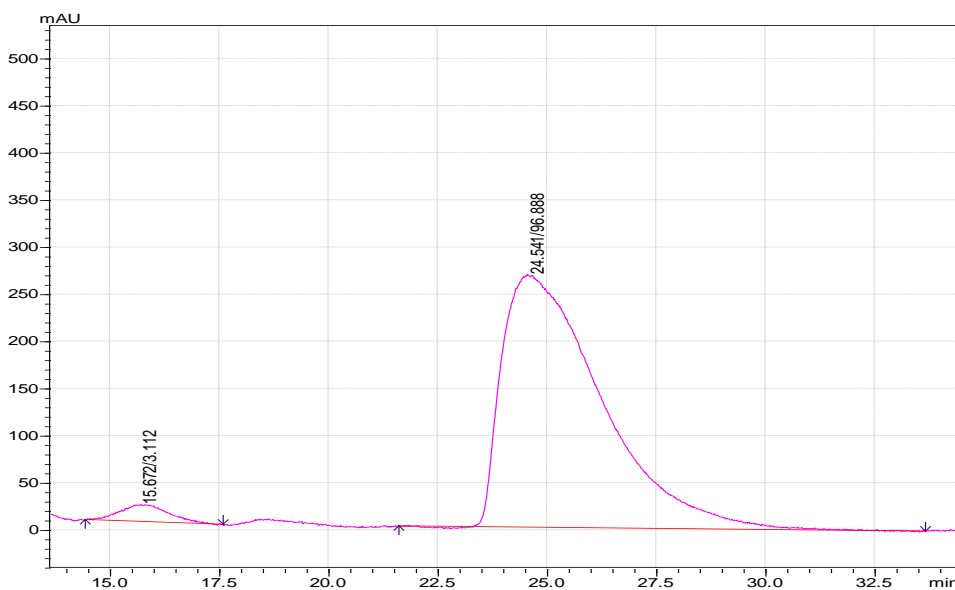

| Peak# | Ret. Time | Area     | Peak Start | Peak End | Area%   |
|-------|-----------|----------|------------|----------|---------|
| 1     | 15.672    | 1355339  | 14.421     | 17.579   | 3.1115  |
| 2     | 24.541    | 42203552 | 21.600     | 33.653   | 96.8885 |

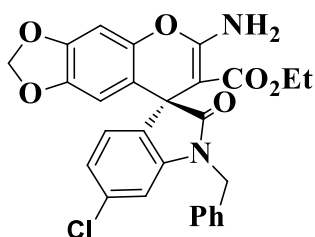

**4f**; Enantiomeric excess (95%) was determined by chiral HPLC (chiralpak IC), hexane-*i*-PrOH 70:30, 0.7 mL/min, major enantiomer  $t_r = 37.7$  min, minor enantiomer  $t_r = 17.9$  min.;  $[\alpha]_D^{25} = -44$  ( $c = 1$ ) (95% ee);  $^1\text{H NMR}$  (500 MHz,  $\text{CDCl}_3$ )  $\delta$  7.37(d,  $J = 7$  Hz, 2H), 7.29 (t,  $J = 15$  Hz, 2H), 7.23 (t,  $J = 14.5$  Hz, 1H), 6.83 (s, 2H), 6.76 (s, 1H), 6.41 (s, 1H), 5.82 (s, 1H), 5.75 (d,  $J = 1.5$  Hz, 1H), 5.05 (d,  $J = 15$  Hz, 1H), 4.58 (d,  $J = 15$  Hz, 1H), 3.83-3.77 (m, 1H), 3.56-3.50 (m, 1H), 0.56 (t,  $J = 14$  Hz, 3H);  $^{13}\text{C NMR}$  (125 MHz,  $\text{CDCl}_3$ ) 179.9, 168.2, 161.1, 147.9, 144.9, 143.8, 142.9, 136.8, 135.9, 133.3, 128.2, 128.1, 124.4, 122.9, 113.0, 109.0, 104.9, 101.8, 98.1, 74.1, 59.4, 44.6, 13.7. HRMS (TOF ES): Calcd for  $\text{C}_{27}\text{H}_{22}\text{N}_2\text{O}_6\text{Cl}$  ( $\text{M}+1$ ) $^+$  505.1161 found 505.1162, error 0.19 ppm.

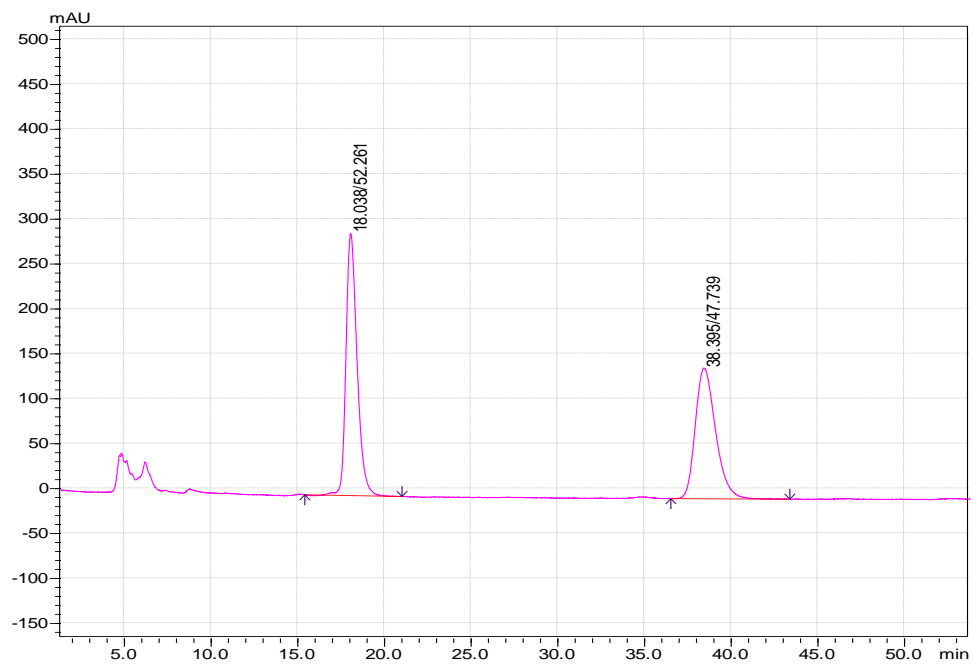

| Peak# | Ret. Time | Area     | Peak Start | Peak End | Area%   |
|-------|-----------|----------|------------|----------|---------|
| 1     | 18.038    | 12970155 | 15.403     | 21.013   | 52.2614 |
| 2     | 38.395    | 11847714 | 36.523     | 43.381   | 47.7386 |

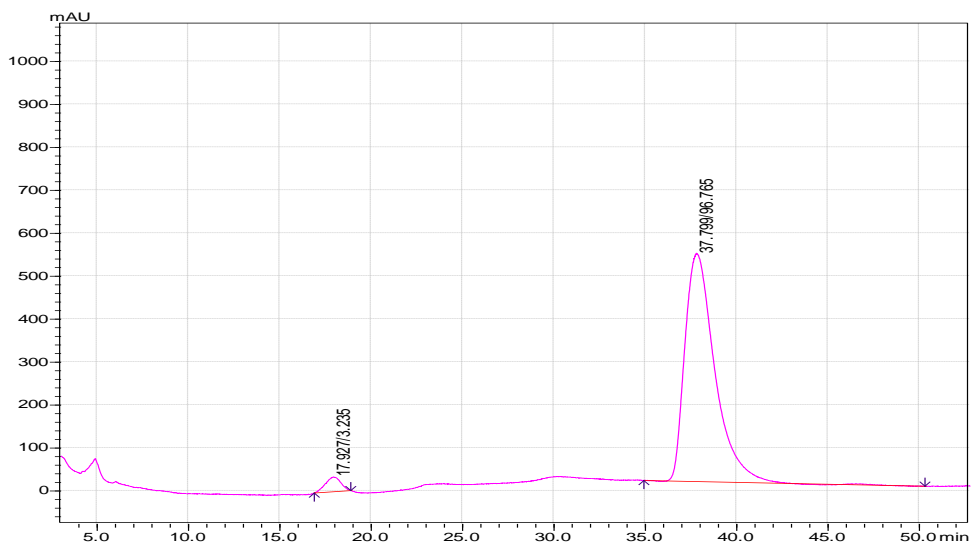

| Peak# | Ret. Time | Area     | Peak Start | Peak End | Area%   |
|-------|-----------|----------|------------|----------|---------|
| 1     | 17.927    | 2022961  | 16.885     | 18.880   | 3.2347  |
| 2     | 37.799    | 60515725 | 34.923     | 50.304   | 96.7653 |

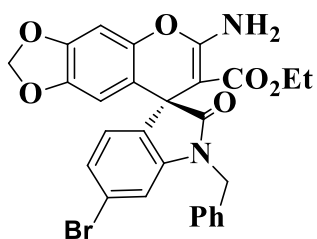

**4g**; Enantiomeric excess (99%) was determined by chiral HPLC (chiralpak IA), hexane-*i*-PrOH 70:30, 0.7 mL/min, major enantiomer  $t_r = 40$  min, minor enantiomer  $t_r = 11$  min.;  $[\alpha]_D^{25} = -28$  ( $c = 1$ ) (99% ee);  $^1\text{H NMR}$  (500 MHz,  $\text{CDCl}_3$ )  $\delta$  7.45(d,  $J = 9$  Hz, 2H), 7.37(t,  $J = 15$  Hz, 2H), 7.31(t,  $J = 14.5$  Hz, 1H), 6.91(s, 2H), 6.84(s, 1H), 6.50(s, 1H), 5.90(s, 1H), 5.86(d,  $J = 10$  Hz, 2H), 5.13(d,  $J = 15$  Hz, 1H), 4.65(d,  $J = 15.5$  Hz, 1H), 3.911-3.59(m, 2H), 0.64(t,  $J = 14$  Hz, 3H);  $^{13}\text{C NMR}$  (125 MHz,  $\text{CDCl}_3$ )  $\delta$  179.8, 168.2, 161.0, 147.8, 144.9, 143.8, 142.9, 136.7, 135.9, 133.2, 124.3, 122.8, 113.0, 108.9, 104.9, 101.7, 98.1, 74.2, 59.4, 49.9, 44.6, 13.6. HRMS (TOF ES): Calcd for  $\text{C}_{27}\text{H}_{21}\text{N}_2\text{O}_6\text{Br}$  ( $\text{M}+1$ ) $^+$  549.0655 found 549.0706, error 9.2 ppm.

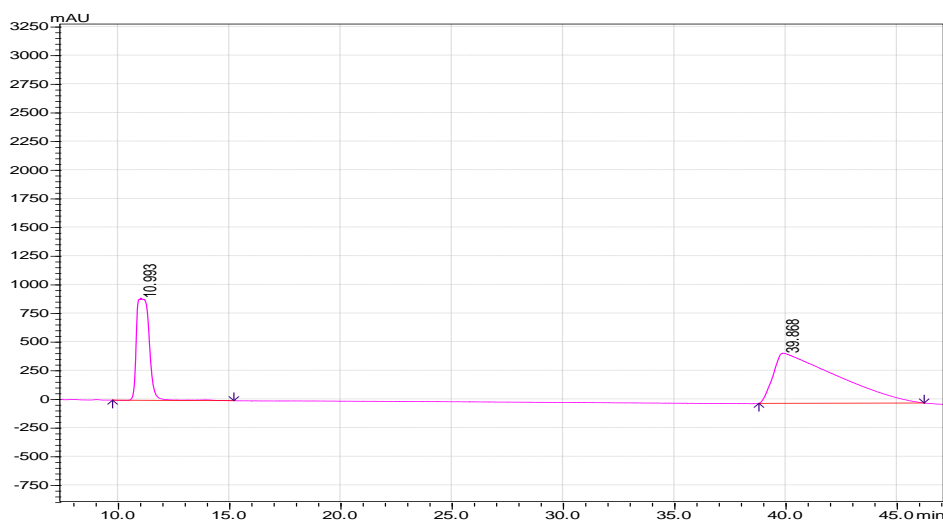

| Peak# | Ret. Time | Peak Start | Peak End | Area%   |
|-------|-----------|------------|----------|---------|
| 1     | 10.993    | 9.739      | 15.189   | 49.8962 |
| 2     | 39.868    | 38.784     | 46.208   | 50.1038 |

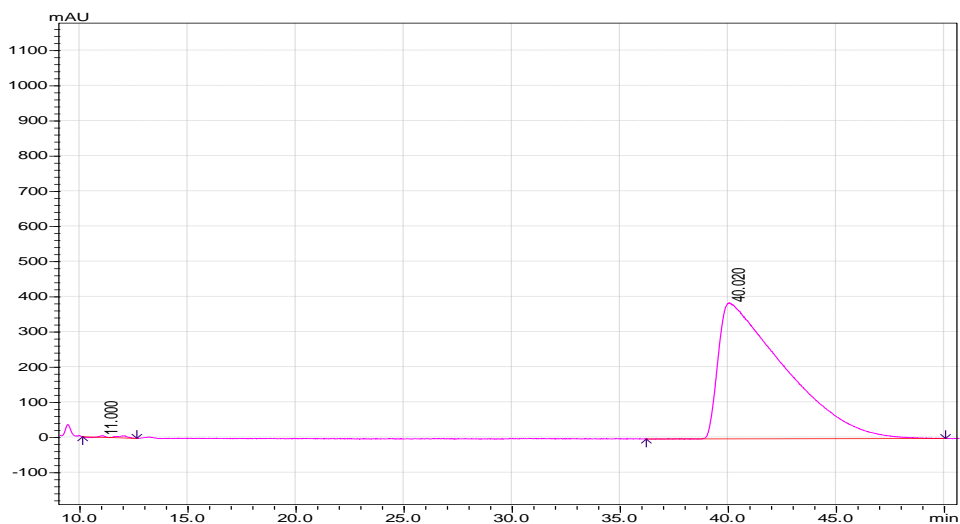

| Peak# | Ret. Time | Peak Start | Peak End | Area%   |
|-------|-----------|------------|----------|---------|
| 1     | 11.000    | 10.123     | 12.629   | 0.2725  |
| 2     | 40.020    | 36.203     | 50.048   | 99.7275 |

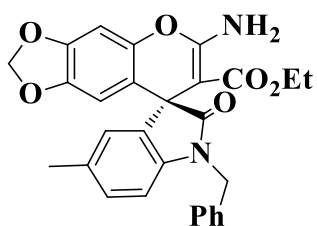

**4h**; Enantiomeric excess (97%) was determined by chiral HPLC (chiralpak IC), hexane-*i*-PrOH 60:40, 0.8 mL/min, major enantiomer  $t_r = 15.879$  min, minor enantiomer  $t_r = 10.205$  min.;  $[\alpha]_D^{25} = 68$  ( $c = 1$ ) (97% *ee*);  $^1\text{H NMR}$  (500 MHz,  $\text{CDCl}_3$ )  $\delta$  7.71(d,  $J = 8$  Hz, 2H), 7.43(d,  $J = 8$  Hz, 2H), 7.31(t,  $J = 15$  Hz, 2H), 7.24(d,  $J = 12$  Hz, 1H), 6.90(d,  $J = 7.5$  Hz, 1H), 6.76(s, 1H), 6.69(d,  $J = 8$  Hz, 1H), 6.47(s, 1H), 5.91(s, 1H), 5.81(d,  $J = 9.5$  Hz, 2H), 5.11(d,  $J = 15$  Hz, 1H), 4.62(d,  $J = 15.5$  Hz, 1H), 3.86-3.80 (m, 1H), 3.60-3.53 (m, 1H), 2.16 (s, 3H), 0.575 (t,  $J = 14$  Hz, 3H);  $^{13}\text{C NMR}$  (125 MHz,  $\text{CDCl}_3$ ) 179.9, 168.5, 161.0, 147.6, 144.8, 142.9, 140.2, 140.2, 138.3, 136.6, 132.5, 128.7, 128.2, 127.9, 127.8, 124.2, 113.9, 108.2, 105.3, 101.1, 98.0, 74.9, 59.3, 53.4, 50.3, 44.5, 29.9, 21.0, 13.6. HRMS (TOF ES): Calcd for  $\text{C}_{28}\text{H}_{25}\text{N}_2\text{O}_6$  ( $\text{M}+1$ )<sup>+</sup> 485.1707 found 485.1731, error 4.9 ppm

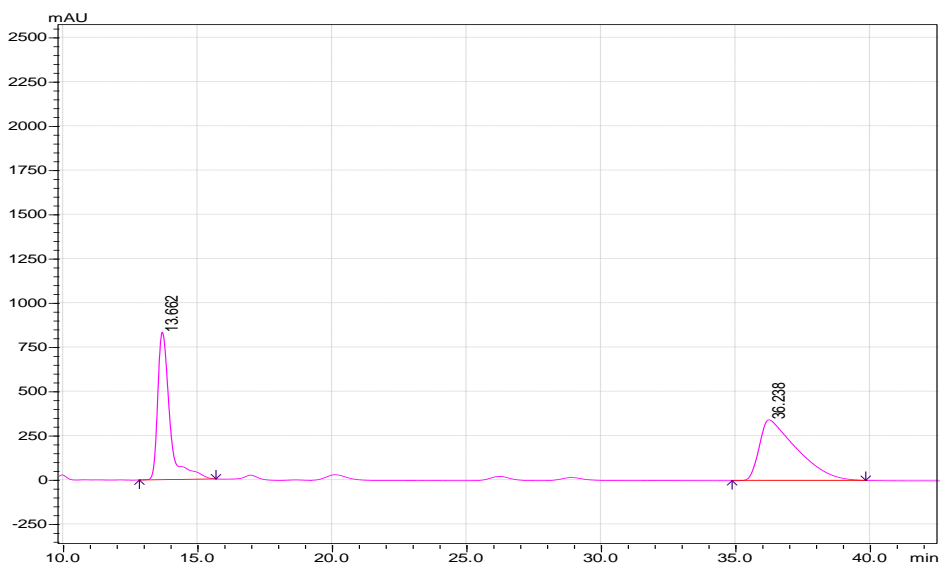

| Peak | Ret. Time | Peak Start | Peak End | Area%   |
|------|-----------|------------|----------|---------|
| 1    | 13.662    | 12.821     | 15.669   | 44.2722 |
| 2    | 36.238    | 34.859     | 39.829   | 55.7278 |

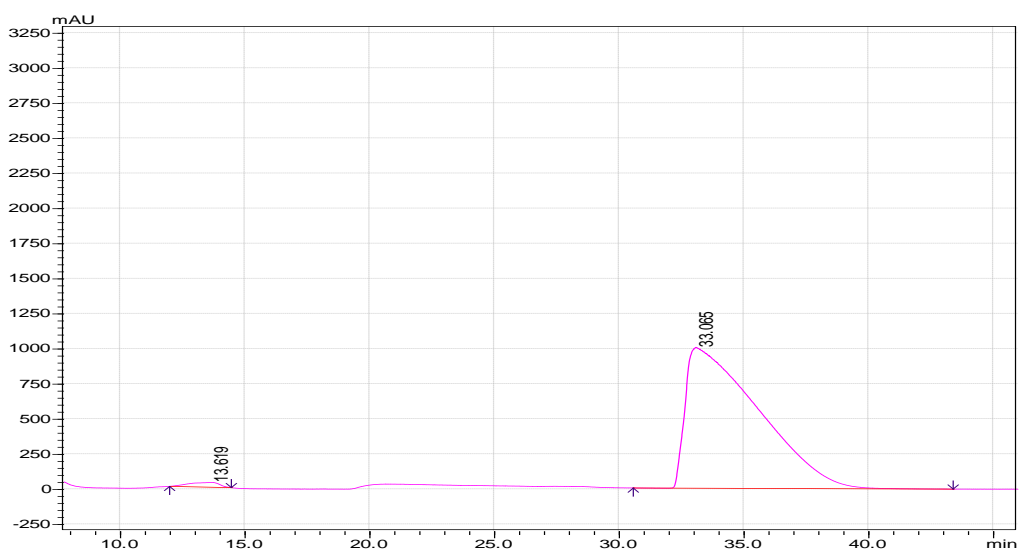

| Peak | Ret. Time | Peak Start | Peak End | Area %  |
|------|-----------|------------|----------|---------|
| 1    | 13.619    | 11.968     | 14.443   | 1.3680  |
| 2    | 33.065    | 30.560     | 43.381   | 98.6320 |

# <sup>1</sup>H NMR and <sup>13</sup>C NMR spectrum of compounds

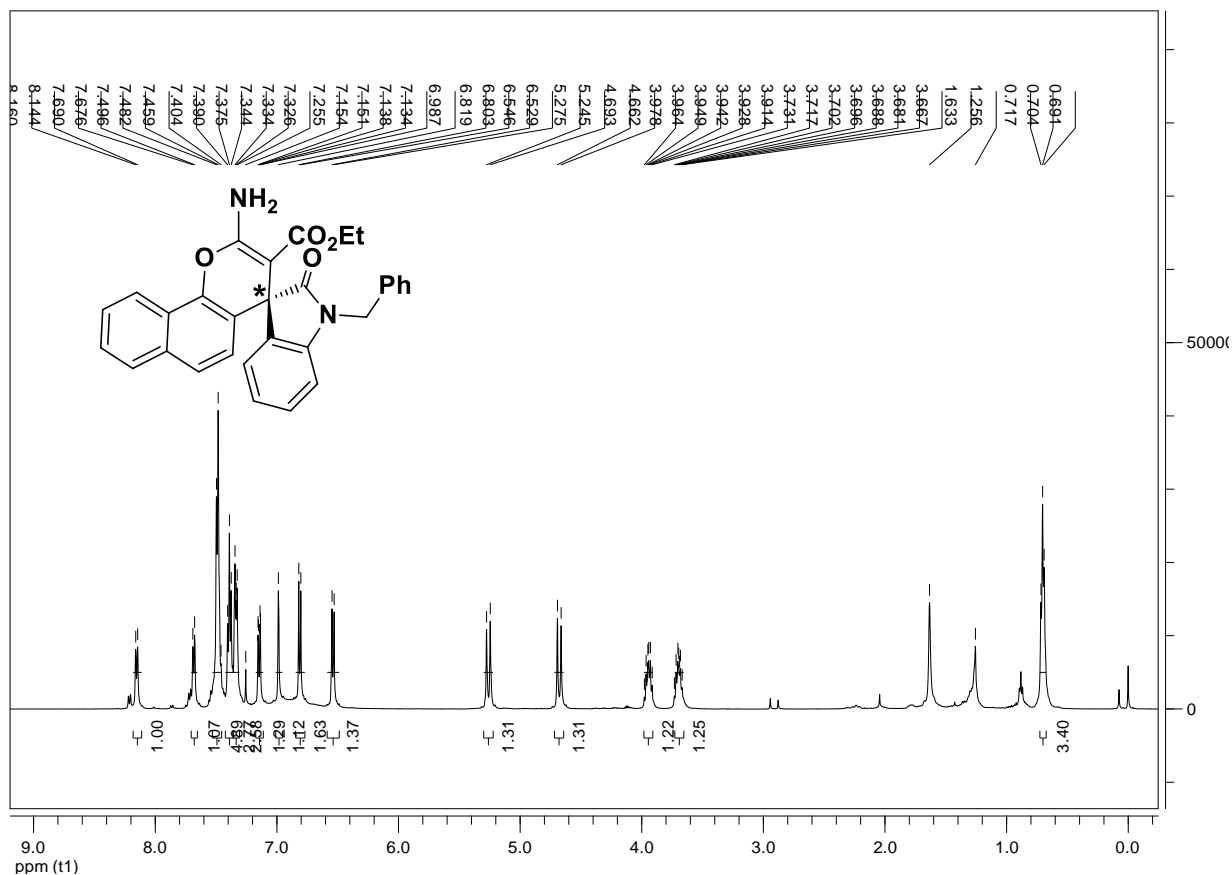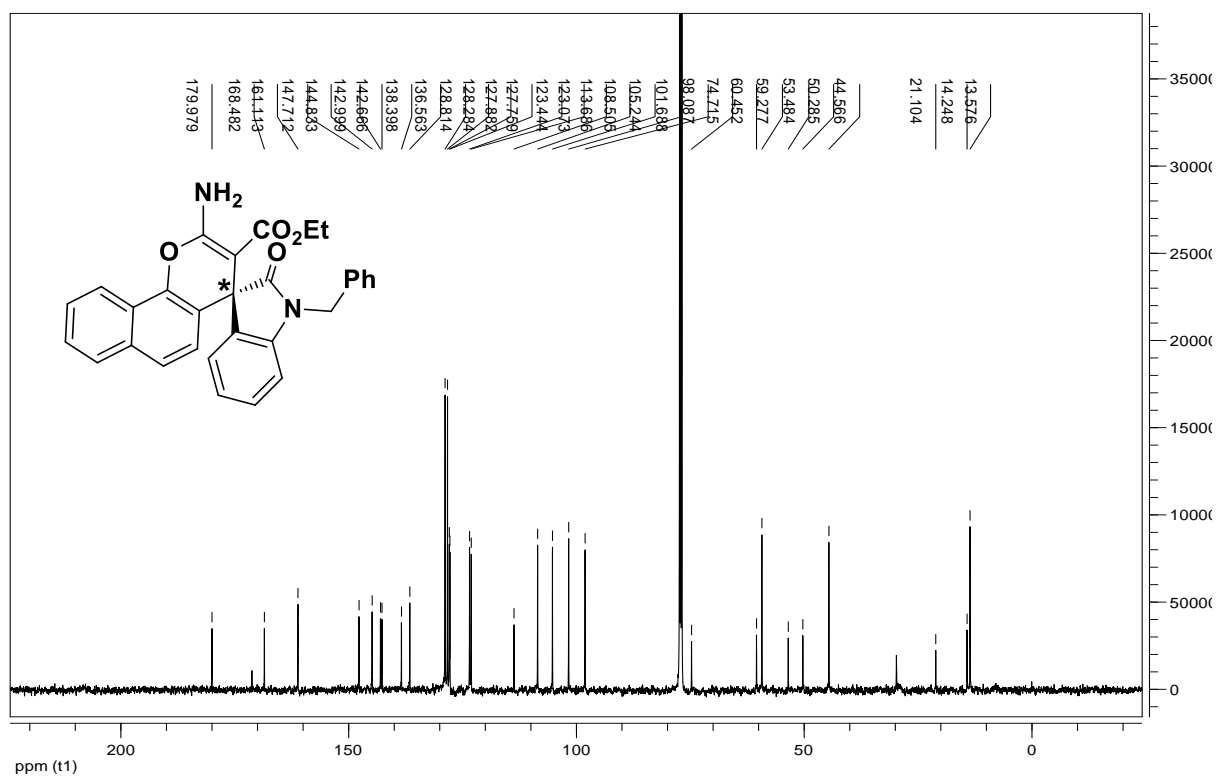

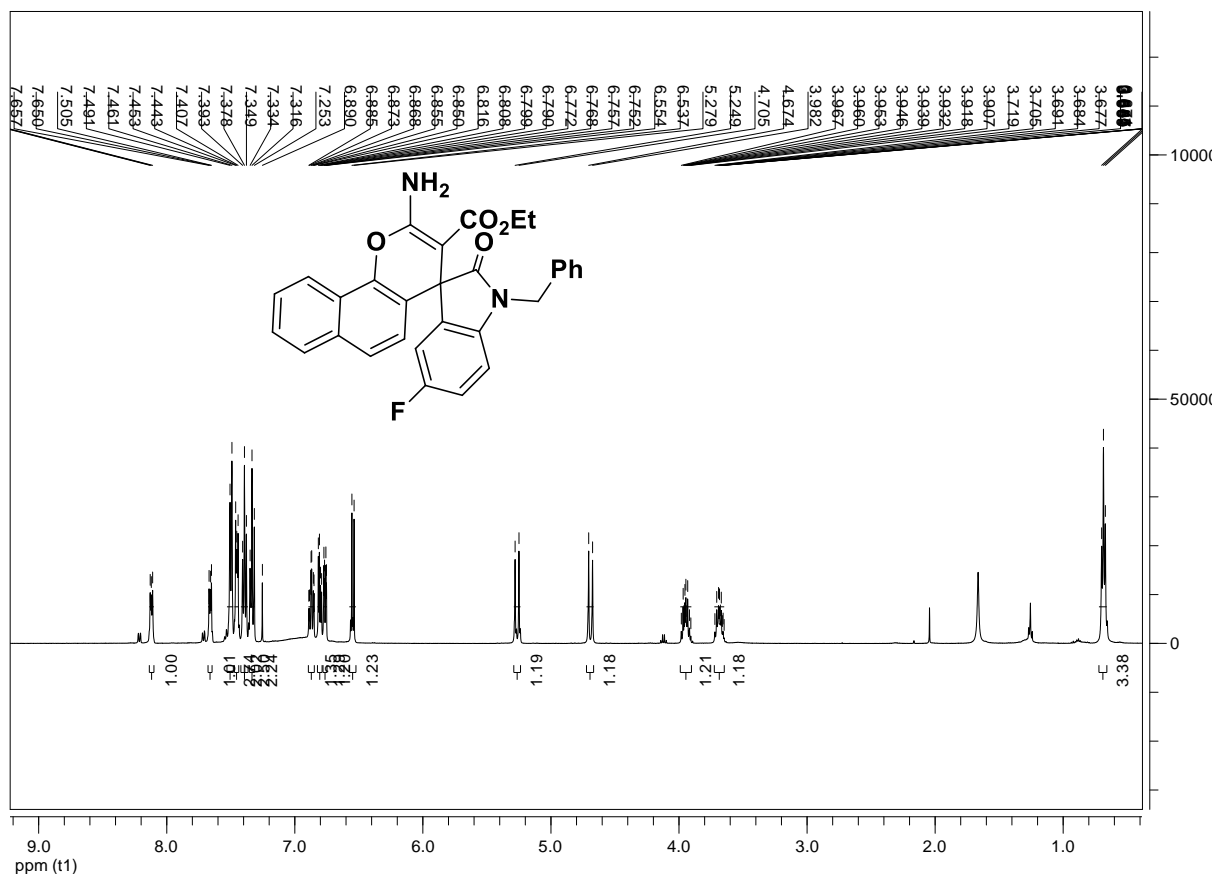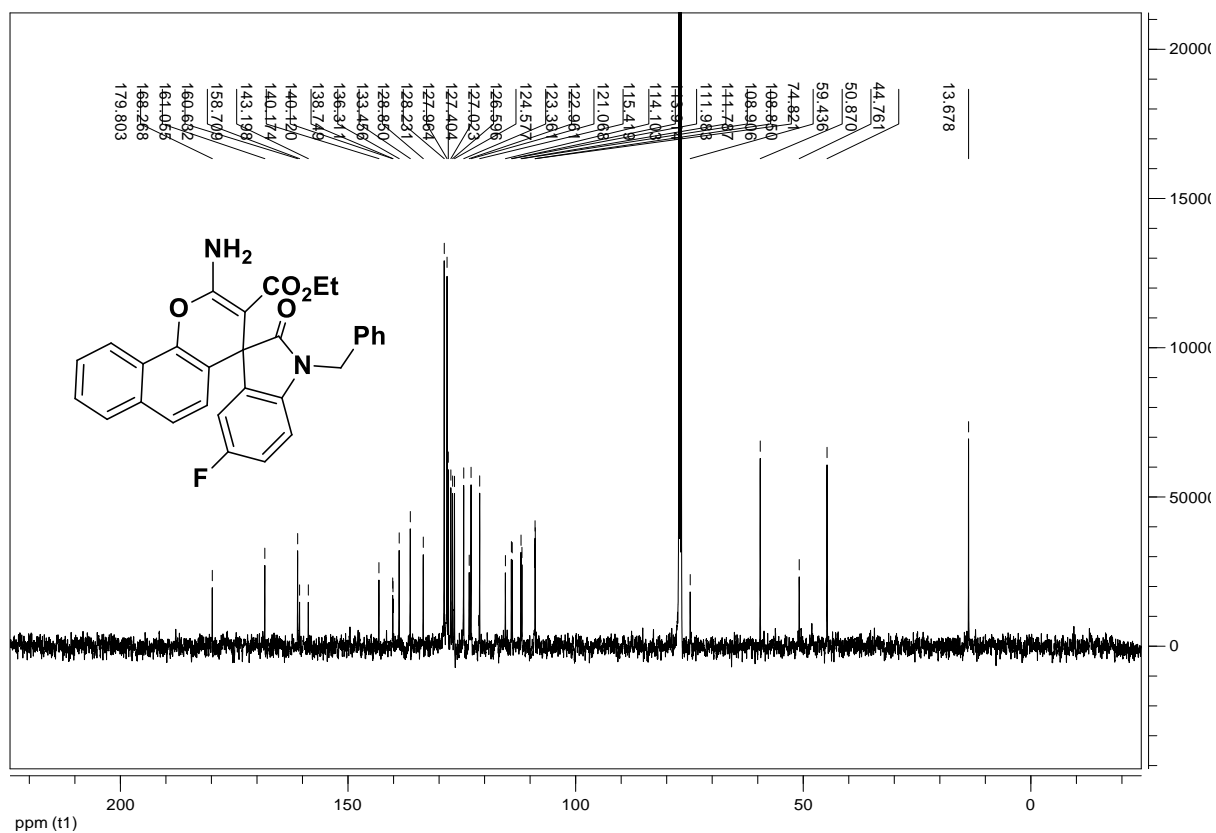



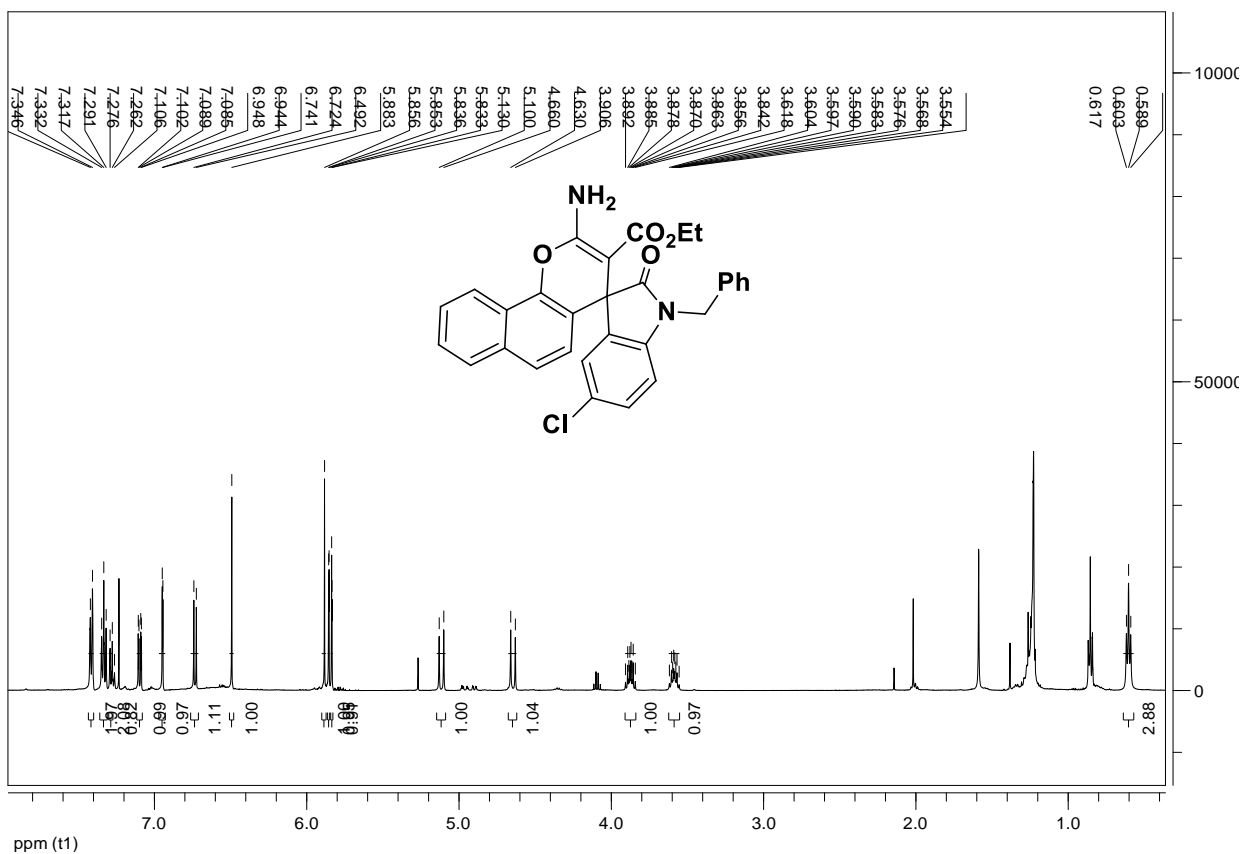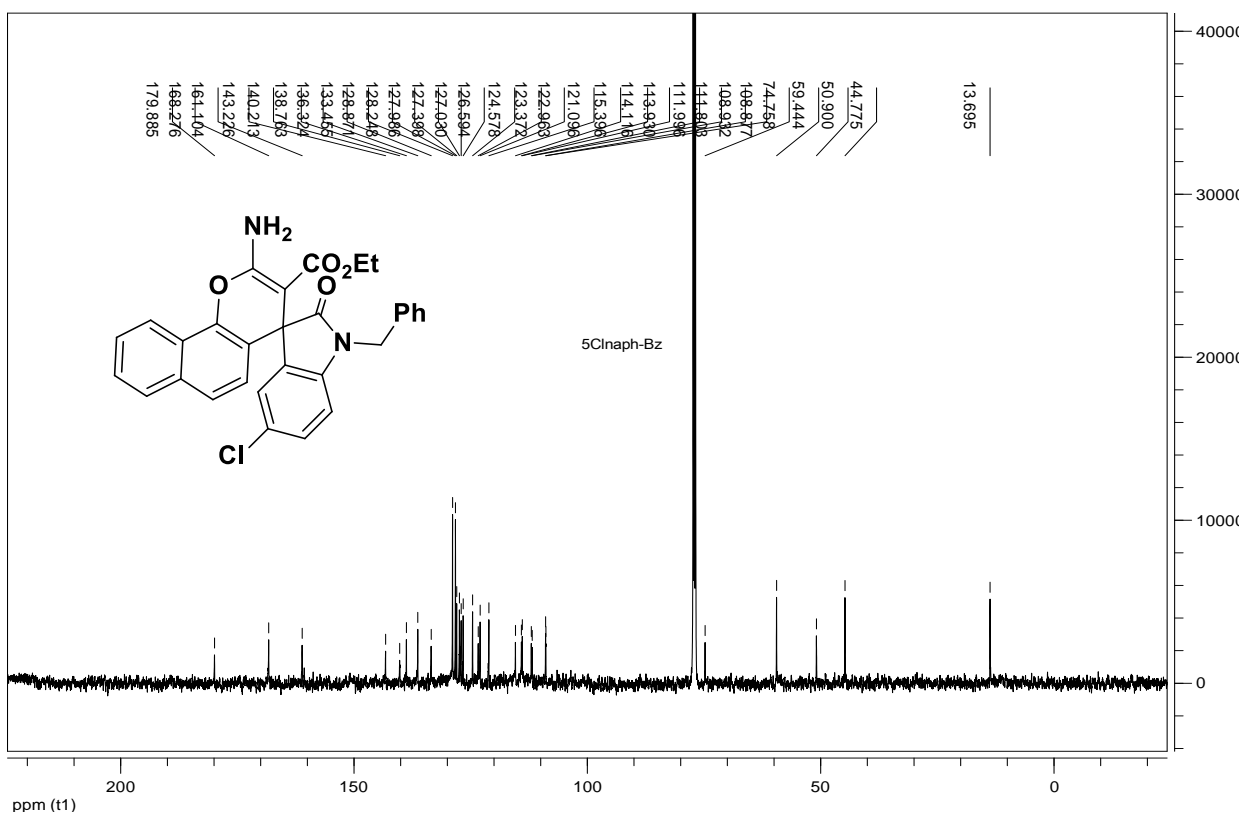

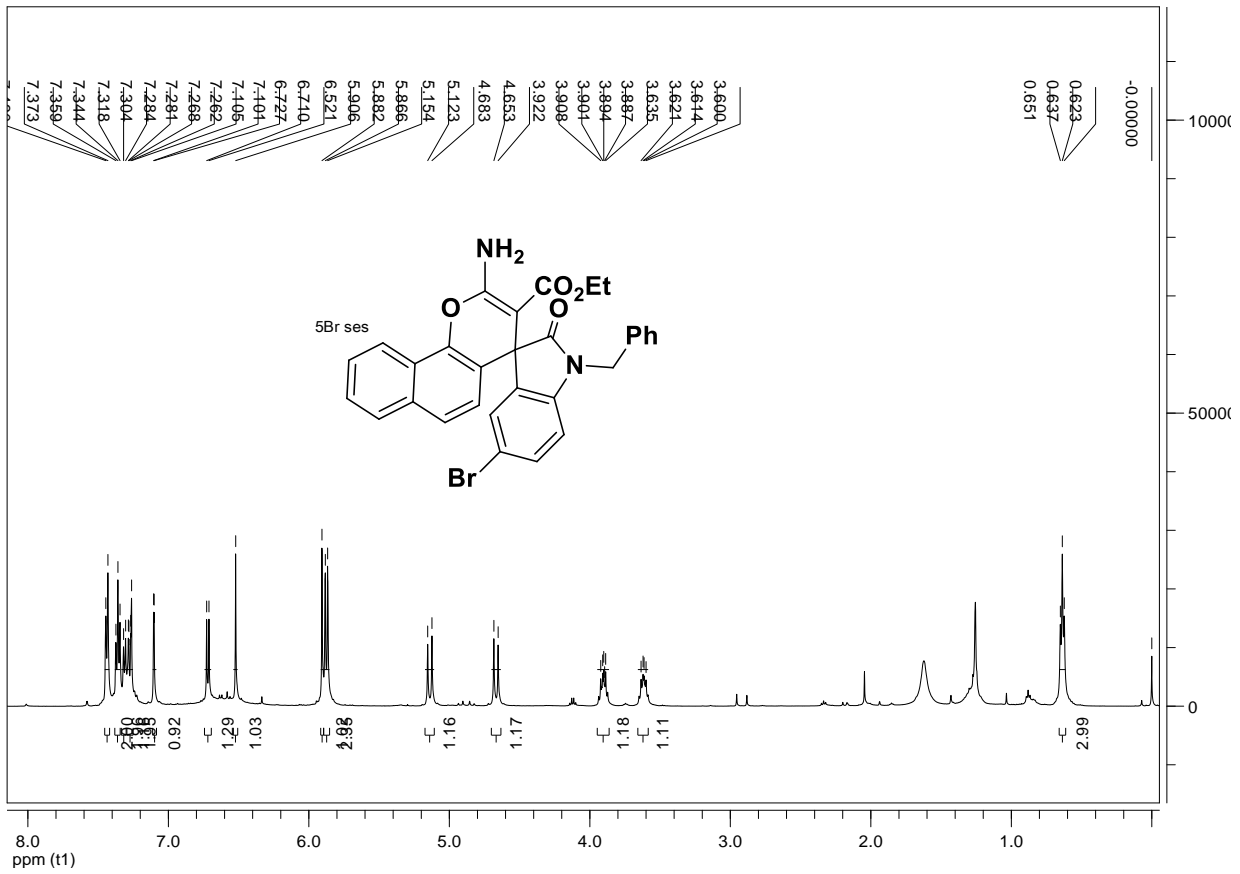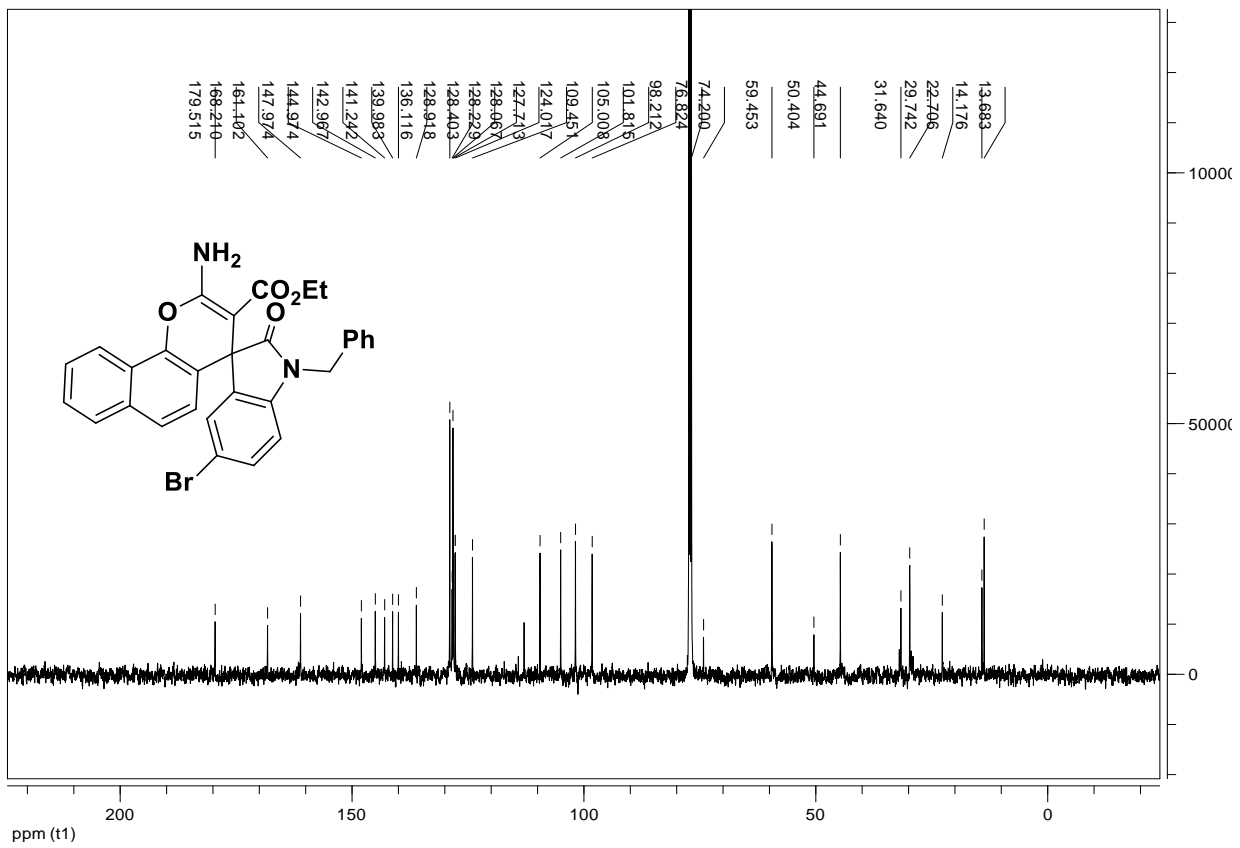

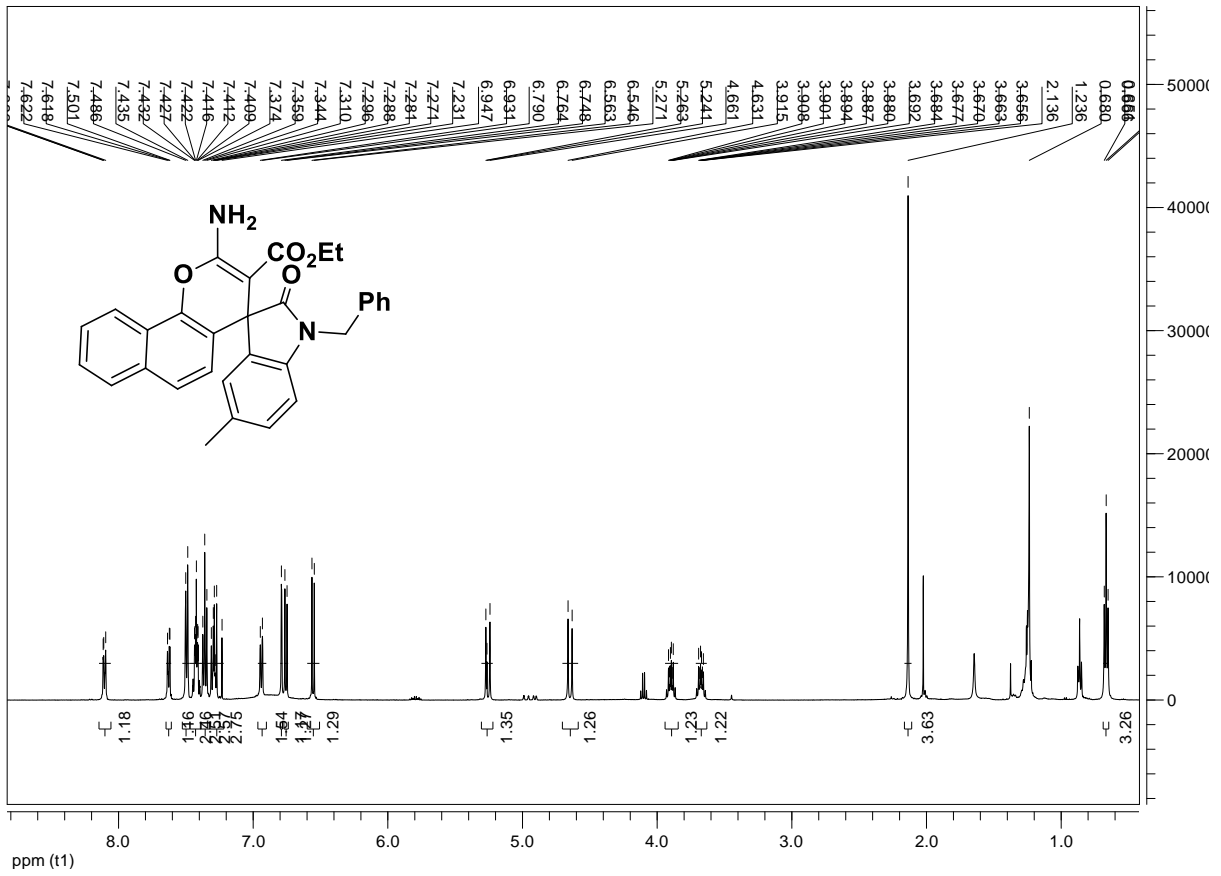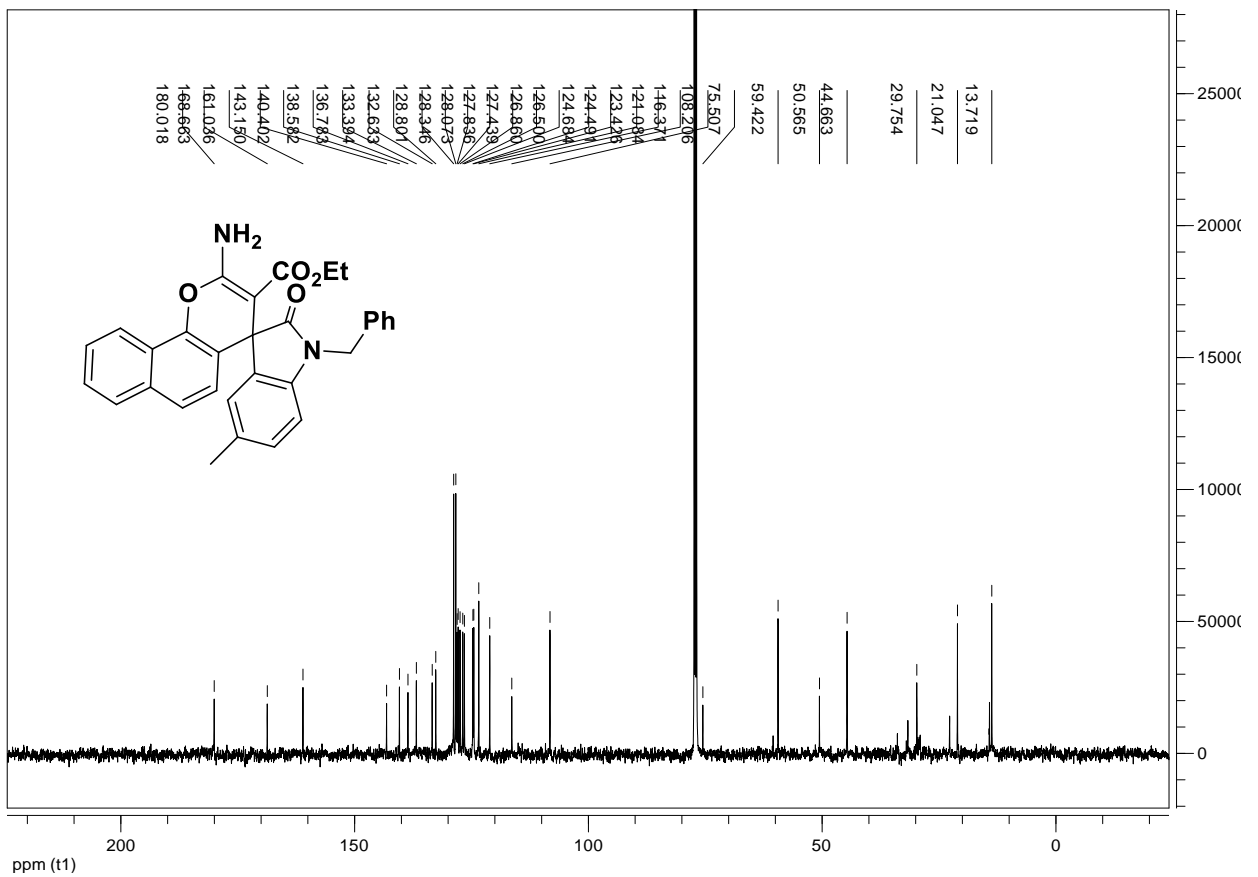

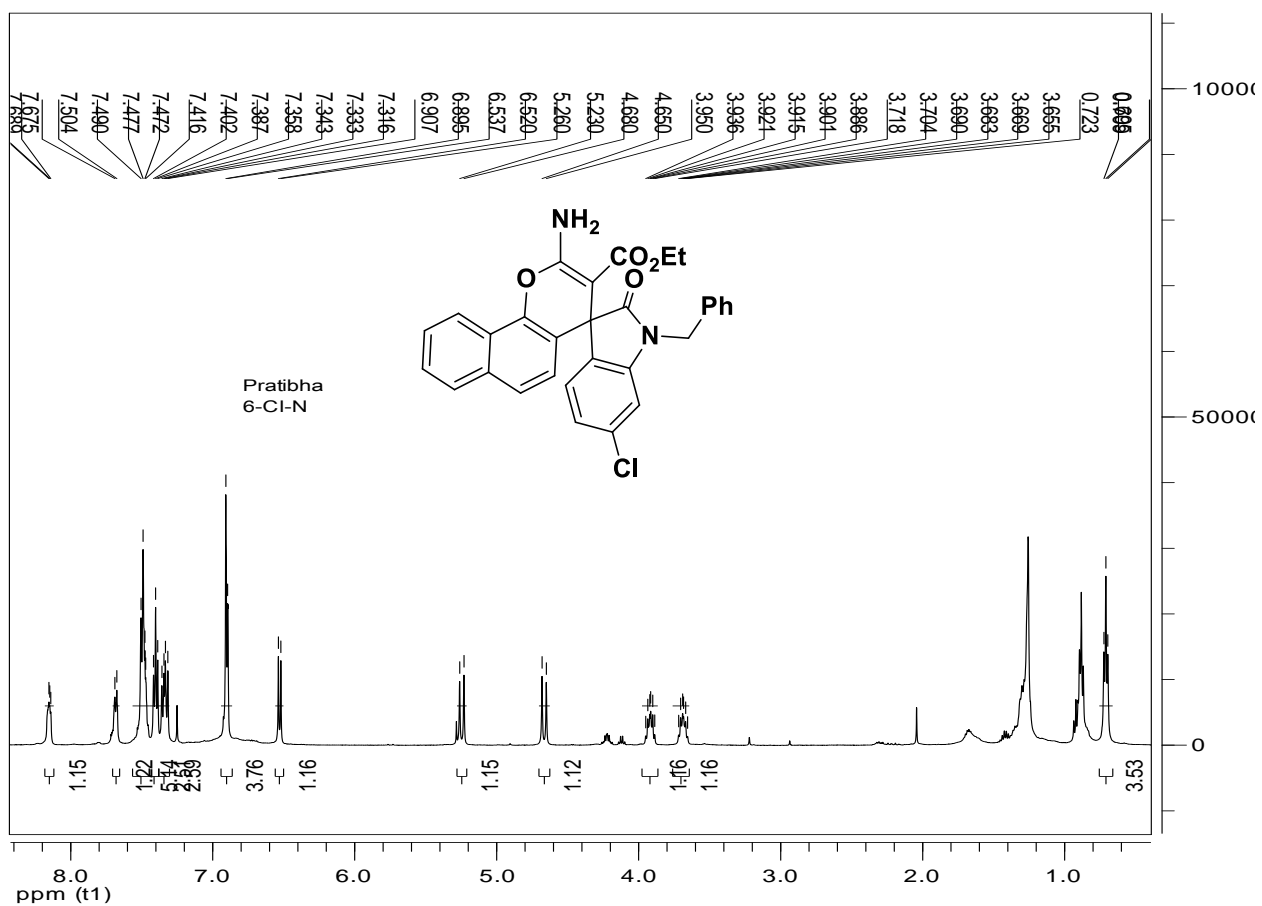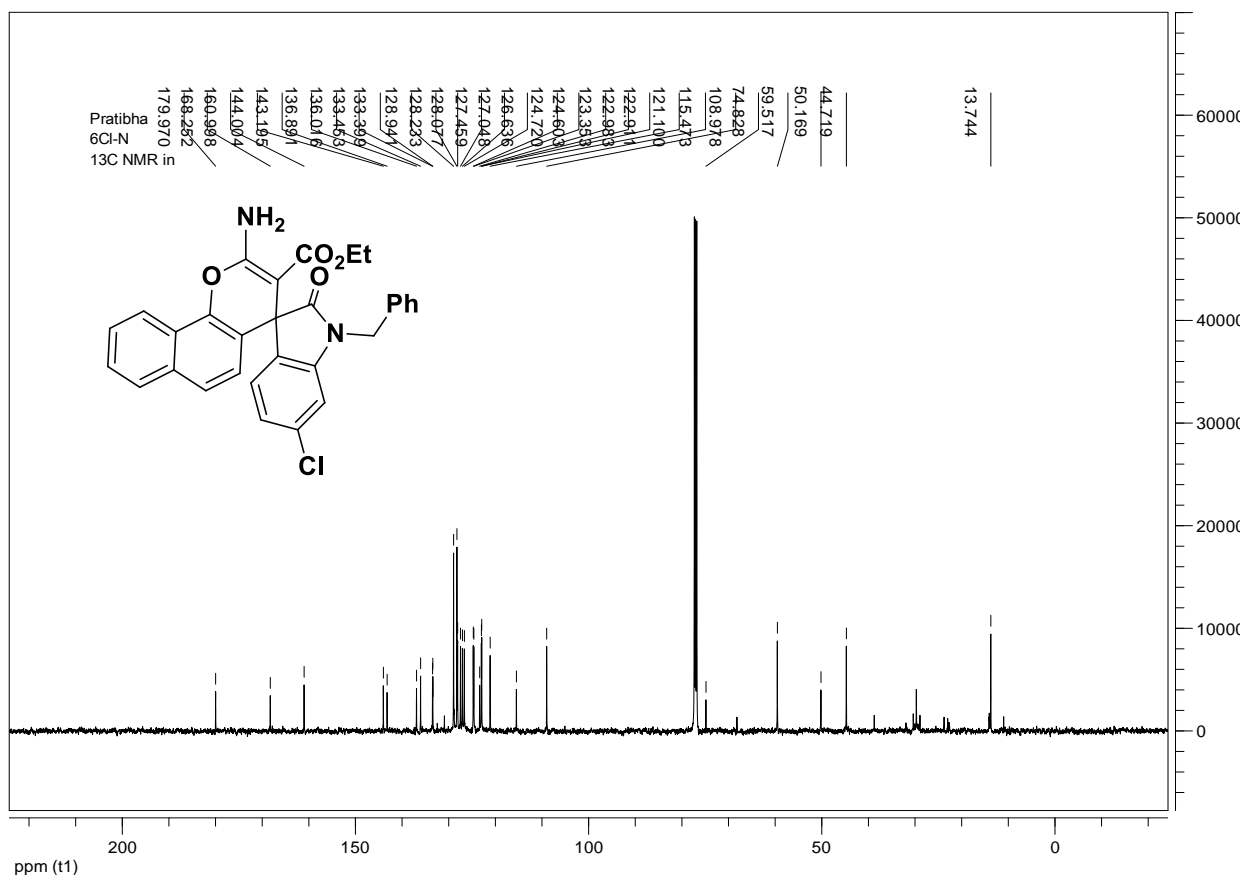

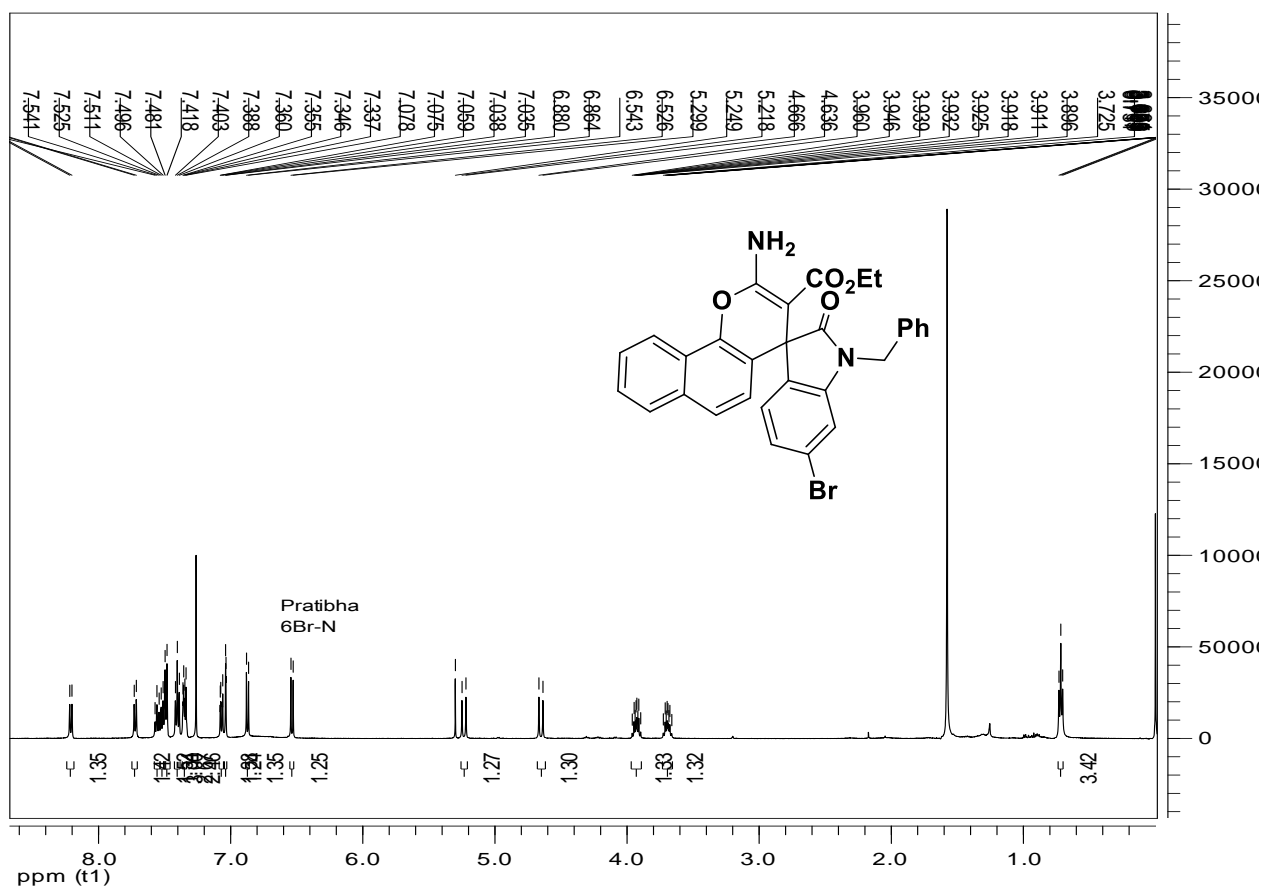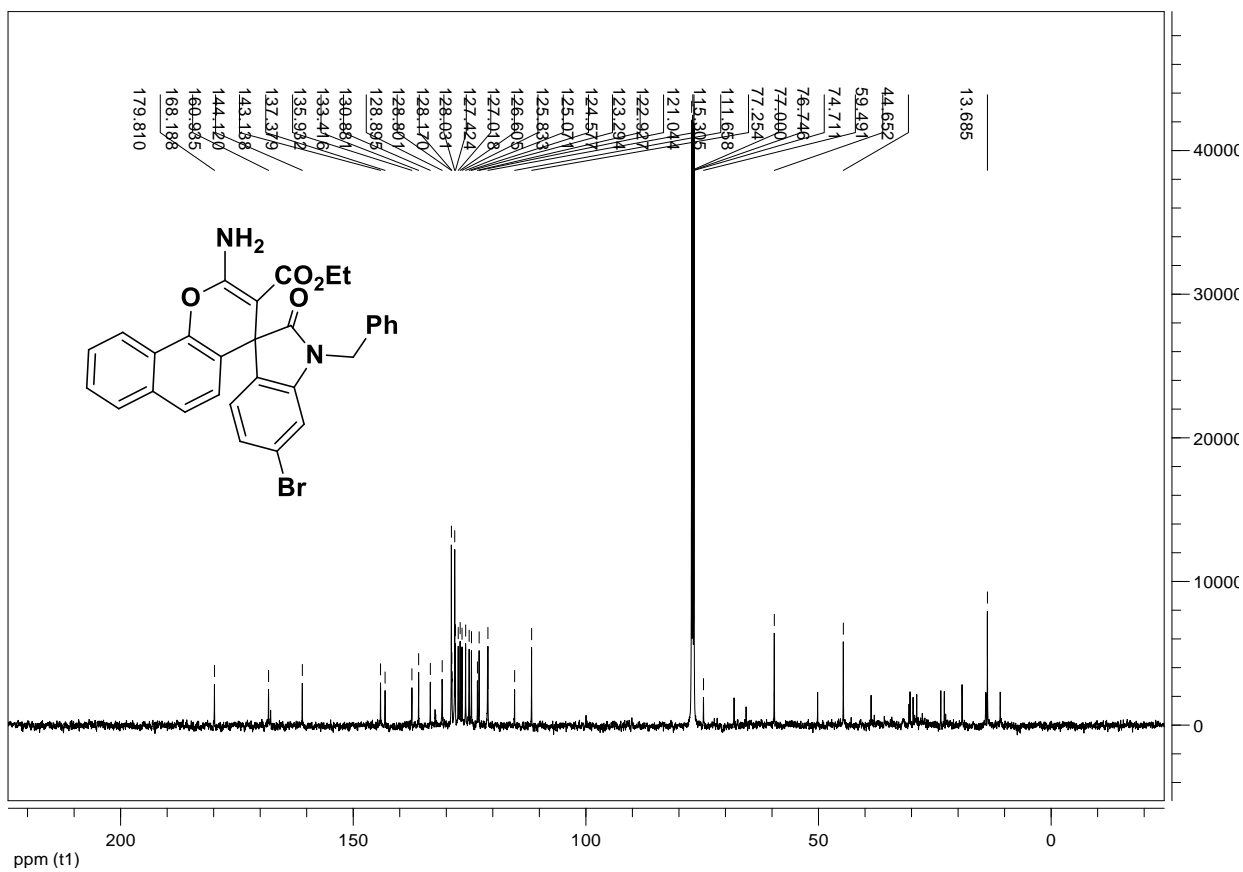

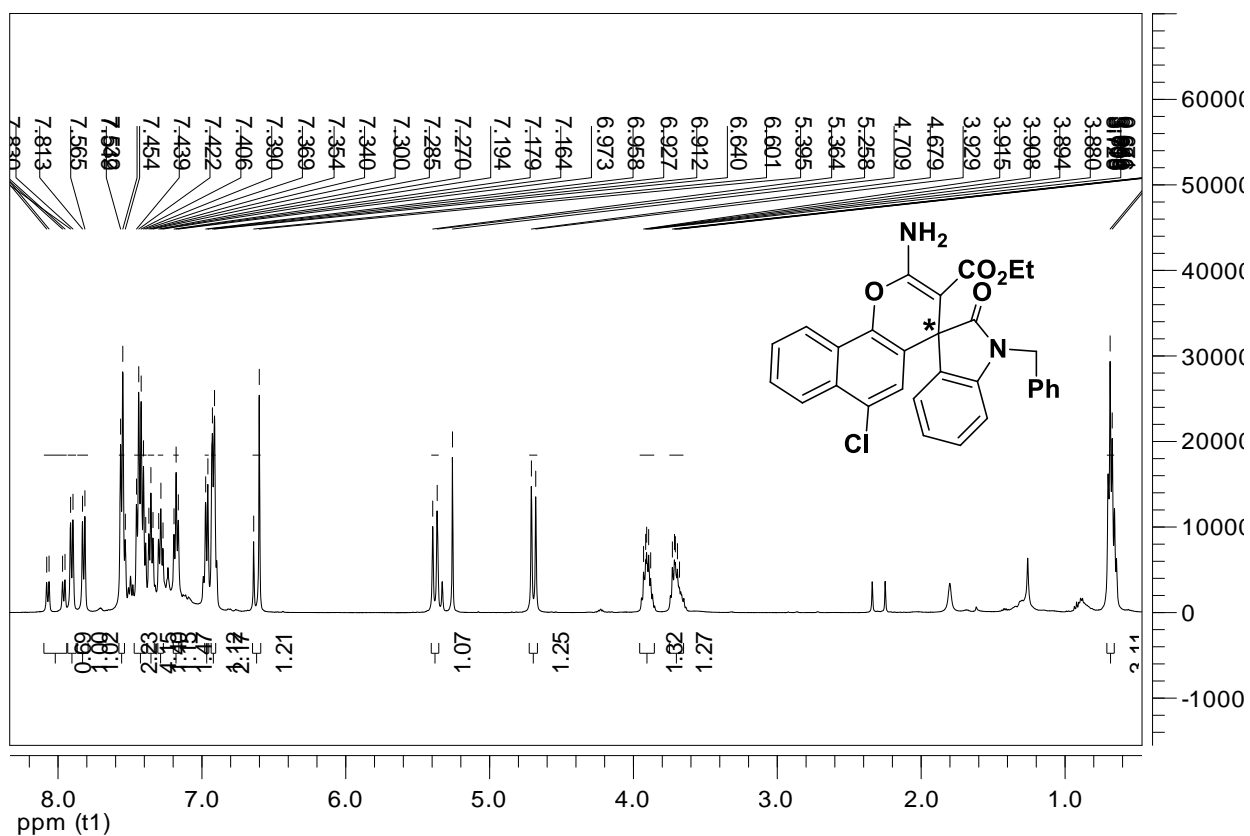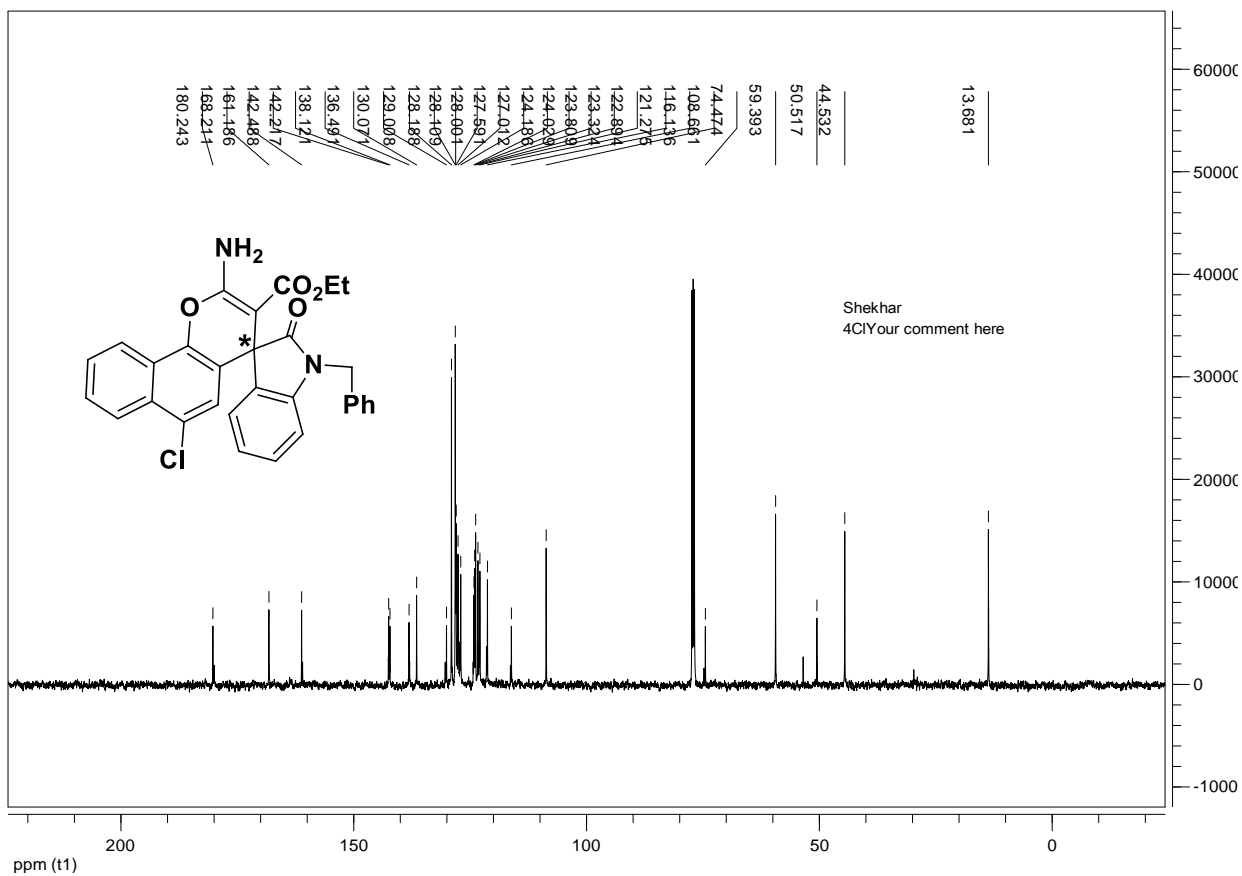

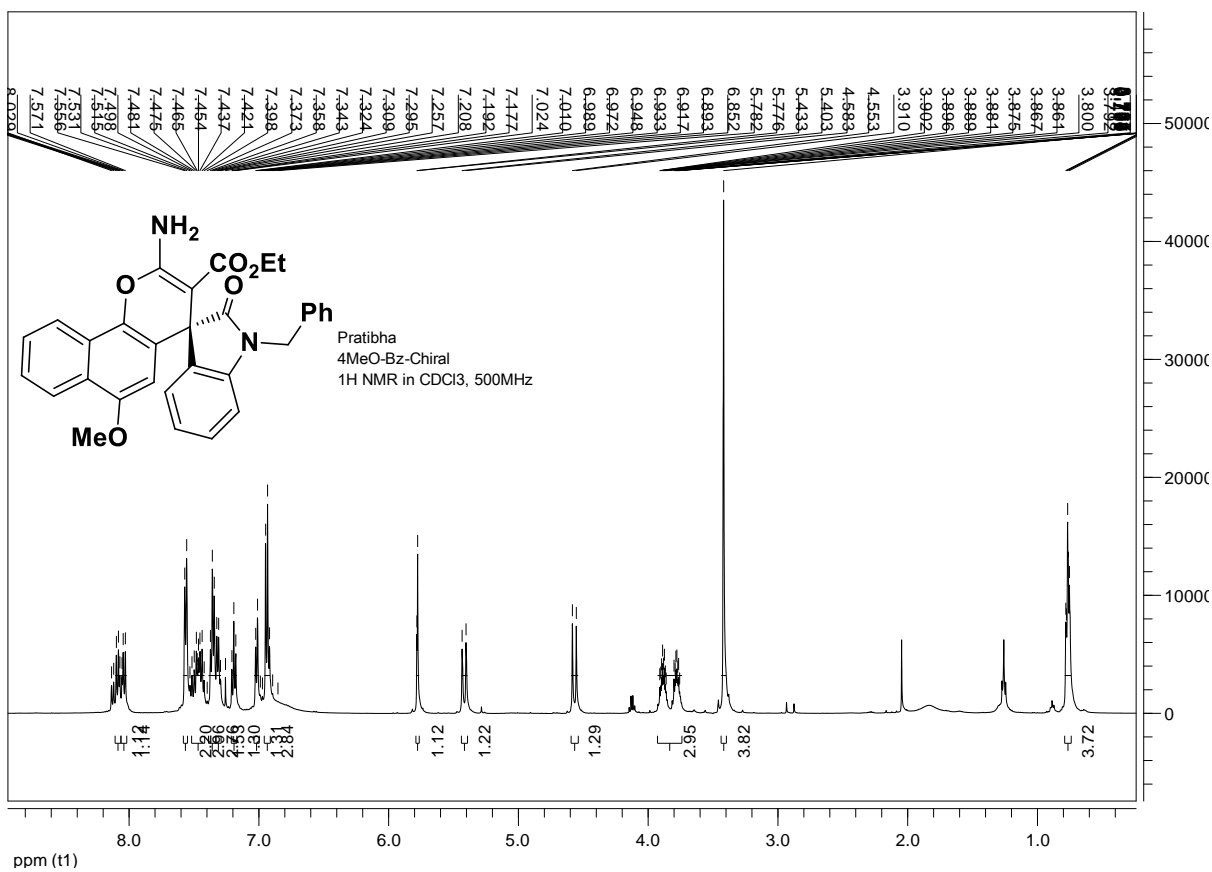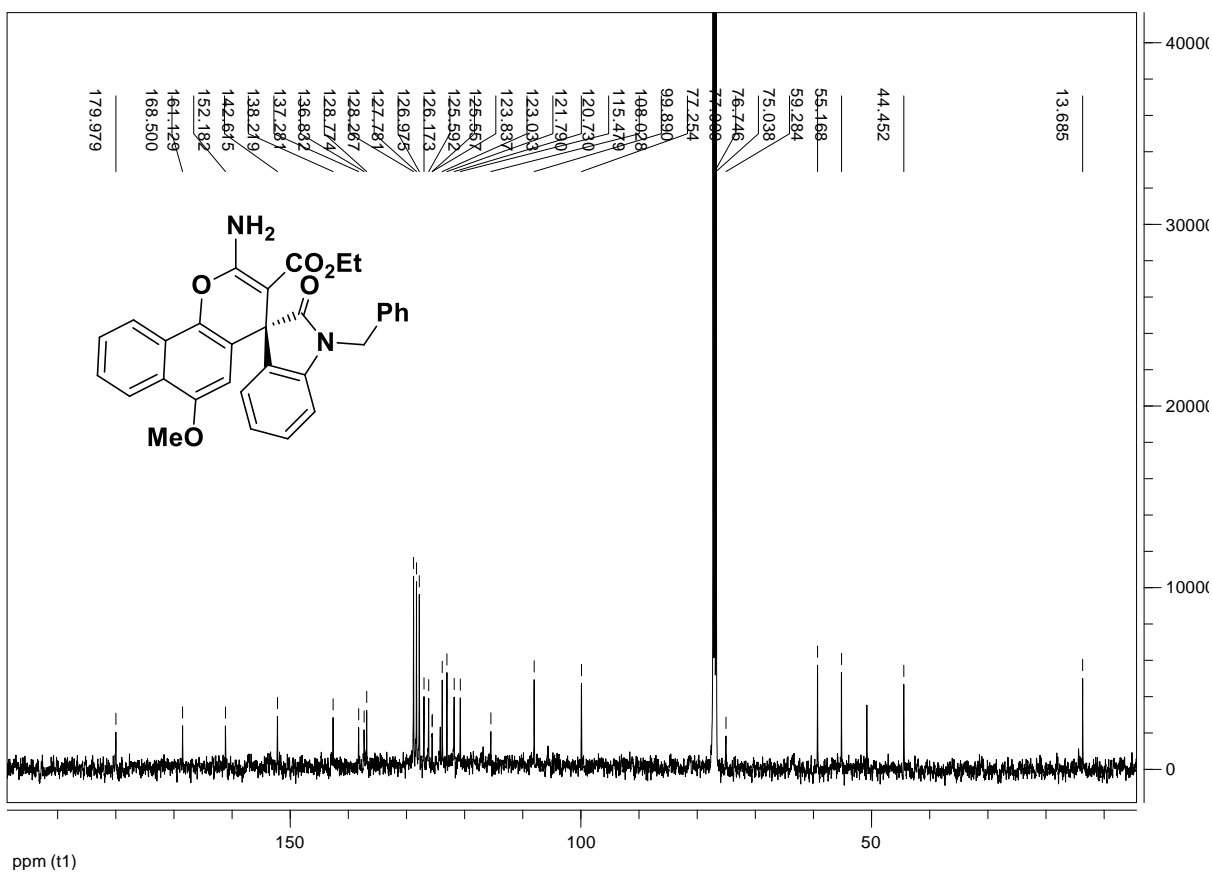

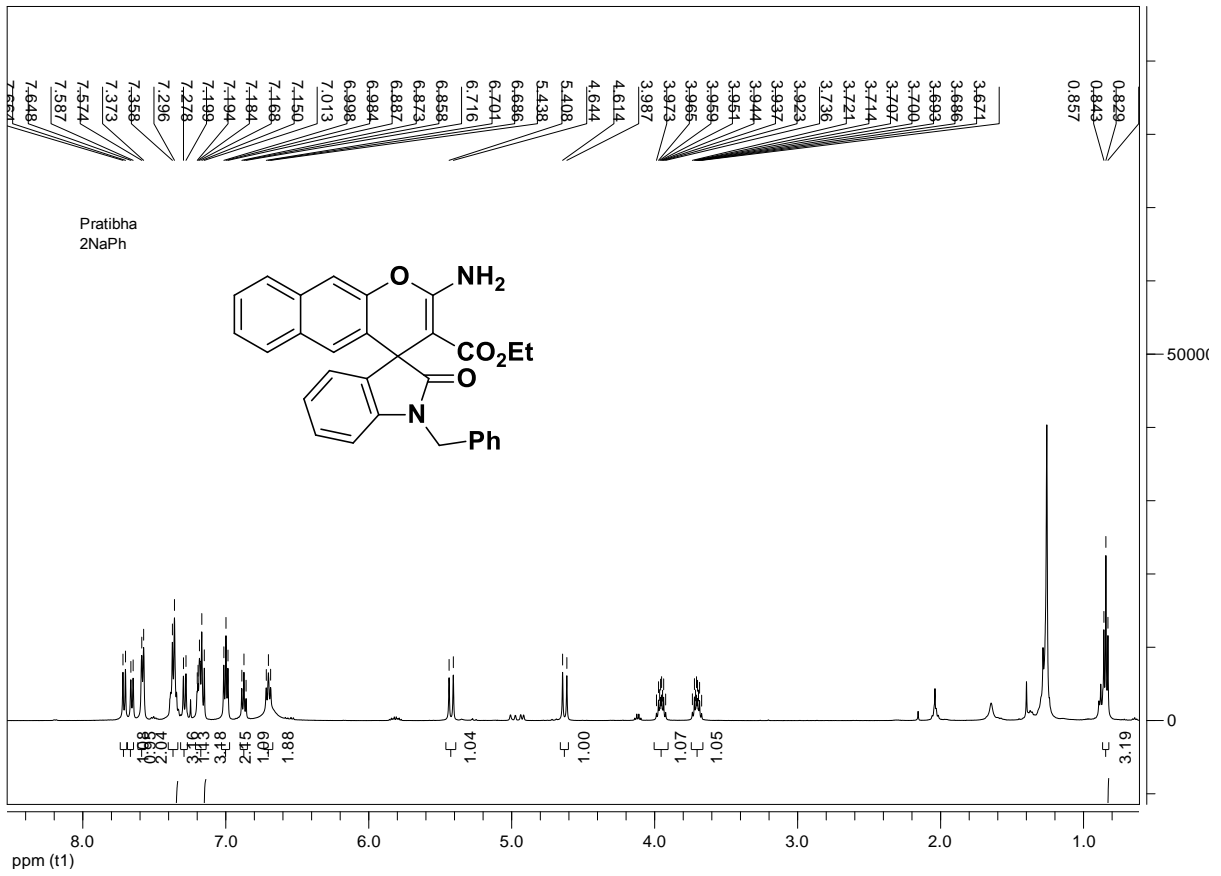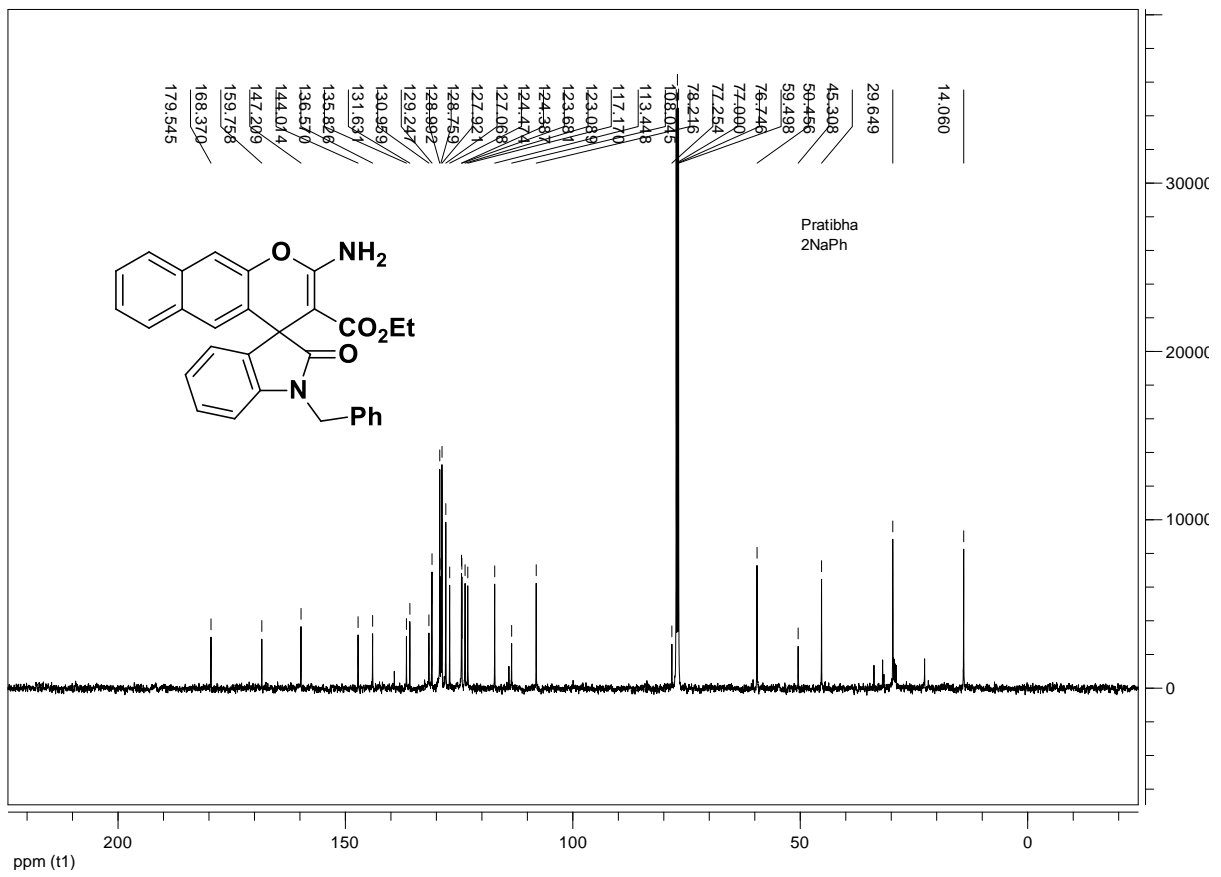



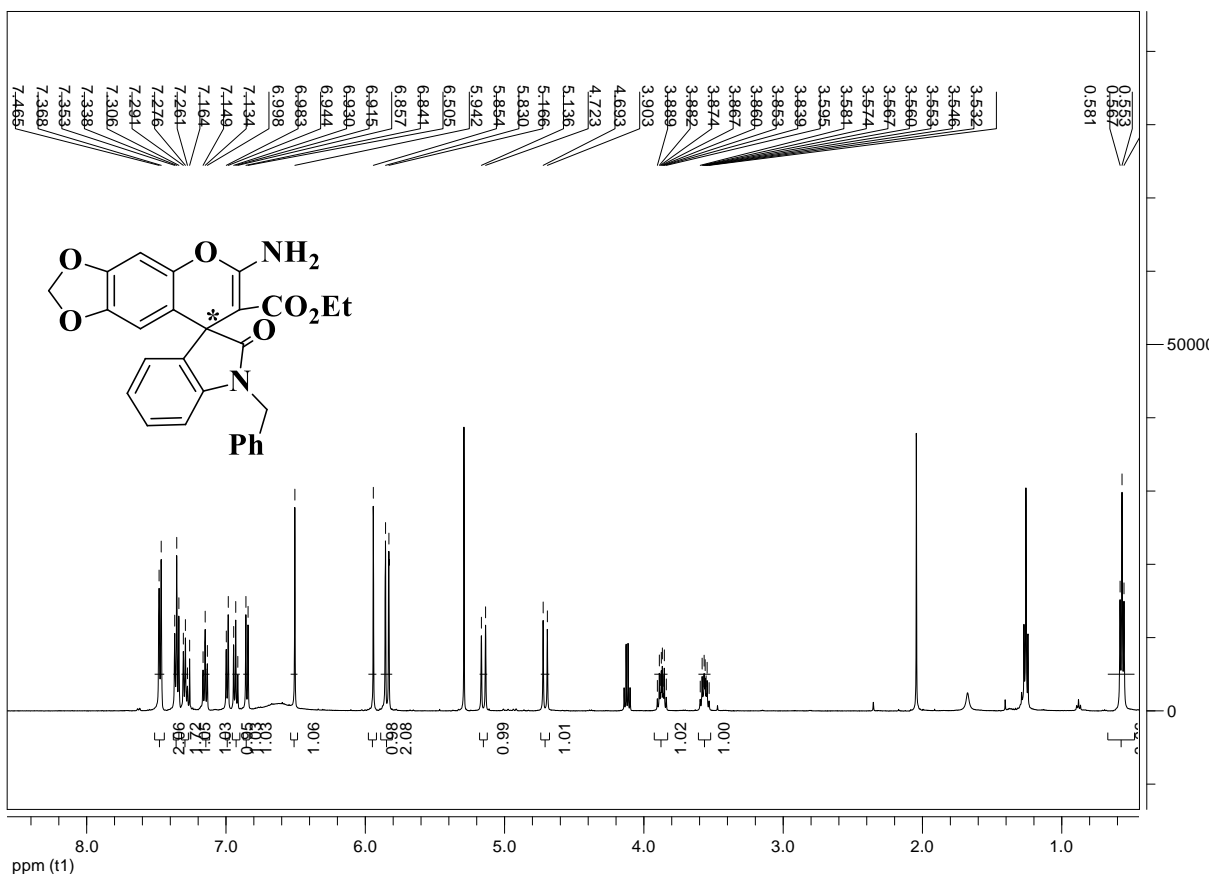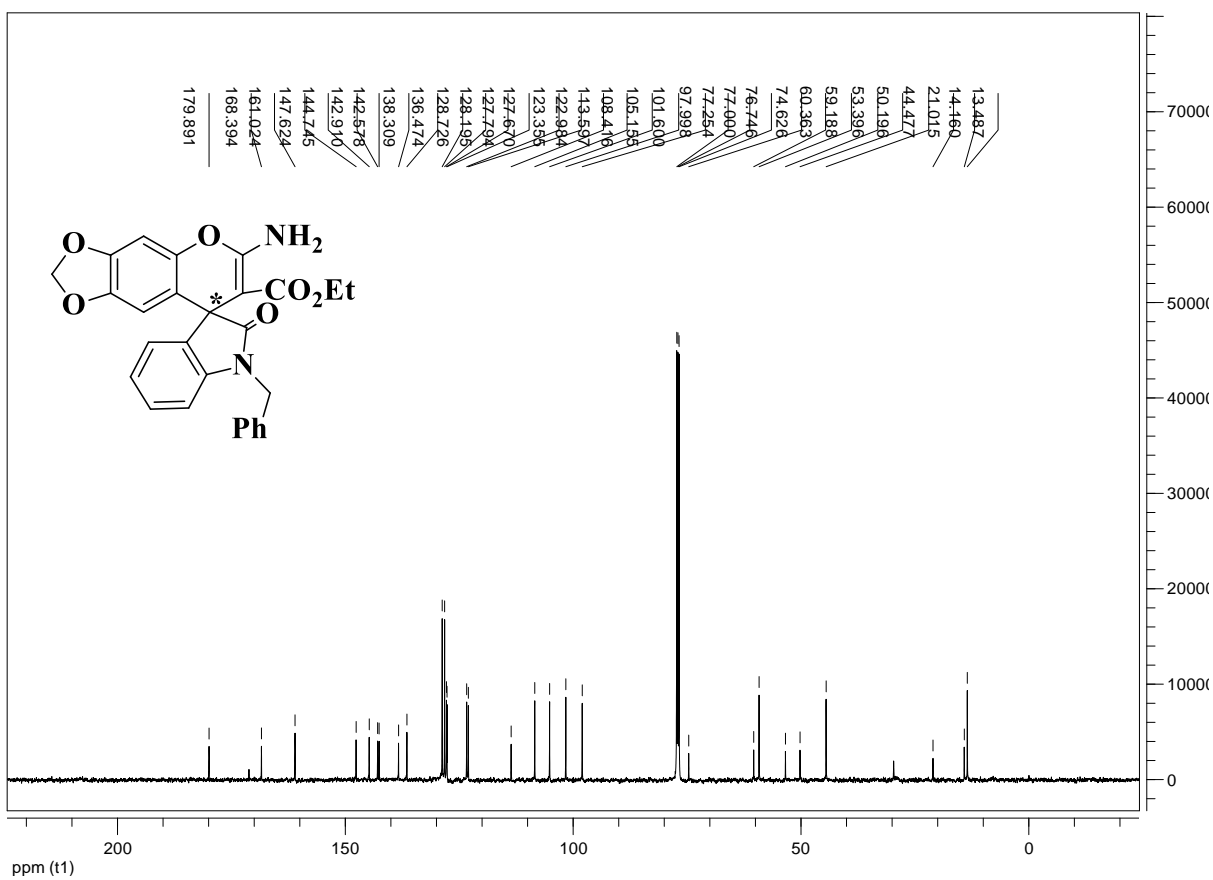

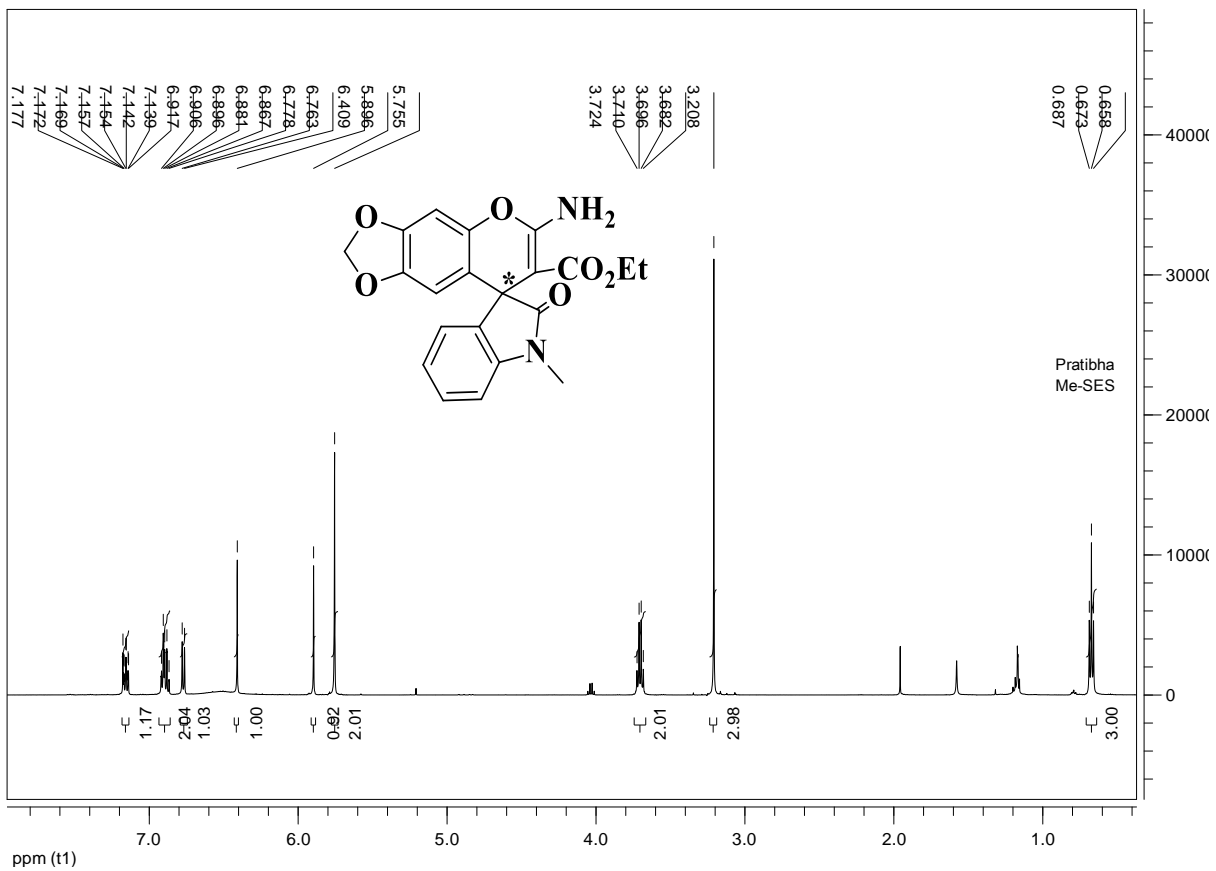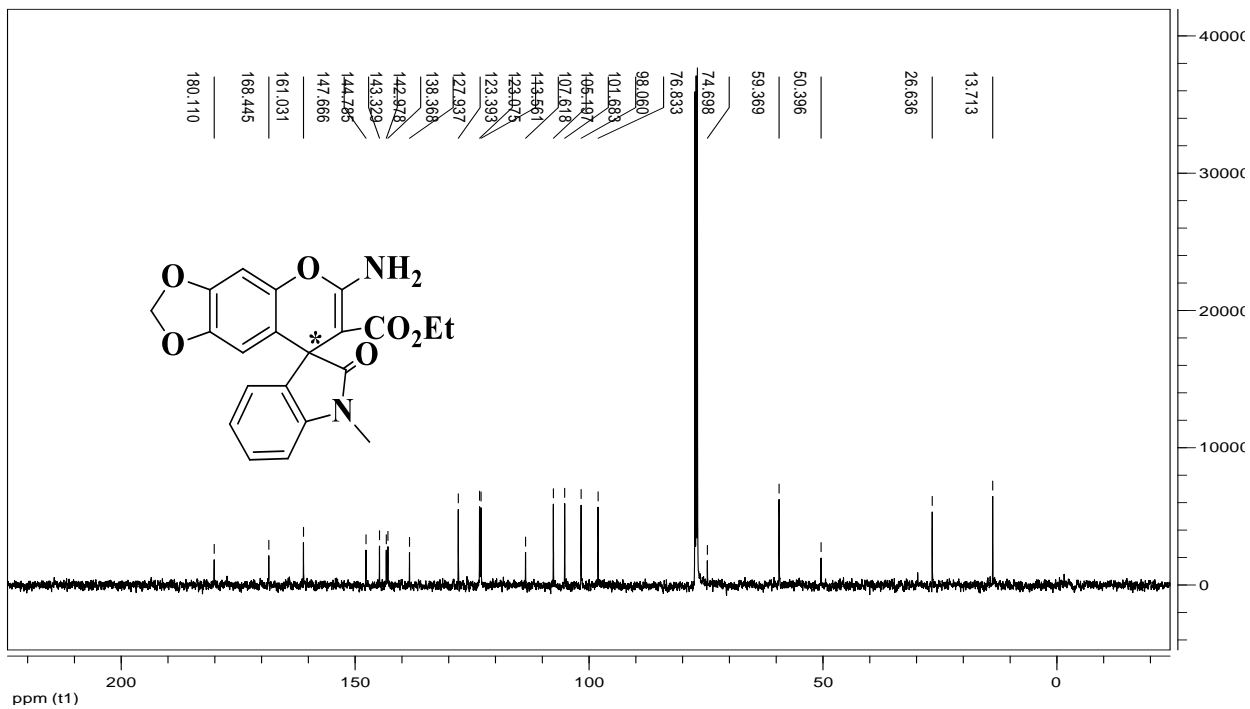

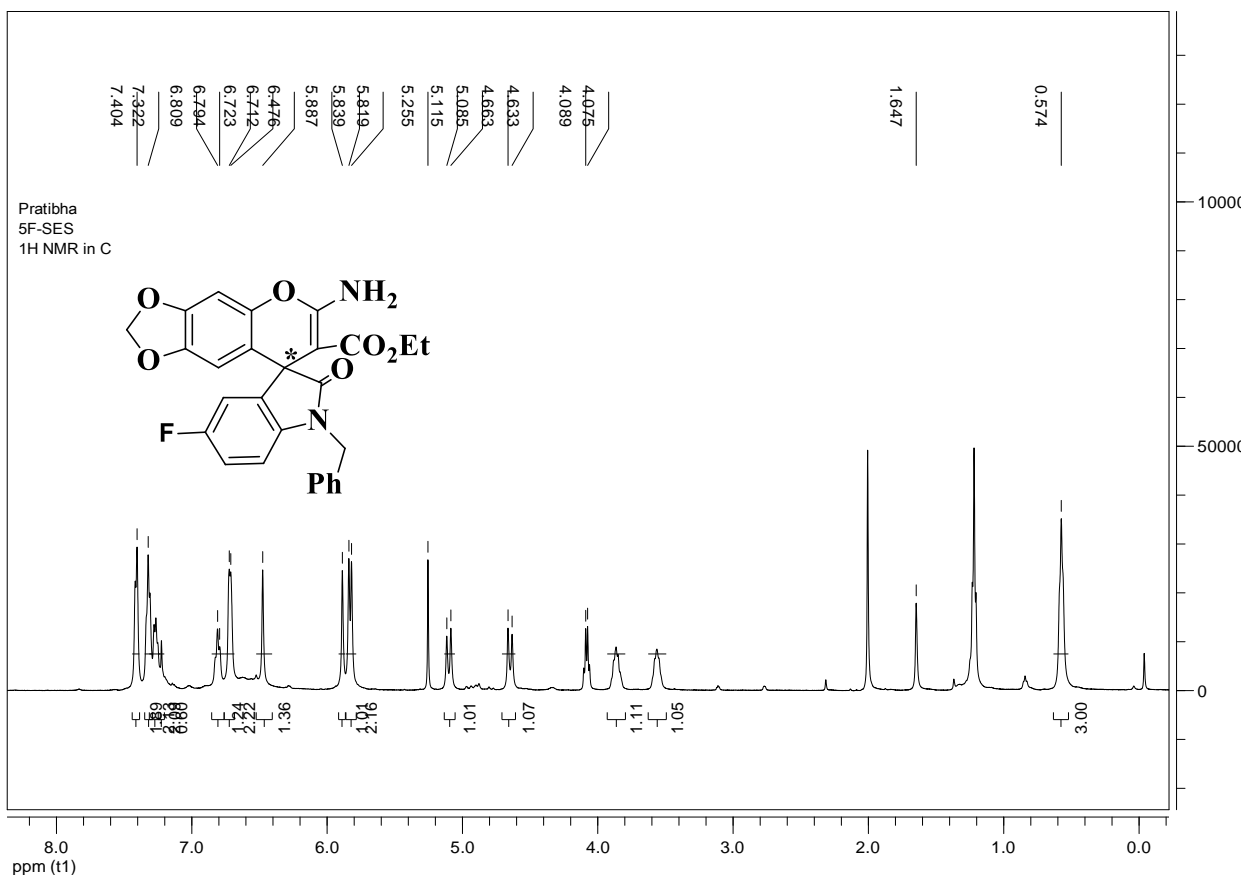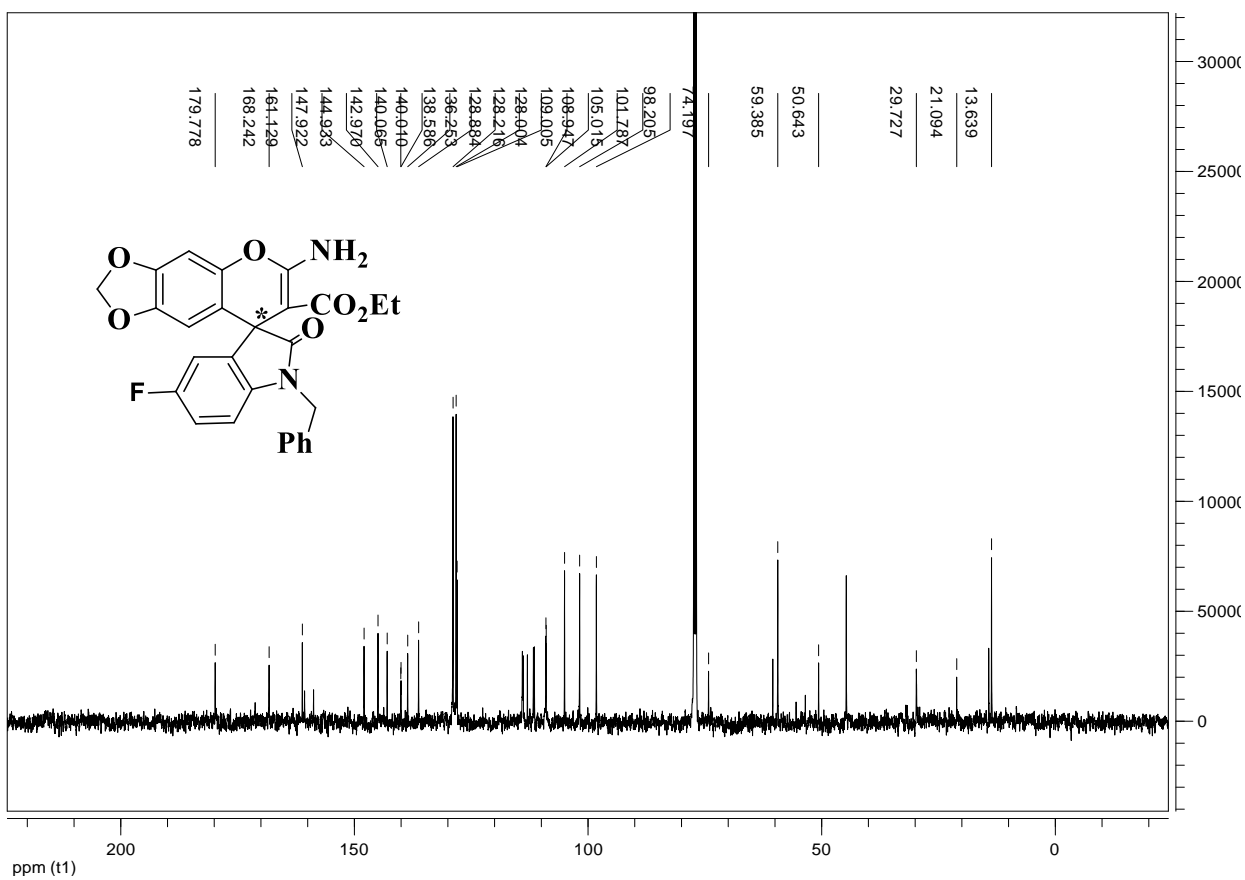

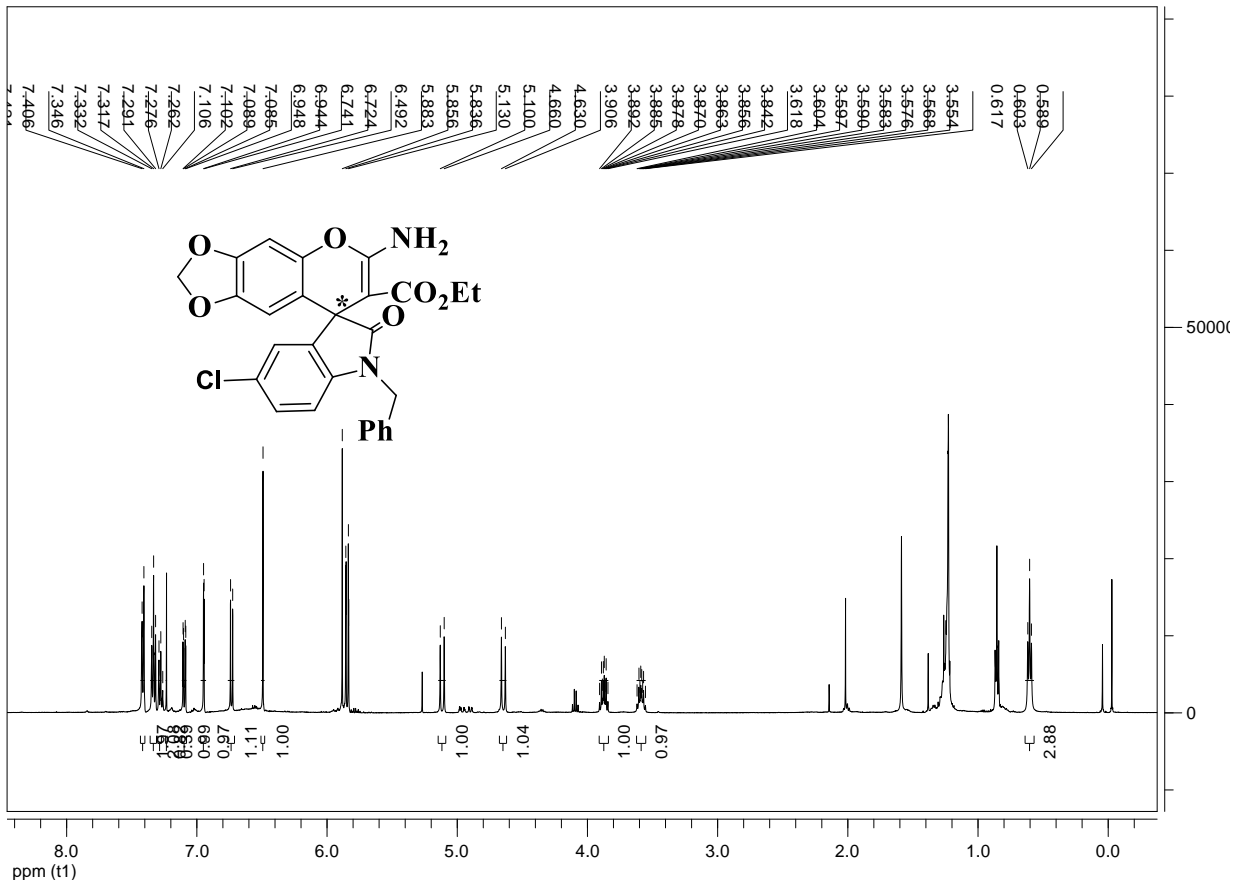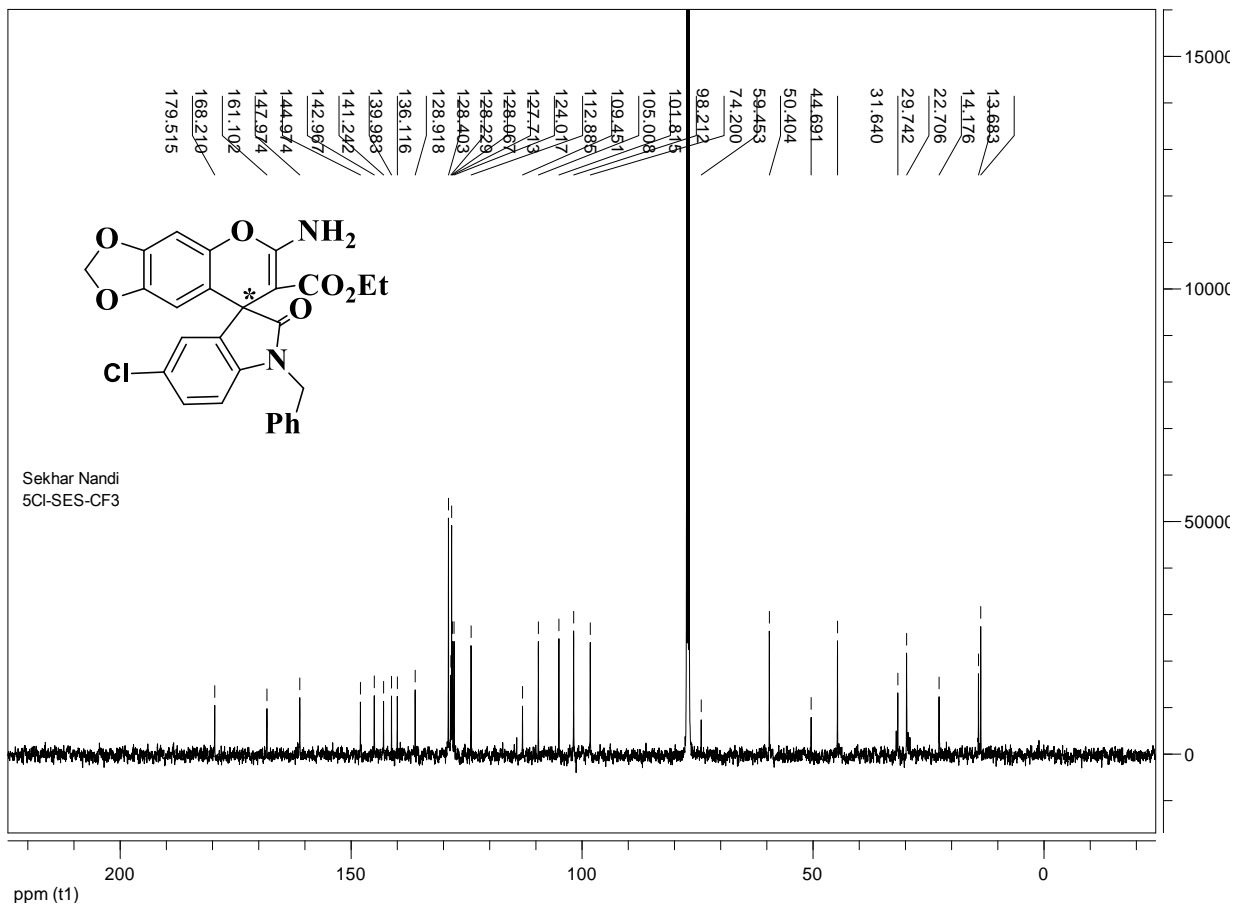



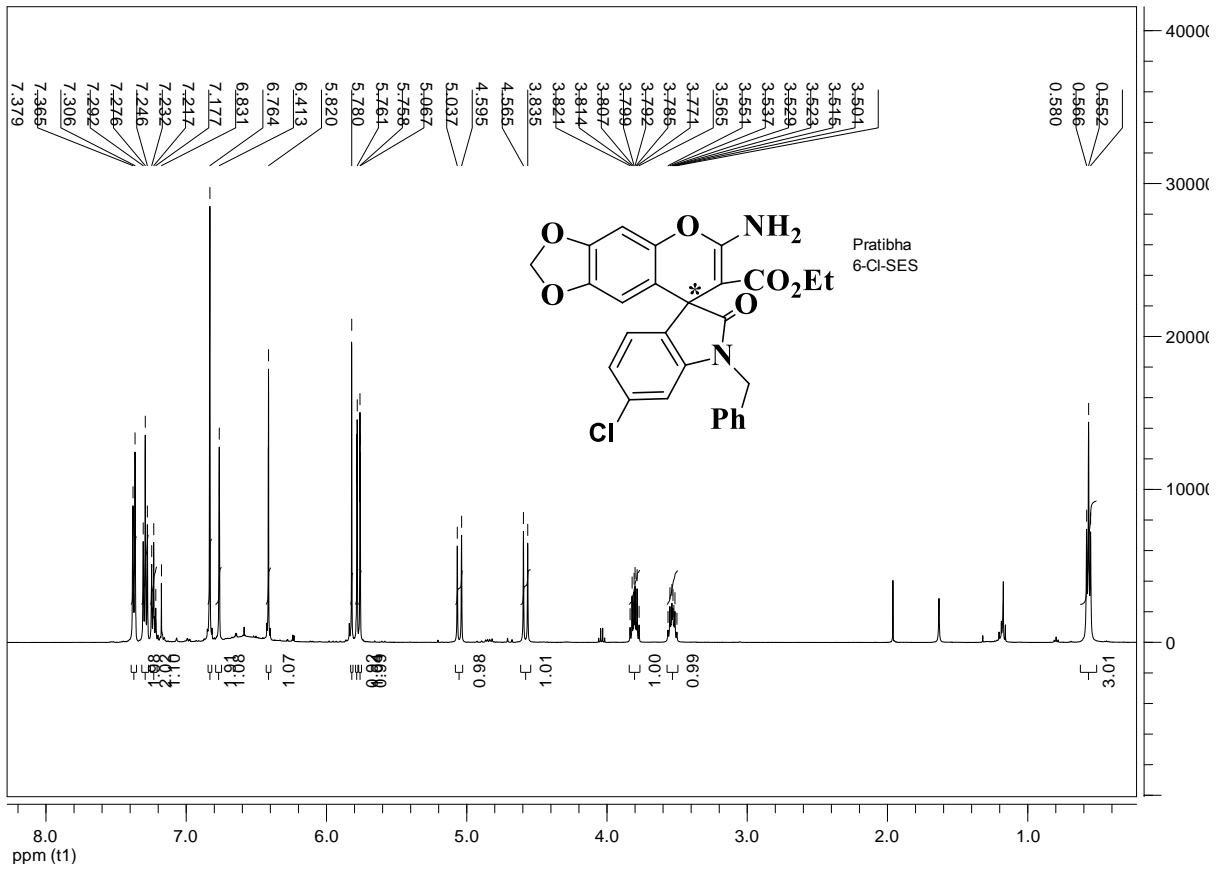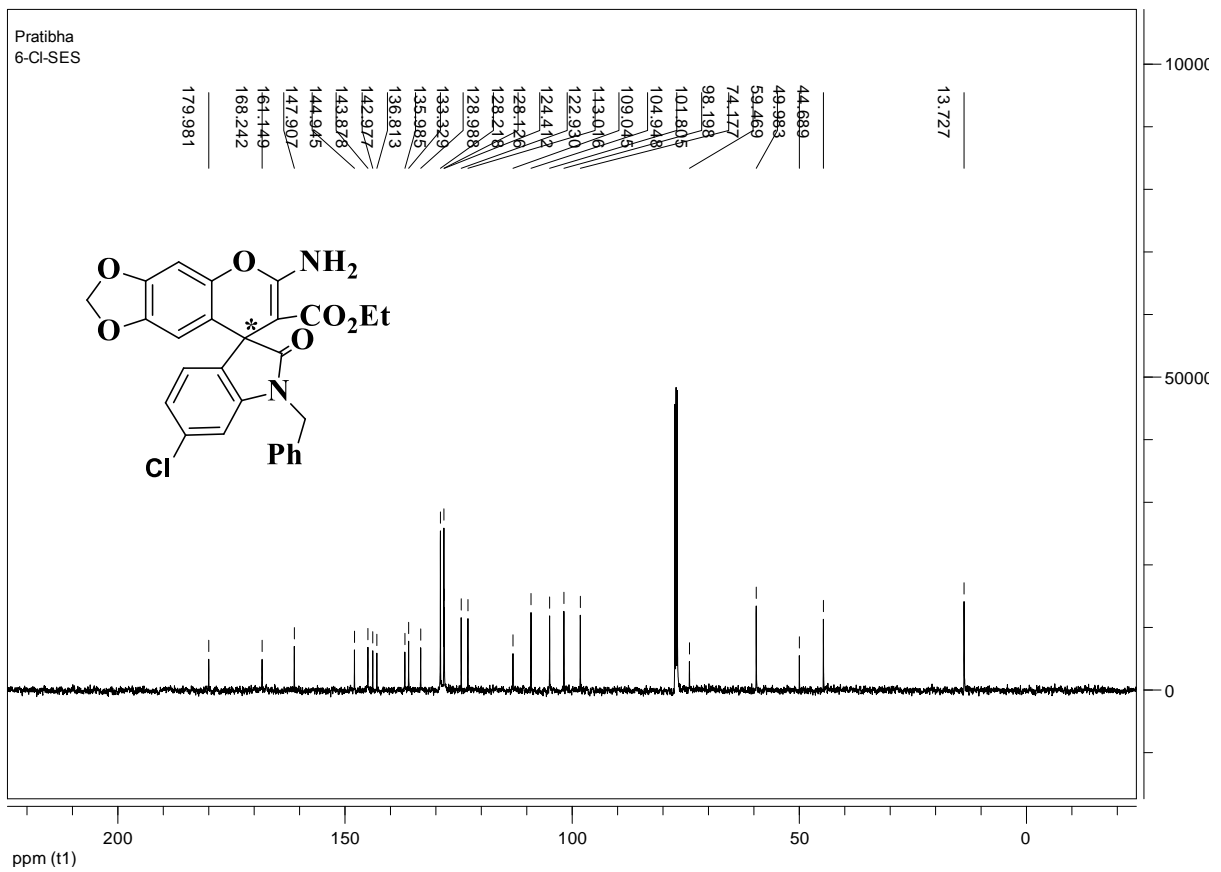

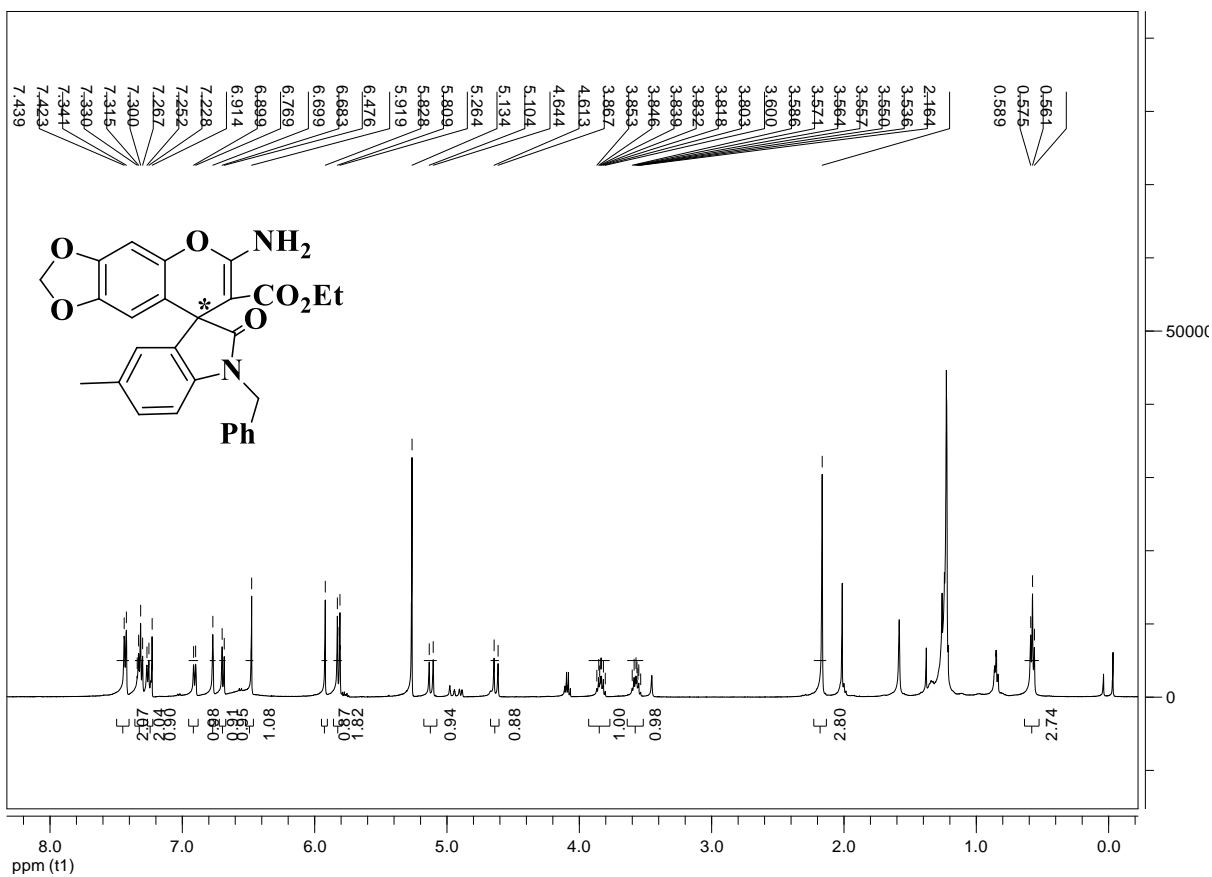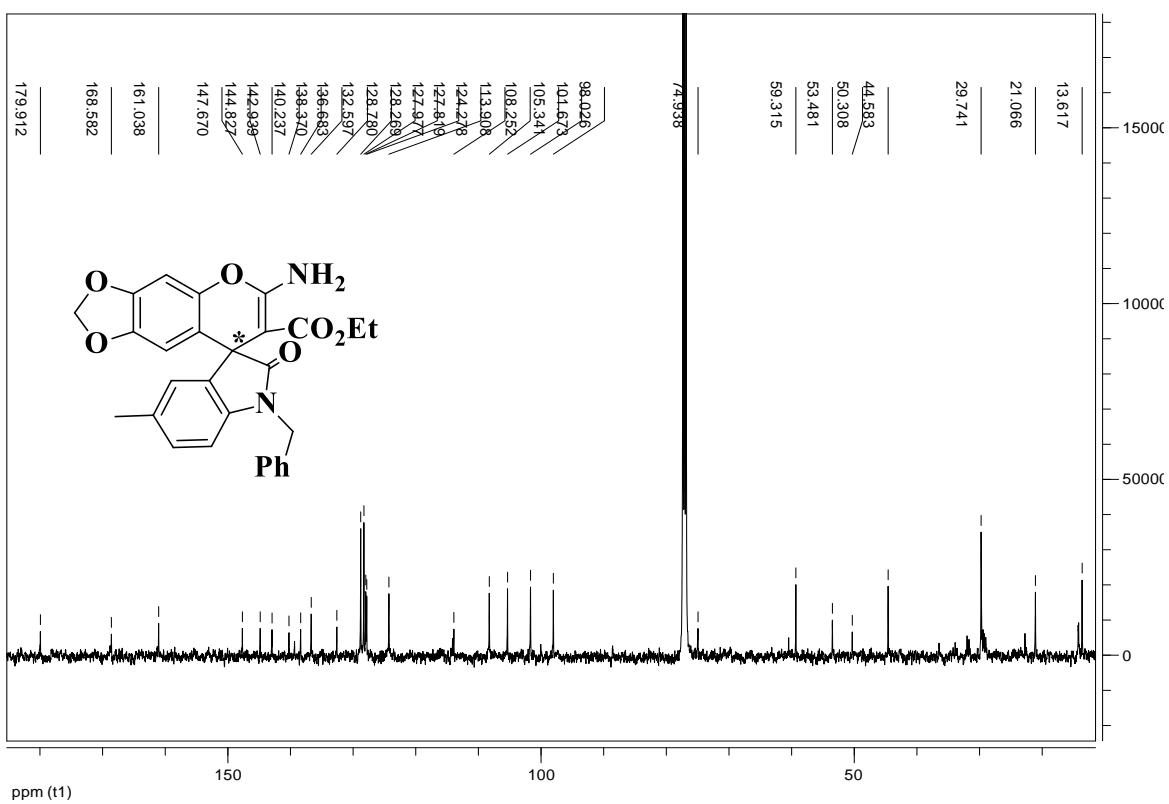

Elemental Composition Report

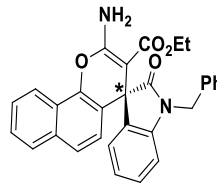

Single Mass Analysis

Tolerance = 50.0 PPM / DBE: min = -1.5, max = 50.0

Element prediction: Off

Number of isotope peaks used for i-FIT = 3

Monoisotopic Mass, Odd and Even Electron Ions

21717 formula(e) evaluated with 41 results within limits (up to 50 closest results for each mass)

Elements Used:

C: 0-31 H: 0-25 Li: 0-1 B: 0-1 N: 0-2 O: 0-4 Na: 0-1 Si: 0-1 K: 0-1 V: 0-2 Ru: 0-1 I: 0-1

Eu: 0-2

N BZ  
N BZ 66 (0.988)

1: TOF MS ES+  
2.00e+000

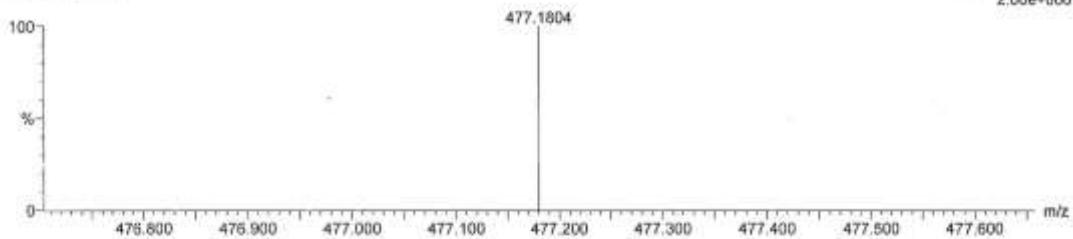

| Mass     | Calc. Mass | mDa   | PPM   | DBE  | i-FIT | Formula                  |
|----------|------------|-------|-------|------|-------|--------------------------|
| 477.1804 | 477.1814   | -1.0  | -2.1  | 19.5 | n/a   | C30 H25 N2 O4            |
|          | 477.1790   | 1.4   | 2.9   | 21.5 | n/a   | C31 H22 Li N2 O3         |
|          | 477.1825   | -2.1  | -4.4  | 17.5 | n/a   | C29 H24 Li B O4 Na       |
|          | 477.1782   | 2.2   | 4.6   | 20.5 | n/a   | C29 H23 Li B N2 O2 Si    |
|          | 477.1766   | 3.8   | 8.0   | 18.5 | n/a   | C29 H23 Li N2 O3 Na      |
|          | 477.1849   | -4.5  | -9.4  | 20.5 | n/a   | C31 H23 Li B O4          |
|          | 477.1758   | 4.6   | 9.6   | 17.5 | n/a   | C27 H24 Li B N2 O2 Na Si |
|          | 477.1750   | 5.4   | 11.3  | 20.5 | n/a   | C30 H23 B N2 O2 Na       |
|          | 477.1744   | 6.0   | 12.6  | 18.5 | n/a   | C31 H25 Li B Na K        |
|          | 477.1736   | 6.8   | 14.3  | 21.0 | n/a   | C31 H24 Li N O2 Si       |
|          | 477.1876   | -7.2  | -15.1 | 20.0 | n/a   | C31 H25 B N O2 Na        |
|          | 477.1728   | 7.6   | 15.9  | 17.5 | n/a   | C28 H24 Li B N2 O2 K     |
|          | 477.1726   | 7.8   | 16.3  | 22.5 | n/a   | C31 H20 Li B N2 O Na     |
|          | 477.1724   | 8.0   | 16.8  | 21.0 | n/a   | C30 H21 Li B N O4        |
|          | 477.1892   | -8.8  | -18.4 | 18.0 | n/a   | C30 H25 Li N O3 Na       |
|          | 477.1712   | 9.2   | 19.3  | 18.0 | n/a   | C29 H25 Li N O2 Na Si    |
|          | 477.1704   | 10.0  | 21.0  | 14.5 | n/a   | C26 H25 Li B N2 O2 Na K  |
|          | 477.1908   | -10.4 | -21.8 | 20.0 | n/a   | C30 H25 Li B N O2 Si     |
|          | 477.1700   | 10.4  | 21.8  | 18.0 | n/a   | C28 H22 Li B N O4 Na     |
|          | 477.1696   | 10.8  | 22.6  | 20.0 | n/a   | C30 H25 B N O Na Si      |
|          | 477.1682   | 12.2  | 25.6  | 18.0 | n/a   | C30 H25 Li N O2 K        |
|          | 477.1672   | 13.2  | 27.7  | 22.0 | n/a   | C31 H22 Li B N Na Si     |
|          | 477.1670   | 13.4  | 28.1  | 20.5 | n/a   | C30 H23 Li B O3 Si       |
|          | 477.1938   | -13.4 | -28.1 | 17.5 | n/a   | C28 H24 Li B N2 O3 Na    |
|          | 477.1666   | 13.8  | 28.9  | 20.0 | n/a   | C31 H25 B N O K          |
|          | 477.1654   | 15.0  | 31.4  | 18.5 | n/a   | C30 H23 Li O4 Na         |
|          | 477.1646   | 15.8  | 33.1  | 17.5 | n/a   | C28 H24 Li B O3 Na Si    |
|          | 477.1962   | -15.8 | -33.1 | 20.5 | n/a   | C30 H23 Li B N2 O3       |
|          | 477.1638   | 16.6  | 34.8  | 20.5 | n/a   | C31 H23 B O3 Na          |
|          | 477.1634   | 17.0  | 35.6  | 19.5 | n/a   | C29 H25 N2 O3 Si         |
|          | 477.1618   | 18.6  | 39.0  | 19.0 | n/a   | C30 H23 Li B N Na K      |
|          | 477.1616   | 18.8  | 39.4  | 17.5 | n/a   | C29 H24 Li B O3 K        |
|          | 477.1611   | 19.3  | 40.4  | 21.5 | n/a   | C30 H22 Li N2 O2 Si      |
|          | 477.1598   | 20.6  | 43.2  | 21.5 | n/a   | C29 H19 Li B N2 O4       |
|          | 477.1594   | 21.0  | 44.0  | 23.5 | n/a   | C31 H22 B N2 O Si        |
|          | 477.1592   | 21.2  | 44.4  | 14.5 | n/a   | C27 H25 Li B O3 Na K     |
|          | 477.1587   | 21.7  | 45.5  | 18.5 | n/a   | C28 H23 Li N2 O2 Na Si   |
|          | 477.1579   | 22.5  | 47.2  | 21.5 | n/a   | C31 H22 N2 O2 Na         |
|          | 477.1574   | 23.0  | 48.2  | 18.5 | n/a   | C27 H20 Li B N2 O4 Na    |
|          | 477.1570   | 23.4  | 49.0  | 20.5 | n/a   | C29 H23 B N2 O Na Si     |



Elemental Composition Report

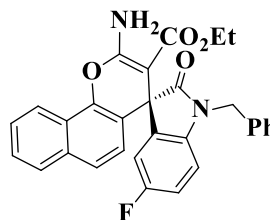

Single Mass Analysis

Tolerance = 50.0 PPM / DBE: min = -1.5, max = 50.0

Element prediction: Off

Number of isotope peaks used for i-FIT = 3

Monoisotopic Mass, Even Electron Ions

43217 formula(e) evaluated with 50 results within limits (up to 50 closest results for each mass)

Elements Used:

C: 0-31 H: 0-24 Li: 0-1 B: 0-1 N: 0-2 O: 0-4 F: 0-1 Na: 0-1 Si: 0-1 K: 0-1 V: 0-2 Ru: 0-1

I: 0-1 Eu: 0-2

5F N

5F N 51 (0.749)

1: TOF MS ES+  
2.00e+000

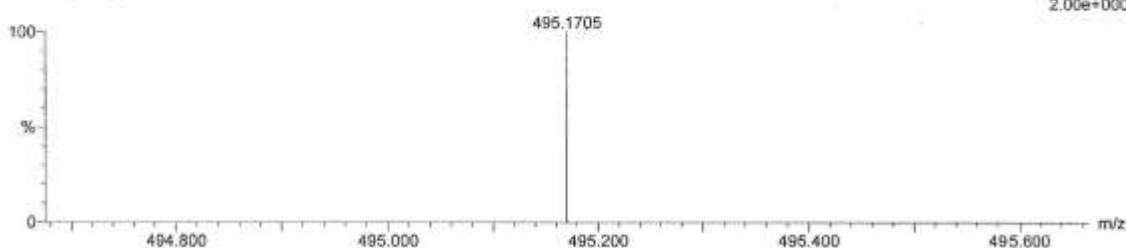

| Mass     | Calc. Mass | mDa   | PPM   | DBE  | i-FIT | Formula                    |
|----------|------------|-------|-------|------|-------|----------------------------|
| 495.1705 | 495.1700   | 0.5   | 1.0   | 22.5 | n/a   | C31 H24 B N2 O2 Si         |
|          | 495.1696   | 0.9   | 1.8   | 21.5 | n/a   | C31 H21 Li N2 O3 F         |
|          | 495.1716   | -1.1  | -2.2  | 20.5 | n/a   | C30 H24 Li N2 O3 Si        |
|          | 495.1720   | -1.5  | -3.0  | 19.5 | n/a   | C30 H24 N2 O4 F            |
|          | 495.1688   | 1.7   | 3.4   | 20.5 | n/a   | C29 H22 Li B N2 O2 F Si    |
|          | 495.1685   | 2.0   | 4.0   | 20.5 | n/a   | C31 H24 N2 O3 Na           |
|          | 495.1731   | -2.6  | -5.3  | 17.5 | n/a   | C29 H23 Li B O4 F Na       |
|          | 495.1672   | 3.3   | 6.7   | 18.5 | n/a   | C29 H22 Li N2 O3 F Na      |
|          | 495.1664   | 4.1   | 8.3   | 17.5 | n/a   | C27 H23 Li B N2 O2 F Na Si |
|          | 495.1656   | 4.9   | 9.9   | 20.5 | n/a   | C30 H22 B N2 O2 F Na       |
|          | 495.1755   | -5.0  | -10.1 | 20.5 | n/a   | C31 H22 Li B O4 F          |
|          | 495.1652   | 5.3   | 10.7  | 21.5 | n/a   | C30 H22 Li B N2 O Na Si    |
|          | 495.1650   | 5.5   | 11.1  | 18.5 | n/a   | C31 H24 Li B F Na K        |
|          | 495.1634   | 7.1   | 14.3  | 17.5 | n/a   | C28 H23 Li B N2 O2 F K     |
|          | 495.1632   | 7.3   | 14.7  | 22.5 | n/a   | C31 H19 Li B N2 O F Na     |
|          | 495.1622   | 8.3   | 16.8  | 21.5 | n/a   | C31 H22 Li B N2 O K        |
|          | 495.1610   | 9.5   | 19.2  | 14.5 | n/a   | C26 H24 Li B N2 O2 F Na K  |
|          | 495.1604   | 10.1  | 20.4  | 20.5 | n/a   | C31 H24 Li O4 Si           |
|          | 495.1598   | 10.7  | 21.6  | 18.5 | n/a   | C29 H23 Li B N2 O Na K     |
|          | 495.1832   | -12.7 | -25.6 | 21.5 | n/a   | C31 H22 Li B N2 O2 Na      |
|          | 495.1575   | 13.0  | 26.3  | 20.5 | n/a   | C30 H22 Li B O3 F Si       |
|          | 495.1844   | -13.9 | -28.1 | 17.5 | n/a   | C28 H23 Li B N2 O3 F Na    |
|          | 495.1560   | 14.5  | 29.3  | 18.5 | n/a   | C30 H22 Li O4 F Na         |
|          | 495.1551   | 15.4  | 31.1  | 17.5 | n/a   | C28 H23 Li B O3 F Na Si    |
|          | 495.1551   | 15.4  | 31.1  | 20.5 | n/a   | C31 H24 Li B N O V         |
|          | 495.1544   | 16.1  | 32.5  | 20.5 | n/a   | C31 H22 B O3 F Na          |
|          | 495.1868   | -16.3 | -32.9 | 20.5 | n/a   | C30 H22 Li B N2 O3 F       |
|          | 495.1540   | 16.5  | 33.3  | 21.5 | n/a   | C31 H22 Li B O2 Na Si      |
|          | 495.1540   | 16.5  | 33.3  | 19.5 | n/a   | C29 H24 N2 O3 F Si         |
|          | 495.1524   | 18.1  | 36.6  | 20.5 | n/a   | C28 H21 Li B N2 O4 Si      |
|          | 495.1521   | 18.4  | 37.2  | 17.5 | n/a   | C29 H23 Li B O3 F K        |
|          | 495.1516   | 18.9  | 38.2  | 23.5 | n/a   | C31 H20 B N2 O4            |
|          | 495.1516   | 18.9  | 38.2  | 21.5 | n/a   | C30 H21 Li N2 O2 F Si      |
|          | 495.1896   | -19.1 | -38.6 | 20.5 | n/a   | C31 H24 Li N2 O4           |
|          | 495.1505   | 20.0  | 40.4  | 20.5 | n/a   | C30 H24 N2 O2 Na Si        |
|          | 495.1504   | 20.1  | 40.6  | 21.5 | n/a   | C29 H18 Li B N2 O4 F       |
|          | 495.1500   | 20.5  | 41.4  | 23.5 | n/a   | C31 H21 B N2 O F Si        |
|          | 495.1500   | 20.5  | 41.4  | 17.5 | n/a   | C26 H22 Li B N2 O4 Na Si   |
|          | 495.1497   | 20.8  | 42.0  | 14.5 | n/a   | C27 H24 Li B O3 F Na K     |
|          | 495.1492   | 21.3  | 43.0  | 20.5 | n/a   | C29 H21 B N2 O4 Na         |

Elemental Composition Report

Single Mass Analysis

Tolerance = 50.0 PPM / DBE: min = -1.5, max = 50.0

Element prediction: Off

Number of isotope peaks used for i-FIT = 3

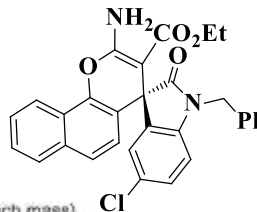

Monoisotopic Mass, Odd and Even Electron Ions

35 formula(e) evaluated with 3 results within limits (up to 50 closest results for each mass)

Elements Used:

C: 0-31 H: 0-24 N: 0-2 O: 0-4 Na: 0-1 Cl: 0-1

SCL N 11 (0.204)

1: TOF MS ES+

6.14e+000

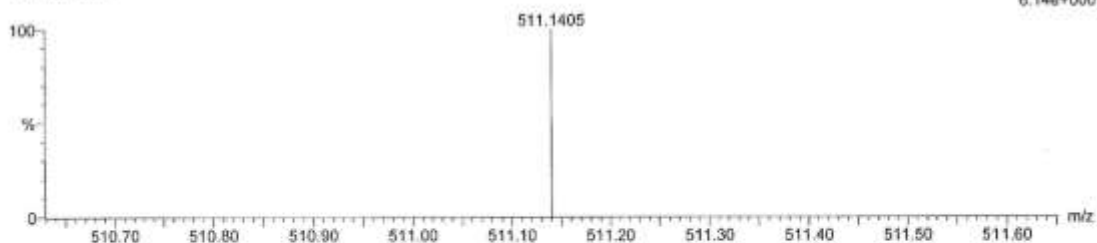

| Mass     | Calc. Mass | mDa   | PPM   | DBE  | i-FIT | Formula             |
|----------|------------|-------|-------|------|-------|---------------------|
| 511.1405 | 511.1425   | -2.0  | -3.9  | 19.5 | n/a   | C30 H24 N2 O4 Cl    |
|          | 511.1189   | 21.6  | 42.3  | 21.5 | n/a   | C31 H21 N2 O2 Na Cl |
|          | 511.1634   | -22.9 | -44.8 | 20.5 | n/a   | C31 H24 N2 O4 Na    |

**Elemental Composition Report**

**Single Mass Analysis**

Tolerance = 50.0 PPM / DBE: min = -1.5, max = 50.0

Element prediction: Off

Number of isotope peaks used for i-FIT = 3

Monoisotopic Mass, Odd and Even Electron Ions

45 formula(e) evaluated with 2 results within limits (up to 50 closest results for each mass)

Elements Used:

C: 0-31 H: 0-24 N: 0-2 O: 0-4 Na: 0-1 Br: 0-1

SBR N 49 (0.909)

1: TOF MS ES+

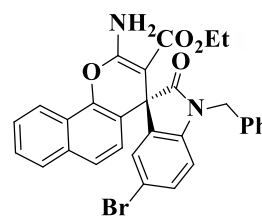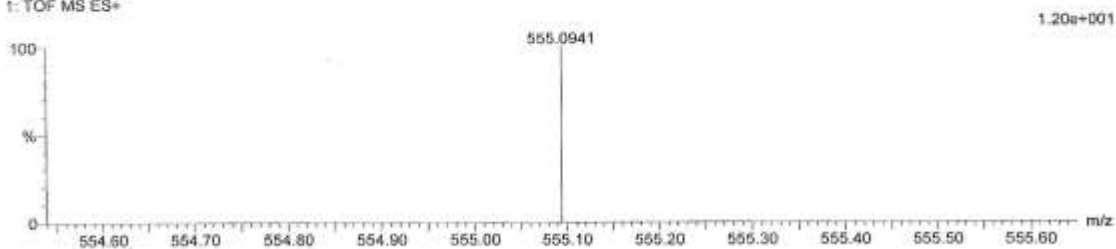

| Minimum: |            |      |      | -1.5 |       |                     |
|----------|------------|------|------|------|-------|---------------------|
| Maximum: |            | 5.0  | 50.0 | 50.0 |       |                     |
| Mass     | Calc. Mass | mDa  | PPM  | DBE  | i-FIT | Formula             |
| 555.0941 | 555.0919   | 2.2  | 4.0  | 19.5 | n/a   | C30 H24 N2 O4 Br    |
|          | 555.0684   | 25.7 | 46.3 | 21.5 | n/a   | C31 H21 N2 O2 Na Br |

Elemental Composition Report

Single Mass Analysis

Tolerance = 50.0 PPM / DBE: min = -1.5, max = 50.0

Element prediction: Off

Number of isotope peaks used for i-FIT = 3

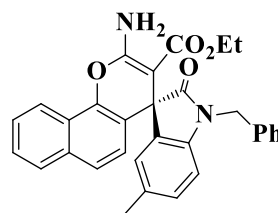

Monoisotopic Mass, Odd and Even Electron Ions

24155 formula(e) evaluated with 40 results within limits (up to 50 closest results for each mass)

Elements Used:

C: 0-32 H: 0-27 Li: 0-1 B: 0-1 N: 0-2 O: 0-4 Na: 0-1 Si: 0-1 K: 0-1 V: 0-2 Ru: 0-1 I: 0-1

Eu: 0-2

SME N

SME N 46 (0.686)

1: TOF MS ES+  
2.04e+001

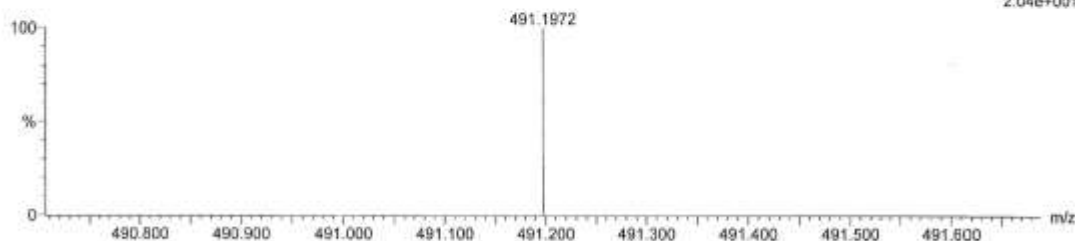

| Mass     | Calc. Mass | mDa   | PPM   | DBE  | i-FIT | Formula                  |
|----------|------------|-------|-------|------|-------|--------------------------|
| 491.1972 | 491.1971   | 0.1   | 0.2   | 19.5 | n/a   | C31 H27 N2 O4            |
|          | 491.1982   | -1.0  | -2.0  | 17.5 | n/a   | C30 H26 Li B O4 Na       |
|          | 491.1947   | 2.5   | 5.1   | 21.5 | n/a   | C32 H24 Li N2 O3         |
|          | 491.1938   | 3.4   | 6.9   | 20.5 | n/a   | C30 H25 Li B N2 O2 Si    |
|          | 491.2006   | -3.4  | -6.9  | 20.5 | n/a   | C32 H25 Li B O4          |
|          | 491.1923   | 4.9   | 10.0  | 18.5 | n/a   | C30 H25 Li N2 O3 Na      |
|          | 491.1914   | 5.8   | 11.8  | 17.5 | n/a   | C28 H26 Li B N2 O2 Na Si |
|          | 491.2033   | -6.1  | -12.4 | 20.0 | n/a   | C32 H27 B N O2 Na        |
|          | 491.1907   | 6.5   | 13.2  | 20.5 | n/a   | C31 H25 B N2 O2 Na       |
|          | 491.1901   | 7.1   | 14.5  | 18.5 | n/a   | C32 H27 Li B Na K        |
|          | 491.2049   | -7.7  | -15.7 | 18.0 | n/a   | C31 H27 Li N O3 Na       |
|          | 491.1893   | 7.9   | 16.1  | 21.0 | n/a   | C32 H26 Li N O2 Si       |
|          | 491.1884   | 8.8   | 17.9  | 17.5 | n/a   | C29 H26 Li B N2 O2 K     |
|          | 491.1883   | 8.9   | 18.1  | 22.5 | n/a   | C32 H22 Li B N2 O Na     |
|          | 491.1880   | 9.2   | 18.7  | 21.0 | n/a   | C31 H23 Li B N O4        |
|          | 491.2064   | -9.2  | -18.7 | 20.0 | n/a   | C31 H27 Li B N O2 Si     |
|          | 491.1869   | 10.3  | 21.0  | 18.0 | n/a   | C30 H27 Li N O2 Na Si    |
|          | 491.1860   | 11.2  | 22.8  | 14.5 | n/a   | C27 H27 Li B N2 O2 Na K  |
|          | 491.1856   | 11.6  | 23.6  | 18.0 | n/a   | C29 H24 Li B N O4 Na     |
|          | 491.1853   | 11.9  | 24.2  | 20.0 | n/a   | C31 H27 B N O Na Si      |
|          | 491.2094   | -12.2 | -24.8 | 17.5 | n/a   | C29 H26 Li B N2 O3 Na    |
|          | 491.1839   | 13.3  | 27.1  | 18.0 | n/a   | C31 H27 Li N O2 K        |
|          | 491.1829   | 14.3  | 29.1  | 22.0 | n/a   | C32 H24 Li B N Na Si     |
|          | 491.2118   | -14.6 | -29.7 | 20.5 | n/a   | C31 H25 Li B N2 O3       |
|          | 491.1826   | 14.6  | 29.7  | 20.5 | n/a   | C31 H25 Li B O3 Si       |
|          | 491.1823   | 14.9  | 30.3  | 20.0 | n/a   | C32 H27 B N O K          |
|          | 491.1811   | 16.1  | 32.8  | 18.5 | n/a   | C31 H25 Li O4 Na         |
|          | 491.1802   | 17.0  | 34.6  | 17.5 | n/a   | C29 H26 Li B O3 Na Si    |
|          | 491.1794   | 17.8  | 36.2  | 20.5 | n/a   | C32 H25 B O3 Na          |
|          | 491.1791   | 18.1  | 36.8  | 19.5 | n/a   | C30 H27 N2 O3 Si         |
|          | 491.1775   | 19.7  | 40.1  | 19.0 | n/a   | C31 H25 Li B N Na K      |
|          | 491.1772   | 20.0  | 40.7  | 17.5 | n/a   | C30 H26 Li B O3 K        |
|          | 491.1767   | 20.5  | 41.7  | 21.5 | n/a   | C31 H24 Li N2 O2 Si      |
|          | 491.1754   | 21.8  | 44.4  | 21.5 | n/a   | C30 H21 Li B N2 O4       |
|          | 491.1751   | 22.1  | 45.0  | 23.5 | n/a   | C32 H24 B N2 O Si        |
|          | 491.1748   | 22.4  | 45.6  | 14.5 | n/a   | C28 H27 Li B O3 Na K     |
|          | 491.1743   | 22.9  | 46.6  | 18.5 | n/a   | C29 H25 Li N2 O2 Na Si   |
|          | 491.1735   | 23.7  | 48.2  | 21.5 | n/a   | C32 H24 H2 O2 Na         |
|          | 491.1730   | 24.2  | 49.3  | 18.5 | n/a   | C29 H22 Li B N2 O4 Na    |
|          | 491.1727   | 24.5  | 49.9  | 20.5 | n/a   | C30 H25 B N2 O Na Si     |

Elemental Composition Report

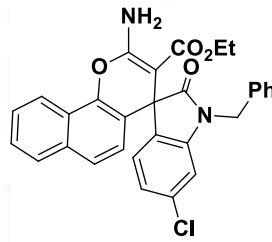

Single Mass Analysis

Tolerance = 50.0 PPM / DBE: min = -1.5, max = 50.0  
 Element prediction: Off  
 Number of isotope peaks used for i-FIT = 3

Monoisotopic Mass, Odd and Even Electron Ions  
 35 formula(e) evaluated with 3 results within limits (up to 50 closest results for each mass)  
 Elements Used:  
 C: 0-31 H: 0-24 N: 0-2 O: 0-4 Na: 0-1 Cl: 0-1  
 6CLN 32 (0.594)  
 1: TOF MS ES+

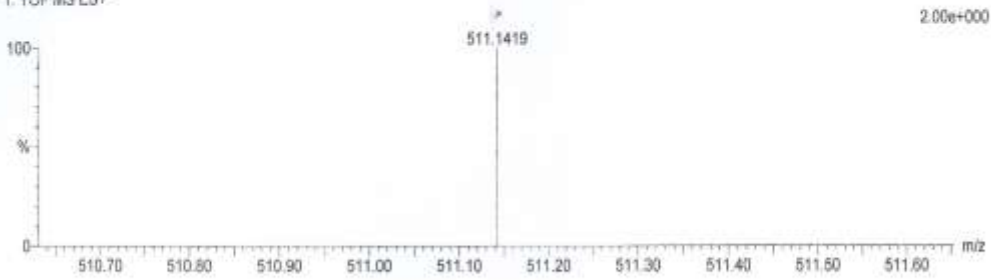

| Mass     | Calc. Mass | mDa   | PPM   | DBE  | i-FIT | Formula             |
|----------|------------|-------|-------|------|-------|---------------------|
| 511.1419 | 511.1425   | -0.6  | -1.2  | 19.5 | n/a   | C30 H24 N2 O4 Cl    |
|          | 511.1634   | -21.5 | -42.1 | 20.5 | n/a   | C31 H24 N2 O4 Na    |
|          | 511.1189   | 23.0  | 45.0  | 21.5 | n/a   | C31 H21 N2 O2 Na Cl |

Elemental Composition Report

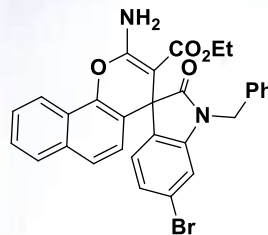

Page 1

Single Mass Analysis

Tolerance = 50.0 PPM / DBE: min = -1.5, max = 50.0

Element prediction: Off

Number of isotope peaks used for i-FIT = 3

Monoisotopic Mass, Odd and Even Electron Ions

45 formula(e) evaluated with 2 results within limits (up to 50 closest results for each mass)

Elements Used:

C: 0-31 H: 0-24 N: 0-2 O: 0-4 Na: 0-1 Br: 0-1

6BRN 44 (0.816)

1: TOF MS ES+

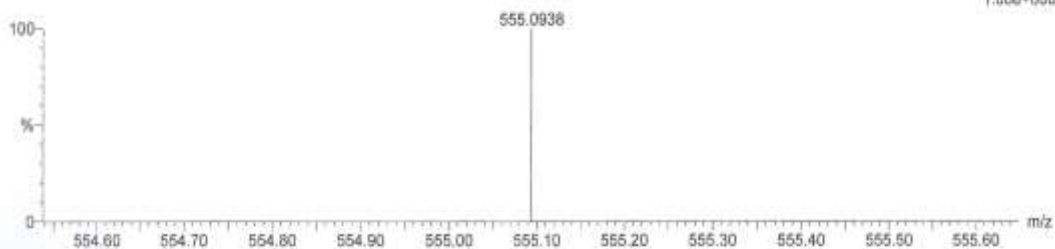

| Mass     | Calc. Mass | mDa  | PPM  | DBE  | i-FIT | Formula             |
|----------|------------|------|------|------|-------|---------------------|
| 555.0938 | 555.0919   | 1.9  | 3.4  | 19.5 | n/a   | C30 H24 N2 O4 Br    |
|          | 555.0684   | 25.4 | 45.8 | 21.5 | n/a   | C31 H21 N2 O2 Na Br |

Elemental Composition Report

Single Mass Analysis

Tolerance = 50.0 PPM / DBE: min = -1.5, max = 50.0

Element prediction: Off

Number of isotope peaks used for i-FIT = 3

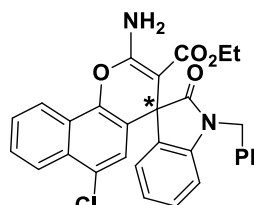

Monoisotopic Mass, Odd and Even Electron Ions

34 formula(e) evaluated with 3 results within limits (up to 50 closest results for each mass)

Elements Used:

C: 0-31 H: 0-24 N: 0-2 O: 0-4 F: 0-1 Cl: 0-1

4CLN 49 (0.909)

1: TOF MS ES+

3.48e+000

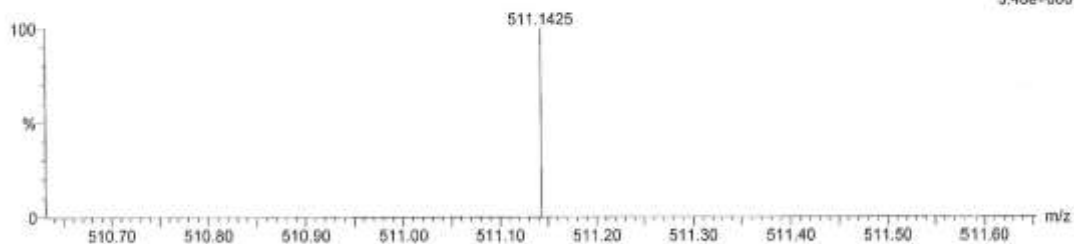

Minimum: -1.5  
Maximum: 50.0 50.0 50.0

| Mass     | Calc. Mass | mDa  | PPM  | DBE  | i-FIT | Formula            |
|----------|------------|------|------|------|-------|--------------------|
| 511.1425 | 511.1425   | 0.0  | 0.0  | 19.5 | n/a   | C30 H24 N2 O4 Cl   |
|          | 511.1350   | 7.5  | 14.7 | 20.0 | n/a   | C31 H23 N O3 F Cl  |
|          | 511.1225   | 20.0 | 39.1 | 20.5 | n/a   | C30 H21 N2 O3 F Cl |

Elemental Composition Report

Single Mass Analysis

Tolerance = 50.0 PPM / DBE: min = -1.5, max = 50.0  
 Element prediction: Off  
 Number of isotope peaks used for i-FIT = 3

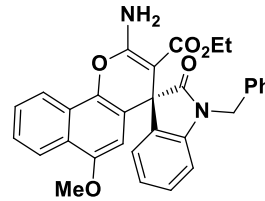

Monoisotopic Mass, Even Electron Ions

29707 formula(e) evaluated with 31 results within limits (up to 50 closest results for each mass)

Elements Used:

C: 0-32 H: 0-27 Li: 0-1 B: 0-1 N: 0-2 O: 0-5 Na: 0-1 Si: 0-1 K: 0-1 V: 0-2 Ru: 0-1 I: 0-1  
 Eu: 0-2

4MEON 54 (1.001)  
 1: TOF MS ES+

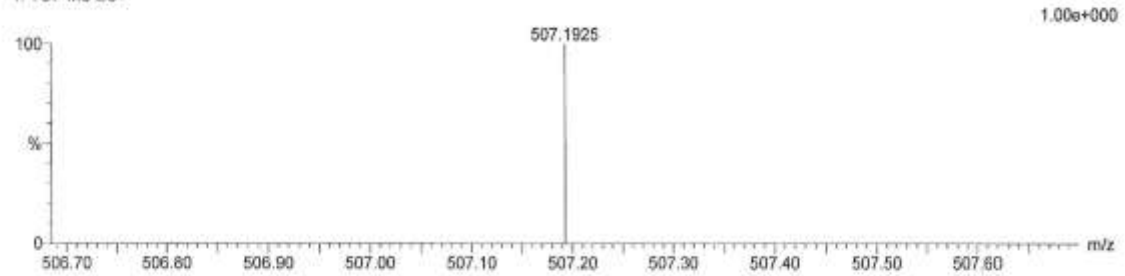

| Mass     | Calc. Mass | mDa   | PPM   | DBE  | i-FIT | Formula                  |
|----------|------------|-------|-------|------|-------|--------------------------|
| 507.1925 | 507.1920   | 0.5   | 1.0   | 19.5 | n/a   | C31 H27 N2 O5            |
|          | 507.1931   | -0.6  | -1.2  | 17.5 | n/a   | C30 H26 Li B O5 Na       |
|          | 507.1896   | 2.9   | 5.7   | 21.5 | n/a   | C32 H24 Li N2 O4         |
|          | 507.1955   | -3.0  | -5.9  | 20.5 | n/a   | C32 H25 Li B O5          |
|          | 507.1962   | -3.7  | -7.3  | 18.5 | n/a   | C31 H27 Li B N2 Na K     |
|          | 507.1888   | 3.7   | 7.3   | 20.5 | n/a   | C30 H25 Li B N2 O3 Si    |
|          | 507.1872   | 5.3   | 10.4  | 18.5 | n/a   | C30 H25 Li N2 O4 Na      |
|          | 507.1864   | 6.1   | 12.0  | 17.5 | n/a   | C28 H26 Li B N2 O3 Na Si |
|          | 507.1856   | 6.9   | 13.6  | 20.5 | n/a   | C31 H25 B N2 O3 Na       |
|          | 507.1830   | 7.5   | 14.8  | 18.5 | n/a   | C32 H27 Li B O Na K      |
|          | 507.1834   | 9.1   | 17.9  | 17.5 | n/a   | C29 H26 Li B N2 O3 K     |
|          | 507.2016   | -9.1  | -17.9 | 21.5 | n/a   | C32 H26 Li B N2 Na Si    |
|          | 507.1832   | 9.3   | 18.3  | 22.5 | n/a   | C32 H22 Li B N2 O2 Na    |
|          | 507.1810   | 11.5  | 22.7  | 14.5 | n/a   | C27 H27 Li B N2 O3 Na K  |
|          | 507.2043   | -11.8 | -23.3 | 17.5 | n/a   | C29 H26 Li B N2 O4 Na    |
|          | 507.1791   | 13.4  | 26.4  | 19.5 | n/a   | C32 H26 Li N2 Na K       |
|          | 507.2067   | -14.2 | -28.0 | 20.5 | n/a   | C31 H25 Li B N2 O4       |
|          | 507.1775   | 15.0  | 29.6  | 20.5 | n/a   | C31 H25 Li B O4 Si       |
|          | 507.1760   | 16.5  | 32.5  | 18.5 | n/a   | C31 H25 Li O5 Na         |
|          | 507.1751   | 17.4  | 34.3  | 17.5 | n/a   | C29 H26 Li B O4 Na Si    |
|          | 507.1744   | 18.1  | 35.7  | 20.5 | n/a   | C32 H25 B O4 Na          |
|          | 507.1740   | 18.5  | 36.5  | 19.5 | n/a   | C30 H27 N2 O4 Si         |
|          | 507.1721   | 20.4  | 40.2  | 17.5 | n/a   | C30 H26 Li B O4 K        |
|          | 507.1716   | 20.9  | 41.2  | 21.5 | n/a   | C31 H24 Li N2 O3 Si      |
|          | 507.1704   | 22.1  | 43.6  | 21.5 | n/a   | C30 H21 Li B N2 O5       |
|          | 507.1700   | 22.5  | 44.4  | 23.5 | n/a   | C32 H24 B N2 O2 Si       |
|          | 507.1697   | 22.8  | 45.0  | 14.5 | n/a   | C28 H27 Li B O4 Na K     |
|          | 507.1692   | 23.3  | 45.9  | 18.5 | n/a   | C29 H25 Li N2 O3 Na Si   |
|          | 507.1685   | 24.0  | 47.3  | 21.5 | n/a   | C32 H24 N2 O3 Na         |
|          | 507.1680   | 24.5  | 48.3  | 18.5 | n/a   | C28 H22 Li B N2 O5 Na    |
|          | 507.1676   | 24.9  | 49.1  | 20.5 | n/a   | C30 H25 B N2 O2 Na Si    |



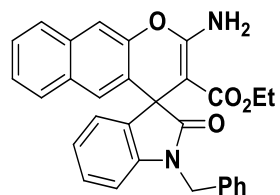

**Elemental Composition Report**

**Single Mass Analysis**

Tolerance = 50.0 PPM / DBE: min = -1.5, max = 50.0

Element prediction: Off

Number of isotope peaks used for I-FIT = 3

Monoisotopic Mass, Even Electron Ions

6 formula(e) evaluated with 1 results within limits (up to 50 closest results for each mass)

Elements Used:

C: 0-31 H: 0-25 N: 0-2 O: 0-4

2NEZ 43 (0.797)

1: TOF MS ES+

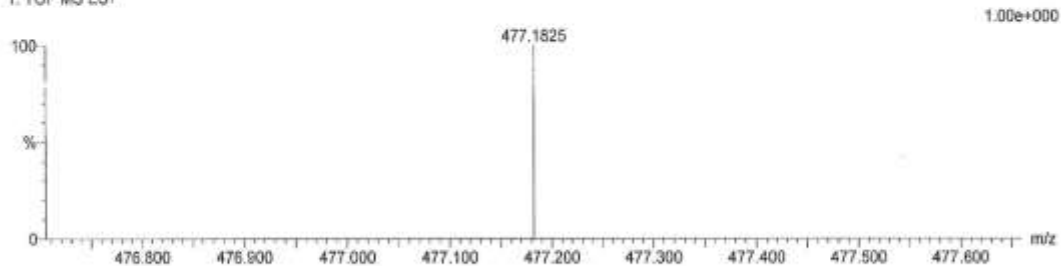

| Mass     | Calc. Mass | mDa | PPM | DBE  | i-FIT | Formula       |
|----------|------------|-----|-----|------|-------|---------------|
| 477.1825 | 477.1814   | 1.1 | 2.3 | 19.5 | n/a   | C30 H25 N2 O4 |

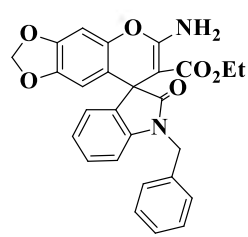

**Elemental Composition Report**

**Single Mass Analysis**

Tolerance = 50.0 PPM / DBE: min = -1.5, max = 50.0  
 Element prediction: Off  
 Number of isotope peaks used for i-FIT = 3

Monoisotopic Mass, Odd and Even Electron Ions  
 29 formula(e) evaluated with 2 results within limits (up to 50 closest results for each mass)  
 Elements Used:  
 C: 0-28 H: 0-23 N: 0-2 O: 0-6 Na: 0-1  
 S BZ 23 (0.427)  
 1: TOF MS ES+

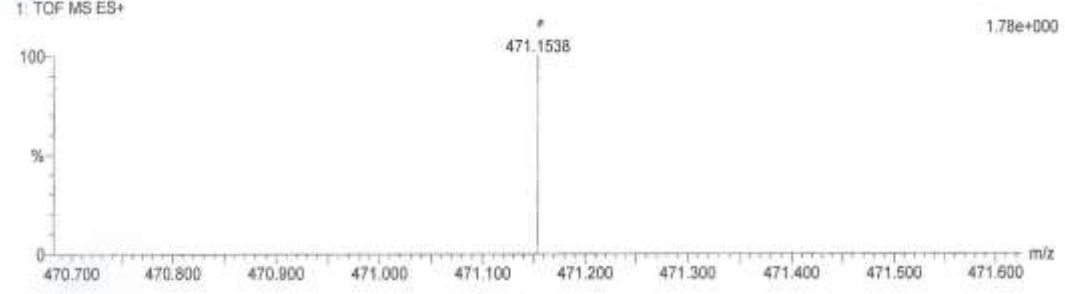

| Mass     | Calc. Mass | mDa  | PPM  | DBE  | i-FIT | Formula          |
|----------|------------|------|------|------|-------|------------------|
| 471.1538 | 471.1556   | -1.8 | -3.8 | 17.5 | n/a   | C27 H23 N2 O6    |
|          | 471.1321   | 21.7 | 46.1 | 19.5 | n/a   | C28 H20 N2 O4 Na |

Elemental Composition Report

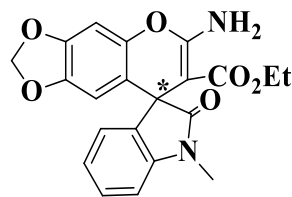

Single Mass Analysis

Tolerance = 50.0 PPM / DBE: min = -1.5, max = 50.0  
 Element prediction: Off  
 Number of isotope peaks used for i-FIT = 3

Monoisotopic Mass, Even Electron Ions

30 formula(e) evaluated with 1 results within limits (up to 50 closest results for each mass)

Elements Used:

C: 0-22 H: 0-19 N: 0-2 O: 0-6 Na: 0-1

S ME 44 (0.816)

I: TOF MS ES+

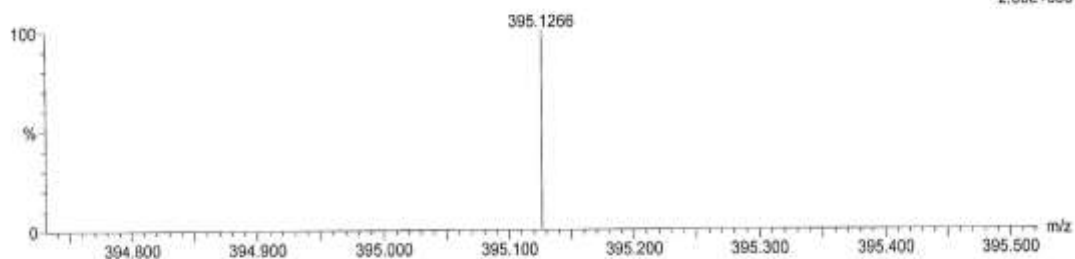

| Mass     | Calc. Mass | mDa | PPM | DBE  | i-FIT | Formula       |
|----------|------------|-----|-----|------|-------|---------------|
| 395.1266 | 395.1243   | 2.3 | 5.8 | 13.5 | n/a   | C21 H19 N2 O6 |

### Elemental Composition Report

Page 1

#### Single Mass Analysis

Tolerance = 50.0 PPM / DBE: min = -1.5, max = 50.0

Element prediction: Off

Number of isotope peaks used for i-FIT = 3

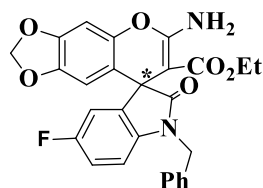

Monoisotopic Mass, Odd and Even Electron Ions

81 formula(e) evaluated with 1 results within limits (up to 50 closest results for each mass)

Elements Used:

C: 0-28 H: 0-22 N: 0-2 O: 0-6 F: 0-1 Br: 0-1

5F S 45 (0.835)

1: TOF MS ES+

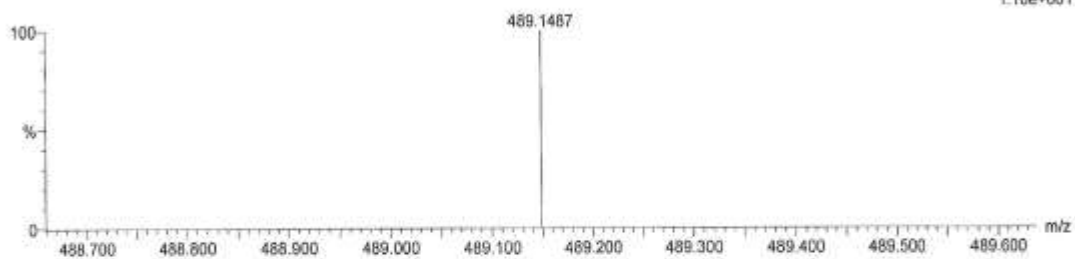

Minimum: -1.5  
Maximum: 50.0 50.0 50.0

| Mass     | Calc. Mass | mDa | PPM | DBE  | i-FIT | Formula         |
|----------|------------|-----|-----|------|-------|-----------------|
| 489.1467 | 489.1462   | 2.5 | 5.1 | 17.5 | n/a   | C27 H22 N2 O6 F |

Elemental Composition Report

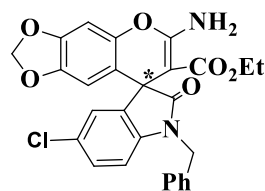

Single Mass Analysis

Tolerance = 50.0 PPM / DBE: min = -1.5, max = 50.0

Element prediction: Off

Number of isotope peaks used for i-FIT = 3

Monoisotopic Mass, Odd and Even Electron Ions

61 formula(e) evaluated with 3 results within limits (up to 50 closest results for each mass)

Elements Used:

C: 0-28 H: 0-22 N: 0-2 O: 0-6 Na: 0-1 Cl: 0-1

5CLS

5CLS 31 (0.452)

t: TOF MS ES+  
1.00e+000

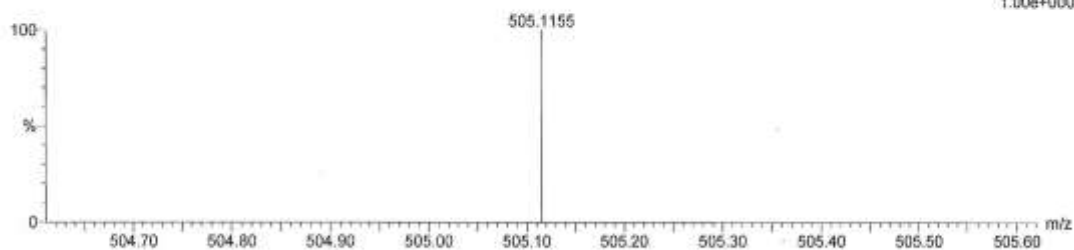

| Mass     | Calc. Mass | mDa   | PPM   | DBE  | i-FIT | Formula             |
|----------|------------|-------|-------|------|-------|---------------------|
| 505.1155 | 505.1166   | -1.1  | -2.2  | 17.5 | n/a   | C27 H22 N2 O6 Cl    |
|          | 505.1376   | -22.1 | -43.8 | 18.5 | n/a   | C28 H22 N2 O6 Na    |
|          | 505.0931   | 22.4  | 44.3  | 19.5 | n/a   | C28 H19 N2 O4 Na Cl |

Elemental Composition Report

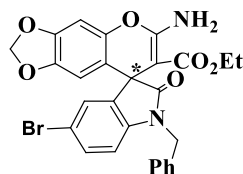

Single Mass Analysis

Tolerance = 50.0 PPM / DBE: min = -1.5, max = 50.0

Element prediction: Off

Number of isotope peaks used for i-FIT = 3

Monoisotopic Mass, Odd and Even Electron Ions

70 formula(e) evaluated with 2 results within limits (up to 50 closest results for each mass)

Elements Used:

C: 0-28 H: 0-22 N: 0-2 O: 0-6 Na: 0-1 Br: 0-1

58R S 13 (0.241)

1: TOF MS ES+

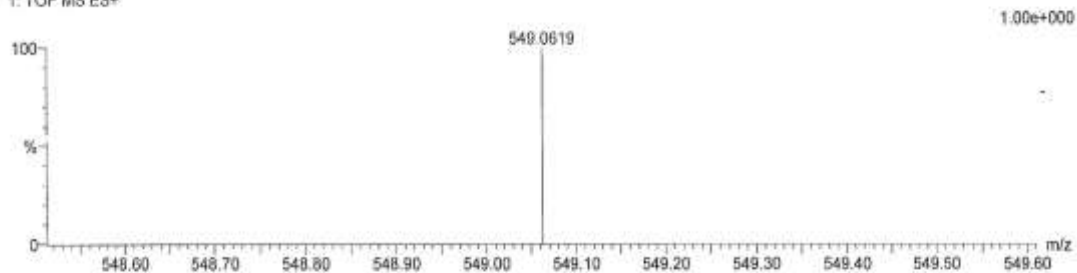

| Mass     | Calc. Mass | mDa  | PPM  | DBE  | i-FIT | Formula             |
|----------|------------|------|------|------|-------|---------------------|
| 549.0619 | 549.0661   | -4.2 | -7.6 | 17.5 | n/a   | C27 H22 N2 O6 Br    |
|          | 549.0426   | 19.3 | 35.2 | 19.5 | n/a   | C28 H19 N2 O4 Na Br |

**Elemental Composition Report**

**Single Mass Analysis**

Tolerance = 50.0 PPM / DBE: min = -1.5, max = 50.0  
 Element prediction: Off  
 Number of isotope peaks used for i-FIT = 3

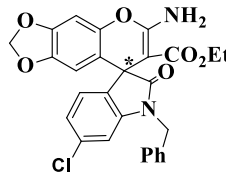

**Monoisotopic Mass, Odd and Even Electron Ions**

61 formula(e) evaluated with 3 results within limits (up to 50 closest results for each mass)

Elements Used:

C: 0-28 H: 0-22 N: 0-2 O: 0-6 Na: 0-1 Cl: 0-1

6CL S 45 (0.834)

1: TOF MS ES+

3.42e+000

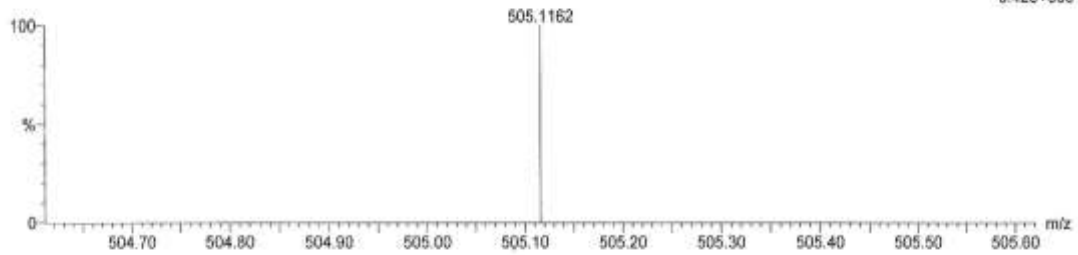

| Mass     | Calc. Mass | mDa   | PPM   | DBE  | i-FIT | Formula             |
|----------|------------|-------|-------|------|-------|---------------------|
| 505.1162 | 505.1166   | -0.4  | -0.8  | 17.5 | n/a   | C27 H22 N2 O6 Cl    |
|          | 505.1376   | -21.4 | -42.4 | 18.5 | n/a   | C28 H22 N2 O6 Na    |
|          | 505.0931   | 23.1  | 45.7  | 19.5 | n/a   | C28 H19 N2 O4 Na Cl |

### Elemental Composition Report

#### Single Mass Analysis

Tolerance = 50.0 PPM / DBE: min = -1.5, max = 50.0

Element prediction: Off

Number of isotope peaks used for i-FIT = 3

Monoisotopic Mass, Odd and Even Electron Ions

70 formula(e) evaluated with 1 results within limits (up to 50 closest results for each mass)

Elements Used:

C: 0-26 H: 0-22 N: 0-2 O: 0-6 Na: 0-1 Br: 0-1

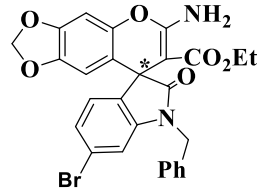

Page 1

6BR S 26 (0.482)

1: TOF MS ES+

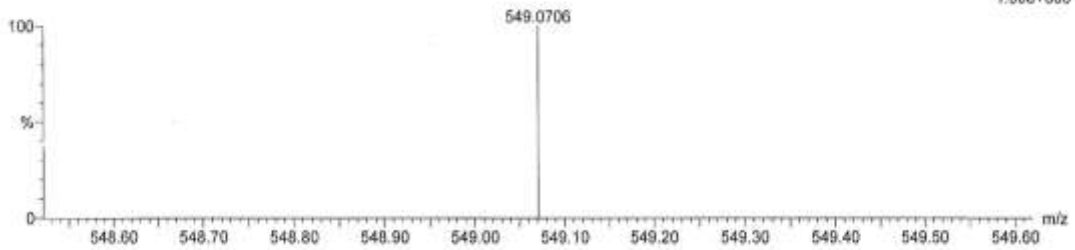

| Mass     | Calc. Mass | mDa | PPM | DBE  | i-FIT | Formula          |
|----------|------------|-----|-----|------|-------|------------------|
| 549.0706 | 549.0661   | 4.5 | 8.2 | 17.5 | n/a   | C27 H22 N2 O6 Br |



## Elemental Composition Report

### Single Mass Analysis

Tolerance = 50.0 PPM / DBE: min = -1.5, max = 50.0

Element prediction: Off

Number of isotope peaks used for i-FIT = 3

Monoisotopic Mass, Odd and Even Electron Ions

29 formula(e) evaluated with 1 results within limits (up to 50 closest results for each mass)

Elements Used:

C: 0-29 H: 0-25 N: 0-2 O: 0-6 Na: 0-1

5ME5

5ME5 61 (1.177)

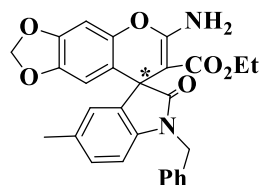

Page 1

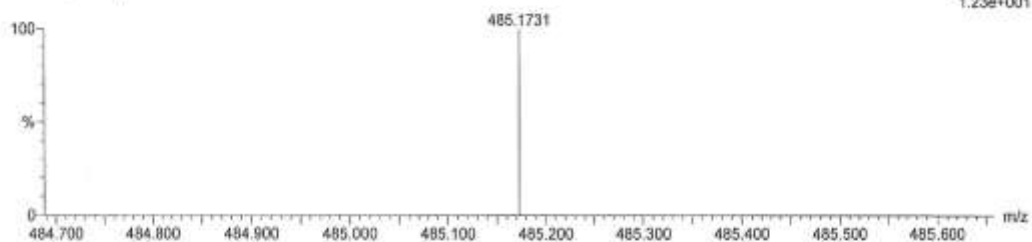

Minimum: -1.5

Maximum: 5.0 50.0 50.0

| Mass     | Calc. Mass | mDa | PPM | DBE  | i-FIT | Formula       |
|----------|------------|-----|-----|------|-------|---------------|
| 485.1731 | 485.1713   | 1.8 | 3.7 | 17.5 | n/a   | C28 H25 N2 O6 |
